# Supplementary material
Source: PubMed Central journal article supplement (PMC10491466)
Supplement: NIHMS1751066-supplement-S1.pdf [file NIHMS1751066-supplement-S1.pdf]

znt1\_[Ciona\_intestinalis]  
znt1a\_[Danio\_rerio]  
znt1\_human  
znt1\_[Mus\_musculus]  
znt1\_[Rattus\_norvegicus]  
znt1\_isoformG\_[Drosophila\_melanogaster]  
znt1\_isoformF\_[Drosophila\_melanogaster]  
znt1-like2\_[Hydra\_vulgaris]

-----  
-----  
-----  
-----  
-----  
-----  
-----  
-----

|                                                |       |       |       |       |
|------------------------------------------------|-------|-------|-------|-------|
| znt4_human                                     | ----- | ----- | ----- | ----- |
| znt4_[Rattus_norvegicus]                       | ----- | ----- | ----- | ----- |
| znt4_isoforma_[Mus_musculus]                   | ----- | ----- | ----- | ----- |
| znt4_isoformb_[Mus_musculus]                   | ----- | ----- | ----- | ----- |
| znt8_human                                     | ----- | ----- | ----- | ----- |
| znt8_[Mus_musculus]                            | ----- | ----- | ----- | ----- |
| znt8_[Rattus_norvegicus]                       | ----- | ----- | ----- | ----- |
| znt3_human                                     | ----- | ----- | ----- | ----- |
| znt3_[Rattus_norvegicus]                       | ----- | ----- | ----- | ----- |
| znt3_isoform1_[Mus_musculus]                   | ----- | ----- | ----- | ----- |
| znt3_isoform2_[Mus_musculus]                   | ----- | ----- | ----- | ----- |
| znt2-like_[Hydra_vulgaris]                     | ----- | ----- | ----- | ----- |
| znt35C_[Drosophila_melanogaster]               | ----- | ----- | ----- | ----- |
| znt2_[Ciona_intestinalis]                      | ----- | ----- | ----- | ----- |
| znt8_[Danio_rerio]                             | ----- | ----- | ----- | ----- |
| znt2_[Danio_rerio]                             | ----- | ----- | ----- | ----- |
| znt3_isoformX1_[Danio_rerio]                   | ----- | ----- | ----- | ----- |
| znt2_human                                     | ----- | ----- | ----- | ----- |
| znt2_isoform1_[Mus_musculus]                   | ----- | ----- | ----- | ----- |
| znt2_isoform2_[Mus_musculus]                   | ----- | ----- | ----- | ----- |
| znt2_isoform1_[Rattus_norvegicus]              | ----- | ----- | ----- | ----- |
| znt2_isoform2_[Rattus_norvegicus]              | ----- | ----- | ----- | ----- |
| znt9-like_[Hydra_vulgaris]                     | ----- | ----- | ----- | ----- |
| znt9_[Drosophila_melanogaster]                 | ----- | ----- | ----- | ----- |
| znt9-like_[Ciona_intestinalis]                 | ----- | ----- | ----- | ----- |
| znt9_[Danio_rerio]                             | ----- | ----- | ----- | ----- |
| znt9_human                                     | ----- | ----- | ----- | ----- |
| znt9_[Rattus_norvegicus]                       | ----- | ----- | ----- | ----- |
| isoform1_znt9_[Mus_musculus]                   | ----- | ----- | ----- | ----- |
| isoform2_znt9_[Mus_musculus]                   | ----- | ----- | ----- | ----- |
| znt9like_[E.Coli_partial]                      | ----- | ----- | ----- | ----- |
| znt9like_[Rhodanobacter_glycinis]              | ----- | ----- | ----- | ----- |
| znt9like_[Dyella_ginsengisoli]                 | ----- | ----- | ----- | ----- |
| znt9like2_[Actinobacteria_bacterium]           | ----- | ----- | ----- | ----- |
| znt9like_[Firmicutes_bacterium]                | ----- | ----- | ----- | ----- |
| znt9-like3_[Candidatus_Micrarchaeota_archaeon] | ----- | ----- | ----- | ----- |
| znt9like_[Mesorhizobium_sp._L2C054A000]        | ----- | ----- | ----- | ----- |
| znt9like_[Geopsychrobacter_electrodiphilus]    | ----- | ----- | ----- | ----- |
| znt9like_[Sneathiella_limimaris]               | ----- | ----- | ----- | ----- |
| znt9like_[Sneathiella_sp]                      | ----- | ----- | ----- | ----- |
| znt9like_[Sneathiella_chungangensis]           | ----- | ----- | ----- | ----- |
| znt9like_[Leptolyngbya_foveolarum]             | ----- | ----- | ----- | ----- |
| znt9like_[Massilia_sp._LC238]                  | ----- | ----- | ----- | ----- |
| znt9like1_[Variovorax_paradoxus]               | ----- | ----- | ----- | ----- |
| znt9like2_[Variovorax_paradoxus]               | ----- | ----- | ----- | ----- |
| znt9like_[Nitrosospira_sp._Nsp11]              | ----- | ----- | ----- | ----- |
| znt9like_[Sorangium_cellulosum]                | ----- | ----- | ----- | ----- |
| znt9like1_[Actinobacteria_bacterium]           | ----- | ----- | ----- | ----- |
| znt9like_[Phormidesmis_priestleyi]             | ----- | ----- | ----- | ----- |
| znt9like1_[Nosdoc_punctiforme]                 | ----- | ----- | ----- | ----- |
| znt9like2_[Nosdoc_punctiforme]                 | ----- | ----- | ----- | ----- |
| znt9like_[Nostoc_calcicola]                    | ----- | ----- | ----- | ----- |
| znt9like_[Nostoc_commune]                      | ----- | ----- | ----- | ----- |
| znt9like_[Nostoc_piscinale]                    | ----- | ----- | ----- | ----- |

|                                                                         |            |           |            |            |            |
|-------------------------------------------------------------------------|------------|-----------|------------|------------|------------|
| znt9like_[Nostoc_cycadae]                                               | -----      | -----     | -----      | -----      | -----      |
| znt9like_[Myxosarcina_sp._GI1]                                          | -----      | -----     | -----      | -----      | -----      |
| znt9like_[Chondrocystis_sp._NIES-4102]                                  | -----      | -----     | -----      | -----      | -----      |
| znt9like_[Pleurocapsa_sp._PCC_7319]                                     | -----      | -----     | -----      | -----      | -----      |
| znt33D_[Drosophila_melanogaster]                                        | -----      | -----     | -----      | -----      | -----      |
| transporter_[Pleurocapsa_sp._PCC_7319]                                  | -----      | -----     | -----      | -----      | -----      |
| transporter_[Leptolyngbya_foveolarum]                                   | -----      | -----     | -----      | -----      | -----      |
| transporter_[Myxosarcina_sp._GI1]                                       | -----      | -----     | -----      | -----      | -----      |
| transporter_[Chondrocystis_sp._NIES-4102]                               | -----      | -----     | -----      | -----      | -----      |
| transporter_[Phormidesmis_priestleyi]                                   | -----      | -----     | -----      | -----      | -----      |
| transporter_[Nostoc_piscinale]                                          | -----      | -----     | -----      | -----      | -----      |
| transporter_[Nosdoc_punctiforme]                                        | -----      | -----     | -----      | -----      | -----      |
| transporter_[Nostoc_caldicola]                                          | -----      | -----     | -----      | -----      | -----      |
| cationtransporter3_[Firmicutes_bacterium]                               | -----      | -----     | -----      | -----      | -----      |
| c.e.p_[Firmicutes_bacterium]                                            | -----      | -----     | -----      | -----      | -----      |
| cationtransporter1_[Firmicutes_bacterium]                               | -----      | -----     | -----      | -----      | -----      |
| cationtransporter2_[Firmicutes_bacterium]                               | -----      | -----     | -----      | -----      | -----      |
| cationtransporter1_[Actinobacteria_bacterium]                           | -----      | -----     | -----      | -----      | -----      |
| cationtransporter2_[Actinobacteria_bacterium]                           | -----      | -----     | -----      | -----      | -----      |
| c.e.p_[Candidatus_Woeseearchaeota_archaeon_CG08_land_8_20_14_0_20_43_7] | -----      | -----     | -----      | -----      | -----      |
| transporter_[E.Coli]                                                    | -----      | -----     | -----      | -----      | -----      |
| znt9-like2_[Candidatus_Micrarchaeota_archaeon]                          | -----      | -----     | -----      | -----      | -----      |
| znt9-like_[Candidatus_Pacearchaeota_archaeon]                           | -----      | -----     | -----      | -----      | -----      |
| znt9-like_[Candidatus_Aenigmarchaeota_archaeon_ex4484_52]               | -----      | -----     | -----      | -----      | -----      |
| znt9-likel1_[Candidatus_Micrarchaeota_archaeon]                         | -----      | -----     | -----      | -----      | -----      |
| znt9-like4_[Candidatus_Micrarchaeota_archaeon]                          | -----      | -----     | -----      | -----      | -----      |
| znt9-like_[Candidatus_Woeseearchaeota_archaeon]                         | -----      | -----     | -----      | -----      | -----      |
| znt7_[Drosophila_melanogaster]                                          | -----      | -----     | -----      | -----      | -----      |
| znt7_[Danio_rerio]                                                      | -----      | -----     | -----      | -----      | -----      |
| znt7_human                                                              | -----      | -----     | -----      | -----      | -----      |
| znt7_[Mus_musculus]                                                     | -----      | -----     | -----      | -----      | -----      |
| znt7_[Rattus_norvegicus]                                                | -----      | -----     | -----      | -----      | -----      |
| znt5-like_[Ciona_intestinalis]                                          | GKYGIILVAV | KI--LRCVG | LFECYDILKS | IHLVQFLFLV | KLICSGVYLL |
| znt5_[Danio_rerio]                                                      | TRYIVLLYFT | KM--LKAFG | IFESYDILKV | VHIVQFLFIL | KMGCAVILVF |
| znt5_human                                                              | TKYIVLLCFT | KF--LKAVG | LFESYDLLKA | VHIVQFIFIL | KLGTAFFMVL |
| znt5_[Mus_musculus]                                                     | TRYILLCLT  | KC--LKAVG | LFESYDLLKA | VHIVQFIFIL | KLGTAFFMVL |
| znt5_[Rattus_norvegicus]                                                | TKYIVLLCLT | KC--LKAVG | LFESYDLLKA | VHIVQFIFIL | KLGTAFFMVL |
| znt6_[Ciona_intestinalis]                                               | -----      | -----     | -----      | -----      | -----      |
| znt6_[Danio_rerio]                                                      | -----      | -----     | -----      | -----      | -----      |
| znt6_human                                                              | -----      | -----     | -----      | -----      | -----      |
| znt6_[Rattus_norvegicus]                                                | -----      | -----     | -----      | -----      | -----      |
| znt6_isoform1_[Mus_musculus]                                            | -----      | -----     | -----      | -----      | -----      |
| znt6_isoform2_[Mus_musculus]                                            | -----      | -----     | -----      | -----      | -----      |
| znt4_[Danio_rerio]                                                      | -----      | -----     | -----      | -----      | -----      |
| cationtransporter1_[Candidatus_Micrarchaeota_archaeon]                  | -----      | -----     | -----      | -----      | -----      |
| transporter_[Geopsychrobacter_electrodiphilus]                          | -----      | -----     | -----      | -----      | -----      |
| cationtransporter2_[Candidatus_Micrarchaeota_archaeon]                  | -----      | -----     | -----      | -----      | -----      |
| znt10_[Danio_rerio]                                                     | -----      | -----     | -----      | -----      | -----      |
| znt10_human                                                             | -----      | -----     | -----      | -----      | -----      |
| znt10_[Mus_musculus]                                                    | -----      | -----     | -----      | -----      | -----      |
| znt10_[Rattus_norvegicus]                                               | -----      | -----     | -----      | -----      | -----      |
| znt1-likel1_[Hydra_vulgaris]                                            | -----      | -----     | -----      | -----      | -----      |
| znt1_[Ciona_intestinalis]                                               | -----      | -----     | -----      | -----      | -----      |
| znt1a_[Danio_rerio]                                                     | -----      | -----     | -----      | -----      | -----      |
| znt1_human                                                              | -----      | -----     | -----      | -----      | -----      |

znt1\_[Mus\_musculus]  
znt1\_[Rattus\_norvegicus]  
znt1\_isoformG\_[Drosophila\_melanogaster]  
znt1\_isoformF\_[Drosophila\_melanogaster]  
znt1-like2\_[Hydra\_vulgaris]

-----  
-----  
-----  
-----  
-----

|                                                |       |       |       |       |       |
|------------------------------------------------|-------|-------|-------|-------|-------|
| znt4_human                                     | ----- | ----- | ----- | ----- | ----- |
| znt4_[Rattus_norvegicus]                       | ----- | ----- | ----- | ----- | ----- |
| znt4_isoforma_[Mus_musculus]                   | ----- | ----- | ----- | ----- | ----- |
| znt4_isoformb_[Mus_musculus]                   | ----- | ----- | ----- | ----- | ----- |
| znt8_human                                     | ----- | ----- | ----- | ----- | ----- |
| znt8_[Mus_musculus]                            | ----- | ----- | ----- | ----- | ----- |
| znt8_[Rattus_norvegicus]                       | ----- | ----- | ----- | ----- | ----- |
| znt3_human                                     | ----- | ----- | ----- | ----- | ----- |
| znt3_[Rattus_norvegicus]                       | ----- | ----- | ----- | ----- | ----- |
| znt3_isoform1_[Mus_musculus]                   | ----- | ----- | ----- | ----- | ----- |
| znt3_isoform2_[Mus_musculus]                   | ----- | ----- | ----- | ----- | ----- |
| znt2-like_[Hydra_vulgaris]                     | ----- | ----- | ----- | ----- | ----- |
| znt35C_[Drosophila_melanogaster]               | ----- | ----- | ----- | ----- | ----- |
| znt2_[Ciona_intestinalis]                      | ----- | ----- | ----- | ----- | ----- |
| znt8_[Danio_rerio]                             | ----- | ----- | ----- | ----- | ----- |
| znt2_[Danio_rerio]                             | ----- | ----- | ----- | ----- | ----- |
| znt3_isoformX1_[Danio_rerio]                   | ----- | ----- | ----- | ----- | ----- |
| znt2_human                                     | ----- | ----- | ----- | ----- | ----- |
| znt2_isoform1_[Mus_musculus]                   | ----- | ----- | ----- | ----- | ----- |
| znt2_isoform2_[Mus_musculus]                   | ----- | ----- | ----- | ----- | ----- |
| znt2_isoform1_[Rattus_norvegicus]              | ----- | ----- | ----- | ----- | ----- |
| znt2_isoform2_[Rattus_norvegicus]              | ----- | ----- | ----- | ----- | ----- |
| znt9-like_[Hydra_vulgaris]                     | ----- | ----- | ----- | ----- | ----- |
| znt9_[Drosophila_melanogaster]                 | ----- | ----- | ----- | ----- | ----- |
| znt9-like_[Ciona_intestinalis]                 | ----- | ----- | ----- | ----- | ----- |
| znt9_[Danio_rerio]                             | ----- | ----- | ----- | ----- | ----- |
| znt9_human                                     | ----- | ----- | ----- | ----- | ----- |
| znt9_[Rattus_norvegicus]                       | ----- | ----- | ----- | ----- | ----- |
| isoform1_znt9_[Mus_musculus]                   | ----- | ----- | ----- | ----- | ----- |
| isoform2_znt9_[Mus_musculus]                   | ----- | ----- | ----- | ----- | ----- |
| znt9like_[E.Coli_partial]                      | ----- | ----- | ----- | ----- | ----- |
| znt9like_[Rhodanobacter_glycinis]              | ----- | ----- | ----- | ----- | ----- |
| znt9like_[Dyella_ginsengisoli]                 | ----- | ----- | ----- | ----- | ----- |
| znt9like2_[Actinobacteria_bacterium]           | ----- | ----- | ----- | ----- | ----- |
| znt9like_[Firmicutes_bacterium]                | ----- | ----- | ----- | ----- | ----- |
| znt9-like3_[Candidatus_Micrarchaeota_archaeon] | ----- | ----- | ----- | ----- | ----- |
| znt9like_[Mesorhizobium_sp._L2C054A000]        | ----- | ----- | ----- | ----- | ----- |
| znt9like_[Geopsychrobacter_electrodiphilus]    | ----- | ----- | ----- | ----- | ----- |
| znt9like_[Sneathiella_limimaris]               | ----- | ----- | ----- | ----- | ----- |
| znt9like_[Sneathiella_sp]                      | ----- | ----- | ----- | ----- | ----- |
| znt9like_[Sneathiella_chungangensis]           | ----- | ----- | ----- | ----- | ----- |
| znt9like_[Leptolyngbya_foveolarum]             | ----- | ----- | ----- | ----- | ----- |
| znt9like_[Massilia_sp._LC238]                  | ----- | ----- | ----- | ----- | ----- |
| znt9like1_[Variovorax_paradoxus]               | ----- | ----- | ----- | ----- | ----- |
| znt9like2_[Variovorax_paradoxus]               | ----- | ----- | ----- | ----- | ----- |
| znt9like_[Nitrosospira_sp._Nsp11]              | ----- | ----- | ----- | ----- | ----- |
| znt9like_[Sorangium_cellulosum]                | ----- | ----- | ----- | ----- | ----- |
| znt9like1_[Actinobacteria_bacterium]           | ----- | ----- | ----- | ----- | ----- |
| znt9like_[Phormidesmis_priestleyi]             | ----- | ----- | ----- | ----- | ----- |
| znt9like1_[Nosdoc_punctiforme]                 | ----- | ----- | ----- | ----- | ----- |
| znt9like2_[Nosdoc_punctiforme]                 | ----- | ----- | ----- | ----- | ----- |
| znt9like_[Nostoc_calcicola]                    | ----- | ----- | ----- | ----- | ----- |
| znt9like_[Nostoc_commune]                      | ----- | ----- | ----- | ----- | ----- |
| znt9like_[Nostoc_piscinale]                    | ----- | ----- | ----- | ----- | ----- |

|                                                                         |            |            |            |         |            |
|-------------------------------------------------------------------------|------------|------------|------------|---------|------------|
| znt9like_[Nostoc_cycadae]                                               | -----      | -----      | -----      | -----   | -----      |
| znt9like_[Myxosarcina_sp._GI1]                                          | -----      | -----      | -----      | -----   | -----      |
| znt9like_[Chondrocystis_sp._NIES-4102]                                  | -----      | -----      | -----      | -----   | -----      |
| znt9like_[Pleurocapsa_sp._PCC_7319]                                     | -----      | -----      | -----      | -----   | -----      |
| znt33D_[Drosophila_melanogaster]                                        | -----      | -----      | -----      | -----   | -----      |
| transporter_[Pleurocapsa_sp._PCC_7319]                                  | -----      | -----      | -----      | -----   | -----      |
| transporter_[Leptolyngbya_foveolarum]                                   | -----      | -----      | -----      | -----   | -----      |
| transporter_[Myxosarcina_sp._GI1]                                       | -----      | -----      | -----      | -----   | -----      |
| transporter_[Chondrocystis_sp._NIES-4102]                               | -----      | -----      | -----      | -----   | -----      |
| transporter_[Phormidesmis_priestleyi]                                   | -----      | -----      | -----      | -----   | -----      |
| transporter_[Nostoc_piscinale]                                          | -----      | -----      | -----      | -----   | -----      |
| transporter_[Nostoc_punctiforme]                                        | -----      | -----      | -----      | -----   | -----      |
| transporter_[Nostoc_caldicola]                                          | -----      | -----      | -----      | -----   | -----      |
| cationtransporter3_[Firmicutes_bacterium]                               | -----      | -----      | -----      | -----   | -----      |
| c.e.p_[Firmicutes_bacterium]                                            | -----      | -----      | -----      | -----   | -----      |
| cationtransporter1_[Firmicutes_bacterium]                               | -----      | -----      | -----      | -----   | -----      |
| cationtransporter2_[Firmicutes_bacterium]                               | -----      | -----      | -----      | -----   | -----      |
| cationtransporter1_[Actinobacteria_bacterium]                           | -----      | -----      | -----      | -----   | -----      |
| cationtransporter2_[Actinobacteria_bacterium]                           | -----      | -----      | -----      | -----   | -----      |
| c.e.p_[Candidatus_Woeseearchaeota_archaeon_CG08_land_8_20_14_0_20_43_7] | -----      | -----      | -----      | -----   | -----      |
| transporter_[E.Coli]                                                    | -----      | -----      | -----      | -----   | -----      |
| znt9-like2_[Candidatus_Micrarchaeota_archaeon]                          | -----      | -----      | -----      | -----   | -----      |
| znt9-like_[Candidatus_Pacearchaeota_archaeon]                           | -----      | -----      | -----      | -----   | -----      |
| znt9-like_[Candidatus_Aenigmarchaeota_archaeon_ex4484_52]               | -----      | -----      | -----      | -----   | -----      |
| znt9-likel1_[Candidatus_Micrarchaeota_archaeon]                         | -----      | -----      | -----      | -----   | -----      |
| znt9-like4_[Candidatus_Micrarchaeota_archaeon]                          | -----      | -----      | -----      | -----   | -----      |
| znt9-like_[Candidatus_Woeseearchaeota_archaeon]                         | -----      | -----      | -----      | -----   | -----      |
| znt7_[Drosophila_melanogaster]                                          | -----      | -----      | -----      | -----   | -----      |
| znt7_[Danio_rerio]                                                      | -----      | -----      | -----      | -----   | -----      |
| znt7_human                                                              | -----      | -----      | -----      | -----   | -----      |
| znt7_[Mus_musculus]                                                     | -----      | -----      | -----      | -----   | -----      |
| znt7_[Rattus_norvegicus]                                                | -----      | -----      | -----      | -----   | -----      |
| znt5-like_[Ciona_intestinalis]                                          | IHKPFSSGRK | --LNKRQWSY | VFRHSVLGLL | NNVLWLF | ----SLTLCG |
| znt5_[Danio_rerio]                                                      | FQKPFSSGKM | --IPKRQWIK | ILKHAVISCI | ISLLGFF | ----GLTLCG |
| znt5_human                                                              | FQKPFSSGKT | --ITKHQWIK | IFKHAVAGCI | ISLLWFF | ----GLTLCG |
| znt5_[Mus_musculus]                                                     | FQKPFSSGKP | --ITKHQWIK | IFKHAVAGCI | ISLLWFF | ----GLTLCG |
| znt5_[Rattus_norvegicus]                                                | FQKPFSSGKT | --VTKHQWIK | IFKHAVAGCI | ISLLWFF | ----GLTLCG |
| znt6_[Ciona_intestinalis]                                               | -----      | -----      | -----      | -----   | -----      |
| znt6_[Danio_rerio]                                                      | -----      | -----      | -----      | -----   | -----      |
| znt6_human                                                              | -----      | -----      | -----      | -----   | -----      |
| znt6_[Rattus_norvegicus]                                                | -----      | -----      | -----      | -----   | -----      |
| znt6_isoform1_[Mus_musculus]                                            | -----      | -----      | -----      | -----   | -----      |
| znt6_isoform2_[Mus_musculus]                                            | -----      | -----      | -----      | -----   | -----      |
| znt4_[Danio_rerio]                                                      | -----      | -----      | -----      | -----   | -----      |
| cationtransporter1_[Candidatus_Micrarchaeota_archaeon]                  | -----      | -----      | -----      | -----   | -----      |
| transporter_[Geopsychrobacter_electrodiphilus]                          | -----      | -----      | -----      | -----   | -----      |
| cationtransporter2_[Candidatus_Micrarchaeota_archaeon]                  | -----      | -----      | -----      | -----   | -----      |
| znt10_[Danio_rerio]                                                     | -----      | -----      | -----      | -----   | -----      |
| znt10_human                                                             | -----      | -----      | -----      | -----   | -----      |
| znt10_[Mus_musculus]                                                    | -----      | -----      | -----      | -----   | -----      |
| znt10_[Rattus_norvegicus]                                               | -----      | -----      | -----      | -----   | -----      |
| znt1-likel1_[Hydra_vulgaris]                                            | -----      | -----      | -----      | -----   | -----      |
| znt1_[Ciona_intestinalis]                                               | -----      | -----      | -----      | -----   | -----      |
| znt1a_[Danio_rerio]                                                     | -----      | -----      | -----      | -----   | -----      |
| znt1_human                                                              | -----      | -----      | -----      | -----   | -----      |



znt1\_[Mus\_musculus]  
znt1\_[Rattus\_norvegicus]  
znt1\_isoformG\_[Drosophila\_melanogaster]  
znt1\_isoformF\_[Drosophila\_melanogaster]  
znt1-like2\_[Hydra\_vulgaris]

-----  
-----  
-----  
-----  
-----

|                                                |       |       |       |       |
|------------------------------------------------|-------|-------|-------|-------|
| znt4_human                                     | ----- | ----- | ----- | ----- |
| znt4_[Rattus_norvegicus]                       | ----- | ----- | ----- | ----- |
| znt4_isoforma_[Mus_musculus]                   | ----- | ----- | ----- | ----- |
| znt4_isoformb_[Mus_musculus]                   | ----- | ----- | ----- | ----- |
| znt8_human                                     | ----- | ----- | ----- | ----- |
| znt8_[Mus_musculus]                            | ----- | ----- | ----- | ----- |
| znt8_[Rattus_norvegicus]                       | ----- | ----- | ----- | ----- |
| znt3_human                                     | ----- | ----- | ----- | ----- |
| znt3_[Rattus_norvegicus]                       | ----- | ----- | ----- | ----- |
| znt3_isoform1_[Mus_musculus]                   | ----- | ----- | ----- | ----- |
| znt3_isoform2_[Mus_musculus]                   | ----- | ----- | ----- | ----- |
| znt2-like_[Hydra_vulgaris]                     | ----- | ----- | ----- | ----- |
| znt35C_[Drosophila_melanogaster]               | ----- | ----- | ----- | ----- |
| znt2_[Ciona_intestinalis]                      | ----- | ----- | ----- | ----- |
| znt8_[Danio_rerio]                             | ----- | ----- | ----- | ----- |
| znt2_[Danio_rerio]                             | ----- | ----- | ----- | ----- |
| znt3_isoformX1_[Danio_rerio]                   | ----- | ----- | ----- | ----- |
| znt2_human                                     | ----- | ----- | ----- | ----- |
| znt2_isoform1_[Mus_musculus]                   | ----- | ----- | ----- | ----- |
| znt2_isoform2_[Mus_musculus]                   | ----- | ----- | ----- | ----- |
| znt2_isoform1_[Rattus_norvegicus]              | ----- | ----- | ----- | ----- |
| znt2_isoform2_[Rattus_norvegicus]              | ----- | ----- | ----- | ----- |
| znt9-like_[Hydra_vulgaris]                     | ----- | ----- | ----- | ----- |
| znt9_[Drosophila_melanogaster]                 | ----- | ----- | ----- | ----- |
| znt9-like_[Ciona_intestinalis]                 | ----- | ----- | ----- | ----- |
| znt9_[Danio_rerio]                             | ----- | ----- | ----- | ----- |
| znt9_human                                     | ----- | ----- | ----- | ----- |
| znt9_[Rattus_norvegicus]                       | ----- | ----- | ----- | ----- |
| isoform1_znt9_[Mus_musculus]                   | ----- | ----- | ----- | ----- |
| isoform2_znt9_[Mus_musculus]                   | ----- | ----- | ----- | ----- |
| znt9like_[E.Coli_partial]                      | ----- | ----- | ----- | ----- |
| znt9like_[Rhodanobacter_glycinis]              | ----- | ----- | ----- | ----- |
| znt9like_[Dyella_ginsengisoli]                 | ----- | ----- | ----- | ----- |
| znt9like2_[Actinobacteria_bacterium]           | ----- | ----- | ----- | ----- |
| znt9like_[Firmicutes_bacterium]                | ----- | ----- | ----- | ----- |
| znt9-like3_[Candidatus_Micrarchaeota_archaeon] | ----- | ----- | ----- | ----- |
| znt9like_[Mesorhizobium_sp._L2C054A000]        | ----- | ----- | ----- | ----- |
| znt9like_[Geopsychrobacter_electrodiphilus]    | ----- | ----- | ----- | ----- |
| znt9like_[Sneathiella_limimaris]               | ----- | ----- | ----- | ----- |
| znt9like_[Sneathiella_sp]                      | ----- | ----- | ----- | ----- |
| znt9like_[Sneathiella_chungangensis]           | ----- | ----- | ----- | ----- |
| znt9like_[Leptolyngbya_foveolarum]             | ----- | ----- | ----- | ----- |
| znt9like_[Massilia_sp._LC238]                  | ----- | ----- | ----- | ----- |
| znt9like1_[Variovorax_paradoxus]               | ----- | ----- | ----- | ----- |
| znt9like2_[Variovorax_paradoxus]               | ----- | ----- | ----- | ----- |
| znt9like_[Nitrosospira_sp._Nsp11]              | ----- | ----- | ----- | ----- |
| znt9like_[Sorangium_cellulosum]                | ----- | ----- | ----- | ----- |
| znt9like1_[Actinobacteria_bacterium]           | ----- | ----- | ----- | ----- |
| znt9like_[Phormidesmis_priestleyi]             | ----- | ----- | ----- | ----- |
| znt9like1_[Nosdoc_punctiforme]                 | ----- | ----- | ----- | ----- |
| znt9like2_[Nosdoc_punctiforme]                 | ----- | ----- | ----- | ----- |
| znt9like_[Nostoc_calcicola]                    | ----- | ----- | ----- | ----- |
| znt9like_[Nostoc_commune]                      | ----- | ----- | ----- | ----- |
| znt9like_[Nostoc_piscinale]                    | ----- | ----- | ----- | ----- |

|                                                                         |       |       |       |       |
|-------------------------------------------------------------------------|-------|-------|-------|-------|
| znt9like_[Nostoc_cycadae]                                               | ----- | ----- | ----- | ----- |
| znt9like_[Myxosarcina_sp._GI1]                                          | ----- | ----- | ----- | ----- |
| znt9like_[Chondrocystis_sp._NIES-4102]                                  | ----- | ----- | ----- | ----- |
| znt9like_[Pleurocapsa_sp._PCC_7319]                                     | ----- | ----- | ----- | ----- |
| znt33D_[Drosophila_melanogaster]                                        | ----- | ----- | ----- | ----- |
| transporter_[Pleurocapsa_sp._PCC_7319]                                  | ----- | ----- | ----- | ----- |
| transporter_[Leptolyngbya_foveolarum]                                   | ----- | ----- | ----- | ----- |
| transporter_[Myxosarcina_sp._GI1]                                       | ----- | ----- | ----- | ----- |
| transporter_[Chondrocystis_sp._NIES-4102]                               | ----- | ----- | ----- | ----- |
| transporter_[Phormidesmis_priestleyi]                                   | ----- | ----- | ----- | ----- |
| transporter_[Nostoc_piscinale]                                          | ----- | ----- | ----- | ----- |
| transporter_[Nosdoc_punctiforme]                                        | ----- | ----- | ----- | ----- |
| transporter_[Nostoc_caldicola]                                          | ----- | ----- | ----- | ----- |
| cationtransporter3_[Firmicutes_bacterium]                               | ----- | ----- | ----- | ----- |
| c.e.p_[Firmicutes_bacterium]                                            | ----- | ----- | ----- | ----- |
| cationtransporter1_[Firmicutes_bacterium]                               | ----- | ----- | ----- | ----- |
| cationtransporter2_[Firmicutes_bacterium]                               | ----- | ----- | ----- | ----- |
| cationtransporter1_[Actinobacteria_bacterium]                           | ----- | ----- | ----- | ----- |
| cationtransporter2_[Actinobacteria_bacterium]                           | ----- | ----- | ----- | ----- |
| c.e.p_[Candidatus_Woeseearchaeota_archaeon_CG08_land_8_20_14_0_20_43_7] | ----- | ----- | ----- | ----- |
| transporter_[E.Coli]                                                    | ----- | ----- | ----- | ----- |
| znt9-like2_[Candidatus_Micrarchaeota_archaeon]                          | ----- | ----- | ----- | ----- |
| znt9-like_[Candidatus_Pacearchaeota_archaeon]                           | ----- | ----- | ----- | ----- |
| znt9-like_[Candidatus_Aenigmarchaeota_archaeon_ex4484_52]               | ----- | ----- | ----- | ----- |
| znt9-likel1_[Candidatus_Micrarchaeota_archaeon]                         | ----- | ----- | ----- | ----- |
| znt9-like4_[Candidatus_Micrarchaeota_archaeon]                          | ----- | ----- | ----- | ----- |
| znt9-like_[Candidatus_Woeseearchaeota_archaeon]                         | ----- | ----- | ----- | ----- |
| znt7_[Drosophila_melanogaster]                                          | ----- | ----- | ----- | ----- |
| znt7_[Danio_rerio]                                                      | ----- | ----- | ----- | ----- |
| znt7_human                                                              | ----- | ----- | ----- | ----- |
| znt7_[Mus_musculus]                                                     | ----- | ----- | ----- | ----- |
| znt7_[Rattus_norvegicus]                                                | ----- | ----- | ----- | ----- |
| znt5-like_[Ciona_intestinalis]                                          | ----- | ----- | ----- | ----- |
| znt5_[Danio_rerio]                                                      | ----- | ----- | ----- | ----- |
| znt5_human                                                              | ----- | ----- | ----- | ----- |
| znt5_[Mus_musculus]                                                     | ----- | ----- | ----- | ----- |
| znt5_[Rattus_norvegicus]                                                | ----- | ----- | ----- | ----- |
| znt6_[Ciona_intestinalis]                                               | ----- | ----- | ----- | ----- |
| znt6_[Danio_rerio]                                                      | ----- | ----- | ----- | ----- |
| znt6_human                                                              | ----- | ----- | ----- | ----- |
| znt6_[Rattus_norvegicus]                                                | ----- | ----- | ----- | ----- |
| znt6_isoform1_[Mus_musculus]                                            | ----- | ----- | ----- | ----- |
| znt6_isoform2_[Mus_musculus]                                            | ----- | ----- | ----- | ----- |
| znt4_[Danio_rerio]                                                      | ----- | ----- | ----- | ----- |
| cationtransporter1_[Candidatus_Micrarchaeota_archaeon]                  | ----- | ----- | ----- | ----- |
| transporter_[Geopsychrobacter_electrodiphilus]                          | ----- | ----- | ----- | ----- |
| cationtransporter2_[Candidatus_Micrarchaeota_archaeon]                  | ----- | ----- | ----- | ----- |
| znt10_[Danio_rerio]                                                     | ----- | ----- | ----- | ----- |
| znt10_human                                                             | ----- | ----- | ----- | ----- |
| znt10_[Mus_musculus]                                                    | ----- | ----- | ----- | ----- |
| znt10_[Rattus_norvegicus]                                               | ----- | ----- | ----- | ----- |
| znt1-likel1_[Hydra_vulgaris]                                            | ----- | ----- | ----- | ----- |
| znt1_[Ciona_intestinalis]                                               | ----- | ----- | ----- | ----- |
| znt1a_[Danio_rerio]                                                     | ----- | ----- | ----- | ----- |
| znt1_human                                                              | ----- | ----- | ----- | ----- |

  

|  |                     |       |     |       |        |
|--|---------------------|-------|-----|-------|--------|
|  | PLR <b>T</b> VLVFEH | ----- | GEH | ----- | VLVSMF |
|  | PLRS <b>L</b> LLFEH | ----- | SDL | ----- | VVISLL |
|  | PLRT <b>L</b> LLFEH | ----- | SDI | ----- | VVISLL |
|  | PLRT <b>L</b> LLFEH | ----- | SDI | ----- | VVISLL |
|  | PLRT <b>L</b> LLFEH | ----- | SDI | ----- | VVISLL |

znt1\_[Mus\_musculus]  
znt1\_[Rattus\_norvegicus]  
znt1\_isoformG\_[Drosophila\_melanogaster]  
znt1\_isoformF\_[Drosophila\_melanogaster]  
znt1-like2\_[Hydra\_vulgaris]

-----  
-----  
-----  
-----  
-----

|                                                |       |       |       |       |       |
|------------------------------------------------|-------|-------|-------|-------|-------|
| znt4_human                                     | ----- | ----- | ----- | ----- | ----- |
| znt4_[Rattus_norvegicus]                       | ----- | ----- | ----- | ----- | ----- |
| znt4_isoforma_[Mus_musculus]                   | ----- | ----- | ----- | ----- | ----- |
| znt4_isoformb_[Mus_musculus]                   | ----- | ----- | ----- | ----- | ----- |
| znt8_human                                     | ----- | ----- | ----- | ----- | ----- |
| znt8_[Mus_musculus]                            | ----- | ----- | ----- | ----- | ----- |
| znt8_[Rattus_norvegicus]                       | ----- | ----- | ----- | ----- | ----- |
| znt3_human                                     | ----- | ----- | ----- | ----- | ----- |
| znt3_[Rattus_norvegicus]                       | ----- | ----- | ----- | ----- | ----- |
| znt3_isoform1_[Mus_musculus]                   | ----- | ----- | ----- | ----- | ----- |
| znt3_isoform2_[Mus_musculus]                   | ----- | ----- | ----- | ----- | ----- |
| znt2-like_[Hydra_vulgaris]                     | ----- | ----- | ----- | ----- | ----- |
| znt35C_[Drosophila_melanogaster]               | ----- | ----- | ----- | ----- | ----- |
| znt2_[Ciona_intestinalis]                      | ----- | ----- | ----- | ----- | ----- |
| znt8_[Danio_rerio]                             | ----- | ----- | ----- | ----- | ----- |
| znt2_[Danio_rerio]                             | ----- | ----- | ----- | ----- | ----- |
| znt3_isoformX1_[Danio_rerio]                   | ----- | ----- | ----- | ----- | ----- |
| znt2_human                                     | ----- | ----- | ----- | ----- | ----- |
| znt2_isoform1_[Mus_musculus]                   | ----- | ----- | ----- | ----- | ----- |
| znt2_isoform2_[Mus_musculus]                   | ----- | ----- | ----- | ----- | ----- |
| znt2_isoform1_[Rattus_norvegicus]              | ----- | ----- | ----- | ----- | ----- |
| znt2_isoform2_[Rattus_norvegicus]              | ----- | ----- | ----- | ----- | ----- |
| znt9-like_[Hydra_vulgaris]                     | ----- | ----- | ----- | ----- | ----- |
| znt9_[Drosophila_melanogaster]                 | ----- | ----- | ----- | ----- | ----- |
| znt9-like_[Ciona_intestinalis]                 | ----- | ----- | ----- | ----- | ----- |
| znt9_[Danio_rerio]                             | ----- | ----- | ----- | ----- | ----- |
| znt9_human                                     | ----- | ----- | ----- | ----- | ----- |
| znt9_[Rattus_norvegicus]                       | ----- | ----- | ----- | ----- | ----- |
| isoform1_znt9_[Mus_musculus]                   | ----- | ----- | ----- | ----- | ----- |
| isoform2_znt9_[Mus_musculus]                   | ----- | ----- | ----- | ----- | ----- |
| znt9like_[E.Coli_partial]                      | ----- | ----- | ----- | ----- | ----- |
| znt9like_[Rhodanobacter_glycinis]              | ----- | ----- | ----- | ----- | ----- |
| znt9like_[Dyella_ginsengisoli]                 | ----- | ----- | ----- | ----- | ----- |
| znt9like2_[Actinobacteria_bacterium]           | ----- | ----- | ----- | ----- | ----- |
| znt9like_[Firmicutes_bacterium]                | ----- | ----- | ----- | ----- | ----- |
| znt9-like3_[Candidatus_Micrarchaeota_archaeon] | ----- | ----- | ----- | ----- | ----- |
| znt9like_[Mesorhizobium_sp._L2C054A000]        | ----- | ----- | ----- | ----- | ----- |
| znt9like_[Geopsychrobacter_electrodiphilus]    | ----- | ----- | ----- | ----- | ----- |
| znt9like_[Sneathiella_limimaris]               | ----- | ----- | ----- | ----- | ----- |
| znt9like_[Sneathiella_sp]                      | ----- | ----- | ----- | ----- | ----- |
| znt9like_[Sneathiella_chungangensis]           | ----- | ----- | ----- | ----- | ----- |
| znt9like_[Leptolyngbya_foveolarum]             | ----- | ----- | ----- | ----- | ----- |
| znt9like_[Massilia_sp._LC238]                  | ----- | ----- | ----- | ----- | ----- |
| znt9like1_[Variovorax_paradoxus]               | ----- | ----- | ----- | ----- | ----- |
| znt9like2_[Variovorax_paradoxus]               | ----- | ----- | ----- | ----- | ----- |
| znt9like_[Nitrosospira_sp._Nsp11]              | ----- | ----- | ----- | ----- | ----- |
| znt9like_[Sorangium_cellulosum]                | ----- | ----- | ----- | ----- | ----- |
| znt9like1_[Actinobacteria_bacterium]           | ----- | ----- | ----- | ----- | ----- |
| znt9like_[Phormidesmis_priestleyi]             | ----- | ----- | ----- | ----- | ----- |
| znt9like1_[Nosdoc_punctiforme]                 | ----- | ----- | ----- | ----- | ----- |
| znt9like2_[Nosdoc_punctiforme]                 | ----- | ----- | ----- | ----- | ----- |
| znt9like_[Nostoc_calcicola]                    | ----- | ----- | ----- | ----- | ----- |
| znt9like_[Nostoc_commune]                      | ----- | ----- | ----- | ----- | ----- |
| znt9like_[Nostoc_piscinale]                    | ----- | ----- | ----- | ----- | ----- |

|                                                                         |         |       |       |       |
|-------------------------------------------------------------------------|---------|-------|-------|-------|
| znt9like_[Nostoc_cycadae]                                               | -----   | ----- | ----- | ----- |
| znt9like_[Myxosarcina_sp._GI1]                                          | -----   | ----- | ----- | ----- |
| znt9like_[Chondrocystis_sp._NIES-4102]                                  | -----   | ----- | ----- | ----- |
| znt9like_[Pleurocapsa_sp._PCC_7319]                                     | -----   | ----- | ----- | ----- |
| znt33D_[Drosophila_melanogaster]                                        | -----   | ----- | ----- | ----- |
| transporter_[Pleurocapsa_sp._PCC_7319]                                  | -----   | ----- | ----- | ----- |
| transporter_[Leptolyngbya_foveolarum]                                   | -----   | ----- | ----- | ----- |
| transporter_[Myxosarcina_sp._GI1]                                       | -----   | ----- | ----- | ----- |
| transporter_[Chondrocystis_sp._NIES-4102]                               | -----   | ----- | ----- | ----- |
| transporter_[Phormidesmis_priestleyi]                                   | -----   | ----- | ----- | ----- |
| transporter_[Nostoc_piscinale]                                          | -----   | ----- | ----- | ----- |
| transporter_[Nostoc_punctiforme]                                        | -----   | ----- | ----- | ----- |
| transporter_[Nostoc_caldicola]                                          | -----   | ----- | ----- | ----- |
| cationtransporter3_[Firmicutes_bacterium]                               | -----   | ----- | ----- | ----- |
| c.e.p_[Firmicutes_bacterium]                                            | -----   | ----- | ----- | ----- |
| cationtransporter1_[Firmicutes_bacterium]                               | -----   | ----- | ----- | ----- |
| cationtransporter2_[Firmicutes_bacterium]                               | -----   | ----- | ----- | ----- |
| cationtransporter1_[Actinobacteria_bacterium]                           | -----   | ----- | ----- | ----- |
| cationtransporter2_[Actinobacteria_bacterium]                           | -----   | ----- | ----- | ----- |
| c.e.p_[Candidatus_Woeseearchaeota_archaeon_CG08_land_8_20_14_0_20_43_7] | -----   | ----- | ----- | ----- |
| transporter_[E.Coli]                                                    | -----   | ----- | ----- | ----- |
| znt9-like2_[Candidatus_Micrarchaeota_archaeon]                          | -----   | ----- | ----- | ----- |
| znt9-like_[Candidatus_Pacearchaeota_archaeon]                           | -----   | ----- | ----- | ----- |
| znt9-like_[Candidatus_Aenigmarchaeota_archaeon_ex4484_52]               | -----   | ----- | ----- | ----- |
| znt9-likel1_[Candidatus_Micrarchaeota_archaeon]                         | -----   | ----- | ----- | ----- |
| znt9-like4_[Candidatus_Micrarchaeota_archaeon]                          | -----   | ----- | ----- | ----- |
| znt9-like_[Candidatus_Woeseearchaeota_archaeon]                         | -----   | ----- | ----- | ----- |
| znt7_[Drosophila_melanogaster]                                          | -----   | ----- | ----- | ----- |
| znt7_[Danio_rerio]                                                      | -----   | ----- | ----- | ----- |
| znt7_human                                                              | -----   | ----- | ----- | ----- |
| znt7_[Mus_musculus]                                                     | -----   | ----- | ----- | ----- |
| znt7_[Rattus_norvegicus]                                                | -----   | ----- | ----- | ----- |
| znt5-like_[Ciona_intestinalis]                                          | -----   | ----- | ----- | ----- |
| znt5_[Danio_rerio]                                                      | -----   | ----- | ----- | ----- |
| znt5_human                                                              | -----   | ----- | ----- | ----- |
| znt5_[Mus_musculus]                                                     | -----   | ----- | ----- | ----- |
| znt5_[Rattus_norvegicus]                                                | -----   | ----- | ----- | ----- |
| znt6_[Ciona_intestinalis]                                               | -----   | ----- | ----- | ----- |
| znt6_[Danio_rerio]                                                      | -----   | ----- | ----- | ----- |
| znt6_human                                                              | -----   | ----- | ----- | ----- |
| znt6_[Rattus_norvegicus]                                                | -----   | ----- | ----- | ----- |
| znt6_isoform1_[Mus_musculus]                                            | -----   | ----- | ----- | ----- |
| znt6_isoform2_[Mus_musculus]                                            | -----   | ----- | ----- | ----- |
| znt4_[Danio_rerio]                                                      | -----   | ----- | ----- | ----- |
| cationtransporter1_[Candidatus_Micrarchaeota_archaeon]                  | -----   | ----- | ----- | ----- |
| transporter_[Geopsychrobacter_electrodiphilus]                          | -----   | ----- | ----- | ----- |
| cationtransporter2_[Candidatus_Micrarchaeota_archaeon]                  | -----   | ----- | ----- | ----- |
| znt10_[Danio_rerio]                                                     | -----   | ----- | ----- | ----- |
| znt10_human                                                             | -----   | ----- | ----- | ----- |
| znt10_[Mus_musculus]                                                    | -----   | ----- | ----- | ----- |
| znt10_[Rattus_norvegicus]                                               | -----   | ----- | ----- | ----- |
| znt1-likel1_[Hydra_vulgaris]                                            | -----   | ----- | ----- | ----- |
| znt1_[Ciona_intestinalis]                                               | -----   | ----- | ----- | ----- |
| znt1a_[Danio_rerio]                                                     | -----   | ----- | ----- | ----- |
| znt1_human                                                              | -----   | ----- | ----- | ----- |
| znt5_[Danio_rerio]                                                      | MGVFAGR | ----- | KGNY  | ----- |
| znt5_human                                                              | SVLFTSS | ----- | GGGP  | ----- |
| znt5_[Mus_musculus]                                                     | SVLFTSS | ----- | GGGP  | ----- |
| znt5_[Rattus_norvegicus]                                                | SVLFTSS | ----- | GGGP  | ----- |
| znt6_[Ciona_intestinalis]                                               | SVLFTSS | ----- | GGGP  | ----- |

znt1\_[Mus\_musculus]  
znt1\_[Rattus\_norvegicus]  
znt1\_isoformG\_[Drosophila\_melanogaster]  
znt1\_isoformF\_[Drosophila\_melanogaster]  
znt1-like2\_[Hydra\_vulgaris]

-----  
-----  
-----  
-----  
-----

|                                                |  |  |     |      |
|------------------------------------------------|--|--|-----|------|
| znt4_human                                     |  |  |     |      |
| znt4_[Rattus_norvegicus]                       |  |  |     |      |
| znt4_isoforma_[Mus_musculus]                   |  |  |     |      |
| znt4_isoformb_[Mus_musculus]                   |  |  |     |      |
| znt8_human                                     |  |  |     |      |
| znt8_[Mus_musculus]                            |  |  |     |      |
| znt8_[Rattus_norvegicus]                       |  |  |     |      |
| znt3_human                                     |  |  |     |      |
| znt3_[Rattus_norvegicus]                       |  |  |     |      |
| znt3_isoform1_[Mus_musculus]                   |  |  |     |      |
| znt3_isoform2_[Mus_musculus]                   |  |  |     |      |
| znt2-like_[Hydra_vulgaris]                     |  |  |     |      |
| znt35C_[Drosophila_melanogaster]               |  |  |     |      |
| znt2_[Ciona_intestinalis]                      |  |  |     |      |
| znt8_[Danio_rerio]                             |  |  | MSV | FSEP |
| znt2_[Danio_rerio]                             |  |  |     | ALEK |
| znt3_isoformX1_[Danio_rerio]                   |  |  |     |      |
| znt2_human                                     |  |  |     |      |
| znt2_isoform1_[Mus_musculus]                   |  |  |     |      |
| znt2_isoform2_[Mus_musculus]                   |  |  |     |      |
| znt2_isoform1_[Rattus_norvegicus]              |  |  |     |      |
| znt2_isoform2_[Rattus_norvegicus]              |  |  |     |      |
| znt9-like_[Hydra_vulgaris]                     |  |  |     |      |
| znt9_[Drosophila_melanogaster]                 |  |  |     |      |
| znt9-like_[Ciona_intestinalis]                 |  |  |     |      |
| znt9_[Danio_rerio]                             |  |  |     |      |
| znt9_human                                     |  |  |     |      |
| znt9_[Rattus_norvegicus]                       |  |  |     |      |
| isoform1_znt9_[Mus_musculus]                   |  |  |     |      |
| isoform2_znt9_[Mus_musculus]                   |  |  |     |      |
| znt9like_[E.Coli_partial]                      |  |  |     |      |
| znt9like_[Rhodanobacter_glycinis]              |  |  |     |      |
| znt9like_[Dyella_ginsengisoli]                 |  |  |     |      |
| znt9like2_[Actinobacteria_bacterium]           |  |  |     |      |
| znt9like_[Firmicutes_bacterium]                |  |  |     |      |
| znt9-like3_[Candidatus_Micrarchaeota_archaeon] |  |  |     |      |
| znt9like_[Mesorhizobium_sp._L2C054A000]        |  |  |     |      |
| znt9like_[Geopsychrobacter_electrodiphilus]    |  |  |     |      |
| znt9like_[Sneathiella_limimaris]               |  |  |     |      |
| znt9like_[Sneathiella_sp]                      |  |  |     |      |
| znt9like_[Sneathiella_chungangensis]           |  |  |     |      |
| znt9like_[Leptolyngbya_foveolarum]             |  |  |     |      |
| znt9like_[Massilia_sp._LC238]                  |  |  |     |      |
| znt9like1_[Variovorax_paradoxus]               |  |  |     |      |
| znt9like2_[Variovorax_paradoxus]               |  |  |     |      |
| znt9like_[Nitrosospira_sp._Nsp11]              |  |  |     |      |
| znt9like_[Sorangium_cellulosum]                |  |  |     |      |
| znt9like1_[Actinobacteria_bacterium]           |  |  |     |      |
| znt9like_[Phormidesmis_priestleyi]             |  |  |     |      |
| znt9like1_[Nosdoc_punctiforme]                 |  |  |     |      |
| znt9like2_[Nosdoc_punctiforme]                 |  |  |     |      |
| znt9like_[Nostoc_calcicola]                    |  |  |     |      |
| znt9like_[Nostoc_commune]                      |  |  |     |      |
| znt9like_[Nostoc_piscinale]                    |  |  |     |      |



|                                                                         |       |                       |       |                     |       |
|-------------------------------------------------------------------------|-------|-----------------------|-------|---------------------|-------|
| znt9like_[Nostoc_cycadae]                                               | ----- | -----                 | ----- | -----               | ----- |
| znt9like_[Myxosarcina_sp._GI1]                                          | ----- | -----                 | ----- | -----               | ----- |
| znt9like_[Chondrocystis_sp._NIES-4102]                                  | ----- | -----                 | ----- | -----               | ----- |
| znt9like_[Pleurocapsa_sp._PCC_7319]                                     | ----- | -----                 | ----- | -----               | ----- |
| znt33D_[Drosophila_melanogaster]                                        | ----- | -----                 | ----- | -----               | ----- |
| transporter_[Pleurocapsa_sp._PCC_7319]                                  | ----- | -----                 | ----- | -----               | ----- |
| transporter_[Leptolyngbya_foveolarum]                                   | ----- | -----                 | ----- | -----               | ----- |
| transporter_[Myxosarcina_sp._GI1]                                       | ----- | -----                 | ----- | -----               | ----- |
| transporter_[Chondrocystis_sp._NIES-4102]                               | ----- | -----                 | ----- | -----               | ----- |
| transporter_[Phormidesmis_priestleyi]                                   | ----- | -----                 | ----- | -----               | ----- |
| transporter_[Nostoc_piscinale]                                          | ----- | -----                 | ----- | -----               | ----- |
| transporter_[Nostoc_punctiforme]                                        | ----- | -----                 | ----- | -----               | ----- |
| transporter_[Nostoc_caldicola]                                          | ----- | -----                 | ----- | -----               | ----- |
| cationtransporter3_[Firmicutes_bacterium]                               | ----- | -----                 | ----- | -----               | ----- |
| c.e.p_[Firmicutes_bacterium]                                            | ----- | -----                 | ----- | -----               | ----- |
| cationtransporter1_[Firmicutes_bacterium]                               | ----- | -----                 | ----- | -----               | ----- |
| cationtransporter2_[Firmicutes_bacterium]                               | ----- | -----                 | ----- | -----               | ----- |
| cationtransporter1_[Actinobacteria_bacterium]                           | ----- | -----                 | ----- | -----               | ----- |
| cationtransporter2_[Actinobacteria_bacterium]                           | ----- | -----                 | ----- | -----               | ----- |
| c.e.p_[Candidatus_Woeseearchaeota_archaeon_CG08_land_8_20_14_0_20_43_7] | ----- | -----                 | ----- | -----               | ----- |
| transporter_[E.Coli]                                                    | ----- | -----                 | ----- | -----               | ----- |
| znt9-like2_[Candidatus_Micrarchaeota_archaeon]                          | ----- | -----                 | ----- | -----               | ----- |
| znt9-like_[Candidatus_Pacearchaeota_archaeon]                           | ----- | -----                 | ----- | -----               | ----- |
| znt9-like_[Candidatus_Aenigmarchaeota_archaeon_ex4484_52]               | ----- | -----                 | ----- | -----               | ----- |
| znt9-likel1_[Candidatus_Micrarchaeota_archaeon]                         | ----- | -----                 | ----- | -----               | ----- |
| znt9-like4_[Candidatus_Micrarchaeota_archaeon]                          | ----- | -----                 | ----- | -----               | ----- |
| znt9-like_[Candidatus_Woeseearchaeota_archaeon]                         | ----- | -----                 | ----- | -----               | ----- |
| znt7_[Drosophila_melanogaster]                                          | ----- | -----                 | ----- | -----               | ----- |
| znt7_[Danio_rerio]                                                      | ----- | -----                 | ----- | -----               | ----- |
| znt7_human                                                              | ----- | -----                 | ----- | -----               | ----- |
| znt7_[Mus_musculus]                                                     | ----- | -----                 | ----- | -----               | ----- |
| znt7_[Rattus_norvegicus]                                                | ----- | -----                 | ----- | -----               | ----- |
| znt5-like_[Ciona_intestinalis]                                          | ----- | AKTR GSLFFFLGVL CLLFD | ----- | NDDMLSKI LSQPEGQHTS | ----- |
| znt5_[Danio_rerio]                                                      | ----- | SKTR GAFFIIAVI CLLFD  | ----- | NDDLMAKM AEHPEGHHDS | ----- |
| znt5_human                                                              | ----- | AKTR GAFFIIAVI CLLFD  | ----- | NDDLMAKM AEHPEGHHDS | ----- |
| znt5_[Mus_musculus]                                                     | ----- | AKTR GAFFIIAVI CLLFD  | ----- | NDDLMAKM AEHPEGHHDS | ----- |
| znt5_[Rattus_norvegicus]                                                | ----- | AKTR GAFFIIAVI CLLFD  | ----- | NDDLMAKM AEHPEGHHDS | ----- |
| znt6_[Ciona_intestinalis]                                               | ----- | -----                 | ----- | -----               | ----- |
| znt6_[Danio_rerio]                                                      | ----- | -----                 | ----- | -----               | ----- |
| znt6_human                                                              | ----- | -----                 | ----- | -----               | ----- |
| znt6_[Rattus_norvegicus]                                                | ----- | -----                 | ----- | -----               | ----- |
| znt6_isoform1_[Mus_musculus]                                            | ----- | -----                 | ----- | -----               | ----- |
| znt6_isoform2_[Mus_musculus]                                            | ----- | -----                 | ----- | -----               | ----- |
| znt4_[Danio_rerio]                                                      | ----- | -----                 | ----- | -----               | ----- |
| cationtransporter1_[Candidatus_Micrarchaeota_archaeon]                  | ----- | -----                 | ----- | -----               | ----- |
| transporter_[Geopsychrobacter_electrodiphilus]                          | ----- | -----                 | ----- | -----               | ----- |
| cationtransporter2_[Candidatus_Micrarchaeota_archaeon]                  | ----- | -----                 | ----- | -----               | ----- |
| znt10_[Danio_rerio]                                                     | ----- | -----                 | ----- | -----               | ----- |
| znt10_human                                                             | ----- | -----                 | ----- | -----               | ----- |
| znt10_[Mus_musculus]                                                    | ----- | -----                 | ----- | -----               | ----- |
| znt10_[Rattus_norvegicus]                                               | ----- | -----                 | ----- | -----               | ----- |
| znt1-likel1_[Hydra_vulgaris]                                            | ----- | -----                 | ----- | -----               | ----- |
| znt1_[Ciona_intestinalis]                                               | ----- | -----                 | ----- | -----               | ----- |
| znt1a_[Danio_rerio]                                                     | ----- | -----                 | ----- | -----               | ----- |
| znt1_human                                                              | ----- | -----                 | ----- | -----               | ----- |

znt1\_[Mus\_musculus]  
znt1\_[Rattus\_norvegicus]  
znt1\_isoformG\_[Drosophila\_melanogaster]  
znt1\_isoformF\_[Drosophila\_melanogaster]  
znt1-like2\_[Hydra\_vulgaris]

-----  
-----  
-----  
-----  
-----





znt1\_[Mus\_musculus]  
znt1\_[Rattus\_norvegicus]  
znt1\_isoformG\_[Drosophila\_melanogaster]  
znt1\_isoformF\_[Drosophila\_melanogaster]  
znt1-like2\_[Hydra\_vulgaris]

-----  
-----  
-----  
-----  
-----

|                                                |       |     |            |            |       |
|------------------------------------------------|-------|-----|------------|------------|-------|
| znt4_human                                     |       |     |            |            |       |
| znt4_[Rattus_norvegicus]                       |       |     |            |            |       |
| znt4_isoforma_[Mus_musculus]                   |       |     |            |            |       |
| znt4_isoformb_[Mus_musculus]                   |       |     |            |            |       |
| znt8_human                                     |       |     |            |            |       |
| znt8_[Mus_musculus]                            |       |     |            |            |       |
| znt8_[Rattus_norvegicus]                       |       |     |            |            |       |
| znt3_human                                     |       |     |            |            |       |
| znt3_[Rattus_norvegicus]                       |       |     |            |            |       |
| znt3_isoform1_[Mus_musculus]                   |       |     |            |            |       |
| znt3_isoform2_[Mus_musculus]                   |       |     |            |            |       |
| znt2-like_[Hydra_vulgaris]                     |       |     |            |            |       |
| znt35C_[Drosophila_melanogaster]               |       |     |            |            |       |
| znt2_[Ciona_intestinalis]                      |       |     | MSFAKPEY   | IQNFL      | DEK   |
| znt8_[Danio_rerio]                             | KAQVS | RKL | TFLYLANDVI | QNSKRKGPEF | TQDFA |
| znt2_[Danio_rerio]                             |       |     |            |            | PVIVD |
| znt3_isoformX1_[Danio_rerio]                   |       |     |            |            |       |
| znt2_human                                     |       |     |            |            |       |
| znt2_isoform1_[Mus_musculus]                   |       |     |            |            |       |
| znt2_isoform2_[Mus_musculus]                   |       |     |            |            |       |
| znt2_isoform1_[Rattus_norvegicus]              |       |     |            |            |       |
| znt2_isoform2_[Rattus_norvegicus]              |       |     |            |            |       |
| znt9-like_[Hydra_vulgaris]                     |       |     |            |            |       |
| znt9_[Drosophila_melanogaster]                 | LRQDG |     |            |            |       |
| znt9-like_[Ciona_intestinalis]                 | KLIG  |     |            |            |       |
| znt9_[Danio_rerio]                             | VYLOQ |     |            |            |       |
| znt9_human                                     | LRLRC |     |            |            |       |
| znt9_[Rattus_norvegicus]                       | LGGG  |     |            |            |       |
| isoform1_znt9_[Mus_musculus]                   | LGGG  |     |            |            |       |
| isoform2_znt9_[Mus_musculus]                   | LGGG  |     |            |            |       |
| znt9like_[E.Coli_partial]                      |       |     |            |            |       |
| znt9like_[Rhodanobacter_glycinis]              |       |     |            |            |       |
| znt9like_[Dyella_ginsengisoli]                 |       |     |            |            |       |
| znt9like2_[Actinobacteria_bacterium]           |       |     |            |            |       |
| znt9like_[Firmicutes_bacterium]                |       |     |            |            |       |
| znt9-like3_[Candidatus_Micrarchaeota_archaeon] |       |     |            |            |       |
| znt9like_[Mesorhizobium_sp._L2C054A000]        |       |     |            |            |       |
| znt9like_[Geopsychrobacter_electrodiphilus]    |       |     |            |            |       |
| znt9like_[Sneathiella_limimaris]               |       |     |            |            |       |
| znt9like_[Sneathiella_sp]                      |       |     |            |            |       |
| znt9like_[Sneathiella_chungangensis]           |       |     |            |            |       |
| znt9like_[Leptolyngbya_foveolarum]             |       |     |            |            |       |
| znt9like_[Massilia_sp._LC238]                  |       |     |            |            |       |
| znt9like1_[Variovorax_paradoxus]               |       |     |            |            |       |
| znt9like2_[Variovorax_paradoxus]               |       |     |            |            |       |
| znt9like_[Nitrosospira_sp._Nsp11]              |       |     |            |            |       |
| znt9like_[Sorangium_cellulosum]                |       |     |            |            |       |
| znt9like1_[Actinobacteria_bacterium]           |       |     |            |            |       |
| znt9like_[Phormidesmis_priestleyi]             |       |     |            |            |       |
| znt9like1_[Nosdoc_punctiforme]                 |       |     |            |            |       |
| znt9like2_[Nosdoc_punctiforme]                 |       |     |            |            |       |
| znt9like_[Nostoc_calcicola]                    |       |     |            |            |       |
| znt9like_[Nostoc_commune]                      |       |     |            |            |       |
| znt9like_[Nostoc_piscinale]                    |       |     |            |            |       |

|                                                                         |       |       |       |       |
|-------------------------------------------------------------------------|-------|-------|-------|-------|
| znt9like_[Nostoc_cycadae]                                               | ----- | ----- | ----- | ----- |
| znt9like_[Myxosarcina_sp._GI1]                                          | ----- | ----- | ----- | ----- |
| znt9like_[Chondrocystis_sp._NIES-4102]                                  | ----- | ----- | ----- | ----- |
| znt9like_[Pleurocapsa_sp._PCC_7319]                                     | ----- | ----- | ----- | ----- |
| znt33D_[Drosophila_melanogaster]                                        | ----- | ----- | ----- | ----- |
| transporter_[Pleurocapsa_sp._PCC_7319]                                  | ----- | ----- | ----- | ----- |
| transporter_[Leptolyngbya_foveolarum]                                   | ----- | ----- | ----- | ----- |
| transporter_[Myxosarcina_sp._GI1]                                       | ----- | ----- | ----- | ----- |
| transporter_[Chondrocystis_sp._NIES-4102]                               | ----- | ----- | ----- | ----- |
| transporter_[Phormidesmis_priestleyi]                                   | ----- | ----- | ----- | ----- |
| transporter_[Nostoc_piscinale]                                          | ----- | ----- | ----- | ----- |
| transporter_[Nosdoc_punctiforme]                                        | ----- | ----- | ----- | ----- |
| transporter_[Nostoc_caldicola]                                          | ----- | ----- | ----- | ----- |
| cationtransporter3_[Firmicutes_bacterium]                               | ----- | ----- | ----- | ----- |
| c.e.p_[Firmicutes_bacterium]                                            | ----- | ----- | ----- | ----- |
| cationtransporter1_[Firmicutes_bacterium]                               | ----- | ----- | ----- | ----- |
| cationtransporter2_[Firmicutes_bacterium]                               | ----- | ----- | ----- | ----- |
| cationtransporter1_[Actinobacteria_bacterium]                           | ----- | ----- | ----- | ----- |
| cationtransporter2_[Actinobacteria_bacterium]                           | ----- | ----- | ----- | ----- |
| c.e.p_[Candidatus_Woeseearchaeota_archaeon_CG08_land_8_20_14_0_20_43_7] | ----- | ----- | ----- | ----- |
| transporter_[E.Coli]                                                    | ----- | ----- | ----- | ----- |
| znt9-like2_[Candidatus_Micrarchaeota_archaeon]                          | ----- | ----- | ----- | ----- |
| znt9-like_[Candidatus_Pacearchaeota_archaeon]                           | ----- | ----- | ----- | ----- |
| znt9-like_[Candidatus_Aenigmarchaeota_archaeon_ex4484_52]               | ----- | ----- | ----- | ----- |
| znt9-likel1_[Candidatus_Micrarchaeota_archaeon]                         | ----- | ----- | ----- | ----- |
| znt9-like4_[Candidatus_Micrarchaeota_archaeon]                          | ----- | ----- | ----- | ----- |
| znt9-like_[Candidatus_Woeseearchaeota_archaeon]                         | ----- | ----- | ----- | ----- |
| znt7_[Drosophila_melanogaster]                                          | ----- | ----- | ----- | ----- |
| znt7_[Danio_rerio]                                                      | ----- | ----- | ----- | ----- |
| znt7_human                                                              | ----- | ----- | ----- | ----- |
| znt7_[Mus_musculus]                                                     | ----- | ----- | ----- | ----- |
| znt7_[Rattus_norvegicus]                                                | ----- | ----- | ----- | ----- |
| znt5-like_[Ciona_intestinalis]                                          | ----- | ----- | ----- | ----- |
| znt5_[Danio_rerio]                                                      | ----- | ----- | ----- | ----- |
| znt5_human                                                              | ----- | ----- | ----- | ----- |
| znt5_[Mus_musculus]                                                     | ----- | ----- | ----- | ----- |
| znt5_[Rattus_norvegicus]                                                | ----- | ----- | ----- | ----- |
| znt6_[Ciona_intestinalis]                                               | ----- | ----- | ----- | ----- |
| znt6_[Danio_rerio]                                                      | ----- | ----- | ----- | ----- |
| znt6_human                                                              | ----- | ----- | ----- | ----- |
| znt6_[Rattus_norvegicus]                                                | ----- | ----- | ----- | ----- |
| znt6_isoform1_[Mus_musculus]                                            | ----- | ----- | ----- | ----- |
| znt6_isoform2_[Mus_musculus]                                            | ----- | ----- | ----- | ----- |
| znt4_[Danio_rerio]                                                      | ----- | ----- | ----- | ----- |
| cationtransporter1_[Candidatus_Micrarchaeota_archaeon]                  | ----- | ----- | ----- | ----- |
| transporter_[Geopsychrobacter_electrodiphilus]                          | ----- | ----- | ----- | ----- |
| cationtransporter2_[Candidatus_Micrarchaeota_archaeon]                  | ----- | ----- | ----- | ----- |
| znt10_[Danio_rerio]                                                     | ----- | ----- | ----- | ----- |
| znt10_human                                                             | ----- | ----- | ----- | ----- |
| znt10_[Mus_musculus]                                                    | ----- | ----- | ----- | ----- |
| znt10_[Rattus_norvegicus]                                               | ----- | ----- | ----- | ----- |
| znt1-likel1_[Hydra_vulgaris]                                            | ----- | ----- | ----- | ----- |
| znt1_[Ciona_intestinalis]                                               | ----- | ----- | ----- | ----- |
| znt1a_[Danio_rerio]                                                     | ----- | ----- | ----- | ----- |
| znt1_human                                                              | ----- | ----- | ----- | ----- |

znt1\_[Mus\_musculus]  
znt1\_[Rattus\_norvegicus]  
znt1\_isoformG\_[Drosophila\_melanogaster]  
znt1\_isoformF\_[Drosophila\_melanogaster]  
znt1-like2\_[Hydra\_vulgaris]

-----  
-----  
-----  
-----  
-----



|                                                |      |       |           |            |
|------------------------------------------------|------|-------|-----------|------------|
| znt4_human                                     |      |       |           |            |
| znt4_[Rattus_norvegicus]                       |      |       |           |            |
| znt4_isoforma_[Mus_musculus]                   |      |       |           |            |
| znt4_isoformb_[Mus_musculus]                   |      |       |           |            |
| znt8_human                                     |      |       |           |            |
| znt8_[Mus_musculus]                            |      |       |           |            |
| znt8_[Rattus_norvegicus]                       |      |       |           |            |
| znt3_human                                     |      |       |           |            |
| znt3_[Rattus_norvegicus]                       |      |       |           |            |
| znt3_isoform1_[Mus_musculus]                   |      |       |           |            |
| znt3_isoform2_[Mus_musculus]                   |      |       |           |            |
| znt2-like_[Hydra_vulgaris]                     |      |       |           |            |
| znt35C_[Drosophila_melanogaster]               |      |       |           |            |
| znt2_[Ciona_intestinalis]                      | F    |       |           |            |
| znt8_[Danio_rerio]                             | AFKH | VS    | SGGDESCKK | HLGRV      |
| znt2_[Danio_rerio]                             |      |       |           | LSIWQERAVY |
| znt3_isoformX1_[Danio_rerio]                   |      |       |           |            |
| znt2_human                                     |      |       |           |            |
| znt2_isoform1_[Mus_musculus]                   |      |       |           |            |
| znt2_isoform2_[Mus_musculus]                   |      |       |           |            |
| znt2_isoform1_[Rattus_norvegicus]              |      |       |           |            |
| znt2_isoform2_[Rattus_norvegicus]              |      |       |           |            |
| znt9-like_[Hydra_vulgaris]                     |      |       |           |            |
| znt9_[Drosophila_melanogaster]                 |      | RNPWR | RH        | DGEAFK     |
| znt9-like_[Ciona_intestinalis]                 |      |       |           | LQPWKRPSTF |
| znt9_[Danio_rerio]                             |      | RAPLS | QRS       | SKISKP     |
| znt9_human                                     |      | RAAAC | NPS       | D          |
| znt9_[Rattus_norvegicus]                       |      | PAV   | ARG       | R          |
| isoform1_znt9_[Mus_musculus]                   |      | RAA   | TRG       | R          |
| isoform2_znt9_[Mus_musculus]                   |      | RAA   | TRG       | R          |
| znt9like_[E.Coli_partial]                      |      |       |           | SQGWKNLMTF |
| znt9like_[Rhodanobacter_glycinis]              |      |       |           | SQGWKNVMTF |
| znt9like_[Dyella_ginsengisoli]                 |      |       |           | SQGWKNVMTF |
| znt9like2_[Actinobacteria_bacterium]           |      |       |           |            |
| znt9like_[Firmicutes_bacterium]                |      |       |           |            |
| znt9-like3_[Candidatus_Micrarchaeota_archaeon] |      |       |           |            |
| znt9like_[Mesorhizobium_sp._L2C054A000]        |      |       |           |            |
| znt9like_[Geopsychrobacter_electrodiphilus]    |      |       |           |            |
| znt9like_[Sneathiella_limimaris]               |      |       |           |            |
| znt9like_[Sneathiella_sp]                      |      |       |           |            |
| znt9like_[Sneathiella_chungangensis]           |      |       |           |            |
| znt9like_[Leptolyngbya_foveolarum]             |      |       |           |            |
| znt9like_[Massilia_sp._LC238]                  |      |       |           |            |
| znt9like1_[Variovorax_paradoxus]               |      |       |           |            |
| znt9like2_[Variovorax_paradoxus]               |      |       |           |            |
| znt9like_[Nitrosospira_sp._Nsp11]              |      |       |           |            |
| znt9like_[Sorangium_cellulosum]                |      |       |           |            |
| znt9like1_[Actinobacteria_bacterium]           |      |       |           |            |
| znt9like_[Phormidesmis_priestleyi]             |      |       |           |            |
| znt9like1_[Nosdoc_punctiforme]                 |      |       |           |            |
| znt9like2_[Nosdoc_punctiforme]                 |      |       |           |            |
| znt9like_[Nostoc_calcicola]                    |      |       |           |            |
| znt9like_[Nostoc_commune]                      |      |       |           |            |
| znt9like_[Nostoc_piscinale]                    |      |       |           |            |

|                                                                         |       |       |       |       |
|-------------------------------------------------------------------------|-------|-------|-------|-------|
| znt9like_[Nostoc_cycadae]                                               | ----- | ----- | ----- | ----- |
| znt9like_[Myxosarcina_sp._GI1]                                          | ----- | ----- | ----- | ----- |
| znt9like_[Chondrocystis_sp._NIES-4102]                                  | ----- | ----- | ----- | ----- |
| znt9like_[Pleurocapsa_sp._PCC_7319]                                     | ----- | ----- | ----- | ----- |
| znt33D_[Drosophila_melanogaster]                                        | ----- | ----- | ----- | ----- |
| transporter_[Pleurocapsa_sp._PCC_7319]                                  | ----- | ----- | ----- | ----- |
| transporter_[Leptolyngbya_foveolarum]                                   | ----- | ----- | ----- | ----- |
| transporter_[Myxosarcina_sp._GI1]                                       | ----- | ----- | ----- | ----- |
| transporter_[Chondrocystis_sp._NIES-4102]                               | ----- | ----- | ----- | ----- |
| transporter_[Phormidesmis_priestleyi]                                   | ----- | ----- | ----- | ----- |
| transporter_[Nostoc_piscinale]                                          | ----- | ----- | ----- | ----- |
| transporter_[Nostoc_punctiforme]                                        | ----- | ----- | ----- | ----- |
| transporter_[Nostoc_caldicola]                                          | ----- | ----- | ----- | ----- |
| cationtransporter3_[Firmicutes_bacterium]                               | ----- | ----- | ----- | ----- |
| c.e.p_[Firmicutes_bacterium]                                            | ----- | ----- | ----- | ----- |
| cationtransporter1_[Firmicutes_bacterium]                               | ----- | ----- | ----- | ----- |
| cationtransporter2_[Firmicutes_bacterium]                               | ----- | ----- | ----- | ----- |
| cationtransporter1_[Actinobacteria_bacterium]                           | ----- | ----- | ----- | ----- |
| cationtransporter2_[Actinobacteria_bacterium]                           | ----- | ----- | ----- | ----- |
| c.e.p_[Candidatus_Woeseearchaeota_archaeon_CG08_land_8_20_14_0_20_43_7] | ----- | ----- | ----- | ----- |
| transporter_[E.Coli]                                                    | ----- | ----- | ----- | ----- |
| znt9-like2_[Candidatus_Micrarchaeota_archaeon]                          | ----- | ----- | ----- | ----- |
| znt9-like_[Candidatus_Pacearchaeota_archaeon]                           | ----- | ----- | ----- | ----- |
| znt9-like_[Candidatus_Aenigmarchaeota_archaeon_ex4484_52]               | ----- | ----- | ----- | ----- |
| znt9-likel1_[Candidatus_Micrarchaeota_archaeon]                         | ----- | ----- | ----- | ----- |
| znt9-like4_[Candidatus_Micrarchaeota_archaeon]                          | ----- | ----- | ----- | ----- |
| znt9-like_[Candidatus_Woeseearchaeota_archaeon]                         | ----- | ----- | ----- | ----- |
| znt7_[Drosophila_melanogaster]                                          | ----- | ----- | ----- | ----- |
| znt7_[Danio_rerio]                                                      | ----- | ----- | ----- | ----- |
| znt7_human                                                              | ----- | ----- | ----- | ----- |
| znt7_[Mus_musculus]                                                     | ----- | ----- | ----- | ----- |
| znt7_[Rattus_norvegicus]                                                | ----- | ----- | ----- | ----- |
| znt5-like_[Ciona_intestinalis]                                          | ----- | ----- | ----- | ----- |
| znt5_[Danio_rerio]                                                      | ----- | ----- | ----- | ----- |
| znt5_human                                                              | ----- | ----- | ----- | ----- |
| znt5_[Mus_musculus]                                                     | ----- | ----- | ----- | ----- |
| znt5_[Rattus_norvegicus]                                                | ----- | ----- | ----- | ----- |
| znt6_[Ciona_intestinalis]                                               | ----- | ----- | ----- | ----- |
| znt6_[Danio_rerio]                                                      | ----- | ----- | ----- | ----- |
| znt6_human                                                              | ----- | ----- | ----- | ----- |
| znt6_[Rattus_norvegicus]                                                | ----- | ----- | ----- | ----- |
| znt6_isoform1_[Mus_musculus]                                            | ----- | ----- | ----- | ----- |
| znt6_isoform2_[Mus_musculus]                                            | ----- | ----- | ----- | ----- |
| znt4_[Danio_rerio]                                                      | ----- | ----- | ----- | ----- |
| cationtransporter1_[Candidatus_Micrarchaeota_archaeon]                  | ----- | ----- | ----- | ----- |
| transporter_[Geopsychrobacter_electrodiphilus]                          | ----- | ----- | ----- | ----- |
| cationtransporter2_[Candidatus_Micrarchaeota_archaeon]                  | ----- | ----- | ----- | ----- |
| znt10_[Danio_rerio]                                                     | ----- | ----- | ----- | ----- |
| znt10_human                                                             | ----- | ----- | ----- | ----- |
| znt10_[Mus_musculus]                                                    | ----- | ----- | ----- | ----- |
| znt10_[Rattus_norvegicus]                                               | ----- | ----- | ----- | ----- |
| znt1-likel1_[Hydra_vulgaris]                                            | ----- | ----- | ----- | ----- |
| znt1_[Ciona_intestinalis]                                               | ----- | ----- | ----- | ----- |
| znt1a_[Danio_rerio]                                                     | ----- | ----- | ----- | ----- |
| znt1_human                                                              | ----- | ----- | ----- | ----- |

MSKKSL KRQDEHTKD

NDCEE

znt1\_[Mus\_musculus]  
znt1\_[Rattus\_norvegicus]  
znt1\_isoformG\_[Drosophila\_melanogaster]  
znt1\_isoformF\_[Drosophila\_melanogaster]  
znt1-like2\_[Hydra\_vulgaris]

-----  
-----  
-----  
-----  
-----

|                                                |            |            |            |            |            |
|------------------------------------------------|------------|------------|------------|------------|------------|
| znt4_human                                     | -----      | -----      | -----      | -----      |            |
| znt4_[Rattus_norvegicus]                       | -----      | -----      | -----      | -----      |            |
| znt4_isoforma_[Mus_musculus]                   | -----      | -----      | -----      | -----      |            |
| znt4_isoformb_[Mus_musculus]                   | -----      | -----      | -----      | -----      |            |
| znt8_human                                     | -----      | -----      | -----      | -----      |            |
| znt8_[Mus_musculus]                            | -----      | -----      | -----      | -----      |            |
| znt8_[Rattus_norvegicus]                       | -----      | -----      | -----      | -----      |            |
| znt3_human                                     | -----      | -----      | -----      | -----      |            |
| znt3_[Rattus_norvegicus]                       | -----      | -----      | -----      | -----      |            |
| znt3_isoform1_[Mus_musculus]                   | -----      | -----      | -----      | -----      |            |
| znt3_isoform2_[Mus_musculus]                   | -----      | -----      | -----      | -----      |            |
| znt2-like_[Hydra_vulgaris]                     | -----      | -----      | -----      | -----      |            |
| znt35C_[Drosophila_melanogaster]               | -----      | -----      | -----      | -----      |            |
| znt2_[Ciona_intestinalis]                      | -----      | -----      | -----      | -----      |            |
| znt8_[Danio_rerio]                             | ENDIL      | -----      | -----      | -----      |            |
| znt2_[Danio_rerio]                             | -----      | -----      | -----      | -----      |            |
| znt3_isoformX1_[Danio_rerio]                   | -----      | -----      | -----      | -----      |            |
| znt2_human                                     | -----      | -----      | -----      | -----      |            |
| znt2_isoform1_[Mus_musculus]                   | -----      | -----      | -----      | -----      |            |
| znt2_isoform2_[Mus_musculus]                   | -----      | -----      | -----      | -----      |            |
| znt2_isoform1_[Rattus_norvegicus]              | -----      | -----      | -----      | -----      |            |
| znt2_isoform2_[Rattus_norvegicus]              | -----      | -----      | -----      | -----      |            |
| znt9-like_[Hydra_vulgaris]                     | -----      | -----      | -----      | -----      |            |
| znt9_[Drosophila_melanogaster]                 | LQFRCSANGS | DSKKEKPVQE | EATAGPVAKP | KETKNFEVKT | TKGILSISTT |
| znt9-like_[Ciona_intestinalis]                 | PRFCHQ     | -----      | -----      | -----      | -----      |
| znt9_[Danio_rerio]                             | HKLWFS     | -----      | -----      | -----      | -----      |
| znt9_human                                     | GSFSNM     | -----      | -----      | -----      | -----      |
| znt9_[Rattus_norvegicus]                       | ESFTSM     | -----      | -----      | -----      | -----      |
| isoform1_znt9_[Mus_musculus]                   | ESFTYV     | -----      | -----      | -----      | -----      |
| isoform2_znt9_[Mus_musculus]                   | ESFTYV     | -----      | -----      | -----      | -----      |
| znt9like_[E.Coli_partial]                      | -----      | -----      | -----      | -----      | -----      |
| znt9like_[Rhodanobacter_glycinis]              | -----      | -----      | -----      | -----      | -----      |
| znt9like_[Dyella_ginsengisoli]                 | -----      | -----      | -----      | -----      | -----      |
| znt9like2_[Actinobacteria_bacterium]           | -----      | -----      | -----      | -----      | -----      |
| znt9like_[Firmicutes_bacterium]                | -----      | -----      | -----      | -----      | -----      |
| znt9-like3_[Candidatus_Micrarchaeota_archaeon] | -----      | -----      | -----      | -----      | -----      |
| znt9like_[Mesorhizobium_sp._L2C054A000]        | -----      | -----      | -----      | -----      | -----      |
| znt9like_[Geopsychrobacter_electrodiphilus]    | -----      | -----      | -----      | -----      | -----      |
| znt9like_[Sneathiella_limimaris]               | -----      | -----      | -----      | -----      | -----      |
| znt9like_[Sneathiella_sp]                      | -----      | -----      | -----      | -----      | -----      |
| znt9like_[Sneathiella_chungangensis]           | -----      | -----      | -----      | -----      | -----      |
| znt9like_[Leptolyngbya_foveolarum]             | -----      | -----      | -----      | -----      | -----      |
| znt9like_[Massilia_sp._LC238]                  | -----      | -----      | -----      | -----      | -----      |
| znt9like1_[Variovorax_paradoxus]               | -----      | -----      | -----      | -----      | -----      |
| znt9like2_[Variovorax_paradoxus]               | -----      | -----      | -----      | -----      | -----      |
| znt9like_[Nitrosospira_sp._Nsp11]              | -----      | -----      | -----      | -----      | -----      |
| znt9like_[Sorangium_cellulosum]                | -----      | -----      | -----      | -----      | -----      |
| znt9like1_[Actinobacteria_bacterium]           | -----      | -----      | -----      | -----      | -----      |
| znt9like_[Phormidesmis_priestleyi]             | -----      | -----      | -----      | -----      | -----      |
| znt9like1_[Nosdoc_punctiforme]                 | -----      | -----      | -----      | -----      | -----      |
| znt9like2_[Nosdoc_punctiforme]                 | -----      | -----      | -----      | -----      | -----      |
| znt9like_[Nostoc_calcicola]                    | -----      | -----      | -----      | -----      | -----      |
| znt9like_[Nostoc_commune]                      | -----      | -----      | -----      | -----      | -----      |
| znt9like_[Nostoc_piscinale]                    | -----      | -----      | -----      | -----      | -----      |

|                                                                         |       |       |       |       |
|-------------------------------------------------------------------------|-------|-------|-------|-------|
| znt9like_[Nostoc_cycadae]                                               | ----- | ----- | ----- | ----- |
| znt9like_[Myxosarcina_sp._GI1]                                          | ----- | ----- | ----- | ----- |
| znt9like_[Chondrocystis_sp._NIES-4102]                                  | ----- | ----- | ----- | ----- |
| znt9like_[Pleurocapsa_sp._PCC_7319]                                     | ----- | ----- | ----- | ----- |
| znt33D_[Drosophila_melanogaster]                                        | ----- | ----- | ----- | ----- |
| transporter_[Pleurocapsa_sp._PCC_7319]                                  | ----- | ----- | ----- | ----- |
| transporter_[Leptolyngbya_foveolarum]                                   | ----- | ----- | ----- | ----- |
| transporter_[Myxosarcina_sp._GI1]                                       | ----- | ----- | ----- | ----- |
| transporter_[Chondrocystis_sp._NIES-4102]                               | ----- | ----- | ----- | ----- |
| transporter_[Phormidesmis_priestleyi]                                   | ----- | ----- | ----- | ----- |
| transporter_[Nostoc_piscinale]                                          | ----- | ----- | ----- | ----- |
| transporter_[Nostoc_punctiforme]                                        | ----- | ----- | ----- | ----- |
| transporter_[Nostoc_caldicola]                                          | ----- | ----- | ----- | ----- |
| cationtransporter3_[Firmicutes_bacterium]                               | ----- | ----- | ----- | ----- |
| c.e.p_[Firmicutes_bacterium]                                            | ----- | ----- | ----- | ----- |
| cationtransporter1_[Firmicutes_bacterium]                               | ----- | ----- | ----- | ----- |
| cationtransporter2_[Firmicutes_bacterium]                               | ----- | ----- | ----- | ----- |
| cationtransporter1_[Actinobacteria_bacterium]                           | ----- | ----- | ----- | ----- |
| cationtransporter2_[Actinobacteria_bacterium]                           | ----- | ----- | ----- | ----- |
| c.e.p_[Candidatus_Woeseearchaeota_archaeon_CG08_land_8_20_14_0_20_43_7] | ----- | ----- | ----- | ----- |
| transporter_[E.Coli]                                                    | ----- | ----- | ----- | ----- |
| znt9-like2_[Candidatus_Micrarchaeota_archaeon]                          | ----- | ----- | ----- | ----- |
| znt9-like_[Candidatus_Pacearchaeota_archaeon]                           | ----- | ----- | ----- | ----- |
| znt9-like_[Candidatus_Aenigmarchaeota_archaeon_ex4484_52]               | ----- | ----- | ----- | ----- |
| znt9-likel1_[Candidatus_Micrarchaeota_archaeon]                         | ----- | ----- | ----- | ----- |
| znt9-like4_[Candidatus_Micrarchaeota_archaeon]                          | ----- | ----- | ----- | ----- |
| znt9-like_[Candidatus_Woeseearchaeota_archaeon]                         | ----- | ----- | ----- | ----- |
| znt7_[Drosophila_melanogaster]                                          | ----- | ----- | ----- | ----- |
| znt7_[Danio_rerio]                                                      | ----- | ----- | ----- | ----- |
| znt7_human                                                              | ----- | ----- | ----- | ----- |
| znt7_[Mus_musculus]                                                     | ----- | ----- | ----- | ----- |
| znt7_[Rattus_norvegicus]                                                | ----- | ----- | ----- | ----- |
| znt5-like_[Ciona_intestinalis]                                          | ----- | ----- | ----- | ----- |
| znt5_[Danio_rerio]                                                      | ----- | ----- | ----- | ----- |
| znt5_human                                                              | ----- | ----- | ----- | ----- |
| znt5_[Mus_musculus]                                                     | ----- | ----- | ----- | ----- |
| znt5_[Rattus_norvegicus]                                                | ----- | ----- | ----- | ----- |
| znt6_[Ciona_intestinalis]                                               | ----- | ----- | ----- | ----- |
| znt6_[Danio_rerio]                                                      | ----- | ----- | ----- | ----- |
| znt6_human                                                              | ----- | ----- | ----- | ----- |
| znt6_[Rattus_norvegicus]                                                | ----- | ----- | ----- | ----- |
| znt6_isoform1_[Mus_musculus]                                            | ----- | ----- | ----- | ----- |
| znt6_isoform2_[Mus_musculus]                                            | ----- | ----- | ----- | ----- |
| znt4_[Danio_rerio]                                                      | ----- | ----- | ----- | ----- |
| cationtransporter1_[Candidatus_Micrarchaeota_archaeon]                  | ----- | ----- | ----- | ----- |
| transporter_[Geopsychrobacter_electrodiphilus]                          | ----- | ----- | ----- | ----- |
| cationtransporter2_[Candidatus_Micrarchaeota_archaeon]                  | ----- | ----- | ----- | ----- |
| znt10_[Danio_rerio]                                                     | ----- | ----- | ----- | ----- |
| znt10_human                                                             | ----- | ----- | ----- | ----- |
| znt10_[Mus_musculus]                                                    | ----- | ----- | ----- | ----- |
| znt10_[Rattus_norvegicus]                                               | ----- | ----- | ----- | ----- |
| znt1-likel1_[Hydra_vulgaris]                                            | ----- | ----- | ----- | ----- |
| znt1_[Ciona_intestinalis]                                               | ----- | ----- | ----- | ----- |
| znt1a_[Danio_rerio]                                                     | ----- | ----- | ----- | ----- |
| znt1_human                                                              | ----- | ----- | ----- | ----- |

znt1\_[Mus\_musculus]  
znt1\_[Rattus\_norvegicus]  
znt1\_isoformG\_[Drosophila\_melanogaster]  
znt1\_isoformF\_[Drosophila\_melanogaster]  
znt1-like2\_[Hydra\_vulgaris]

-----  
-----  
-----  
-----  
-----

|                                                |                       |     |            |             |
|------------------------------------------------|-----------------------|-----|------------|-------------|
| znt4_human                                     |                       |     |            |             |
| znt4_[Rattus_norvegicus]                       |                       |     |            |             |
| znt4_isoforma_[Mus_musculus]                   |                       |     |            |             |
| znt4_isoformb_[Mus_musculus]                   |                       |     |            |             |
| znt8_human                                     |                       |     |            |             |
| znt8_[Mus_musculus]                            |                       |     |            |             |
| znt8_[Rattus_norvegicus]                       |                       |     |            |             |
| znt3_human                                     |                       |     |            |             |
| znt3_[Rattus_norvegicus]                       |                       |     |            |             |
| znt3_isoform1_[Mus_musculus]                   |                       |     |            |             |
| znt3_isoform2_[Mus_musculus]                   |                       |     |            |             |
| znt2-like_[Hydra_vulgaris]                     |                       |     |            |             |
| znt35C_[Drosophila_melanogaster]               |                       |     |            |             |
| znt2_[Ciona_intestinalis]                      |                       |     |            |             |
| znt8_[Danio_rerio]                             |                       | DKL | ADV LQ     | VEKKA KQ KR |
| znt2_[Danio_rerio]                             |                       |     |            | OK RP       |
| znt3_isoformX1_[Danio_rerio]                   |                       |     |            |             |
| znt2_human                                     |                       |     |            |             |
| znt2_isoform1_[Mus_musculus]                   |                       |     |            |             |
| znt2_isoform2_[Mus_musculus]                   |                       |     |            |             |
| znt2_isoform1_[Rattus_norvegicus]              |                       |     |            |             |
| znt2_isoform2_[Rattus_norvegicus]              |                       |     |            |             |
| znt9-like_[Hydra_vulgaris]                     |                       |     |            |             |
| znt9_[Drosophila_melanogaster]                 | MSCRG YGVL YKND       |     | LLKQIFKKT  | SLLKLLKRTL  |
| znt9-like_[Ciona_intestinalis]                 | IEDSKINEIV FEKSDLPPVT |     | KVKEPVLAA  | SAINL RST   |
| znt9_[Danio_rerio]                             | VT YK                 | KTP | SMWKTTLDSF | NSRSL HVS   |
| znt9_human                                     | FPDFR                 | VTS | LTWTQV     | QNC         |
| znt9_[Rattus_norvegicus]                       | VPCSH                 | PYI | GTLSQV     | KLY         |
| isoform1_znt9_[Mus_musculus]                   | IPSIH                 | PQI | SVLNQV     | KLY         |
| isoform2_znt9_[Mus_musculus]                   | VPDIH                 | PHL | SIINQV     | KLY         |
| znt9like_[E.Coli_partial]                      | VPDIH                 | PHL | SIINQV     | KLY         |
| znt9like_[Rhodanobacter_glycinis]              |                       |     |            |             |
| znt9like_[Dyella_ginsengisoli]                 |                       |     |            |             |
| znt9like2_[Actinobacteria_bacterium]           |                       |     |            |             |
| znt9like_[Firmicutes_bacterium]                |                       |     |            |             |
| znt9-like3_[Candidatus_Micrarchaeota_archaeon] |                       |     |            |             |
| znt9like_[Mesorhizobium_sp._L2C054A000]        |                       |     |            |             |
| znt9like_[Geopsychrobacter_electrodiphilus]    |                       |     |            |             |
| znt9like_[Sneathiella_limimaris]               |                       |     |            |             |
| znt9like_[Sneathiella_sp]                      |                       |     |            |             |
| znt9like_[Sneathiella_chungangensis]           |                       |     |            |             |
| znt9like_[Leptolyngbya_foveolarum]             |                       |     |            |             |
| znt9like_[Massilia_sp._LC238]                  |                       |     |            |             |
| znt9like1_[Variovorax_paradoxus]               |                       |     |            |             |
| znt9like2_[Variovorax_paradoxus]               |                       |     |            |             |
| znt9like_[Nitrosospira_sp._Nsp11]              |                       |     |            |             |
| znt9like_[Sorangium_cellulosum]                |                       |     |            |             |
| znt9like1_[Actinobacteria_bacterium]           |                       |     |            |             |
| znt9like_[Phormidesmis_priestleyi]             |                       |     |            |             |
| znt9like1_[Nosdoc_punctiforme]                 |                       |     |            |             |
| znt9like2_[Nosdoc_punctiforme]                 |                       |     |            |             |
| znt9like_[Nostoc_calcicola]                    |                       |     |            |             |
| znt9like_[Nostoc_commune]                      |                       |     |            |             |
| znt9like_[Nostoc_piscinale]                    |                       |     |            |             |

|                                                                         |       |        |            |            |
|-------------------------------------------------------------------------|-------|--------|------------|------------|
| znt9like_[Nostoc_cycadae]                                               | ----- | -----  | -----      | -----      |
| znt9like_[Myxosarcina_sp._GI1]                                          | ----- | -----  | -----      | -----      |
| znt9like_[Chondrocystis_sp._NIES-4102]                                  | ----- | -----  | -----      | -----      |
| znt9like_[Pleurocapsa_sp._PCC_7319]                                     | ----- | -----  | -----      | -----      |
| znt33D_[Drosophila_melanogaster]                                        | ----- | -----  | -----      | -----      |
| transporter_[Pleurocapsa_sp._PCC_7319]                                  | ----- | EDEEEL | QAATREMVKI | PDIDITPRKS |
| transporter_[Leptolyngbya_foveolarum]                                   | ----- | -----  | -----      | -----      |
| transporter_[Myxosarcina_sp._GI1]                                       | ----- | -----  | -----      | -----      |
| transporter_[Chondrocystis_sp._NIES-4102]                               | ----- | -----  | -----      | -----      |
| transporter_[Phormidesmis_priestleyi]                                   | ----- | -----  | -----      | -----      |
| transporter_[Nostoc_piscinale]                                          | ----- | -----  | -----      | -----      |
| transporter_[Nosdoc_punctiforme]                                        | ----- | -----  | -----      | -----      |
| transporter_[Nostoc_caldicola]                                          | ----- | -----  | -----      | -----      |
| cationtransporter3_[Firmicutes_bacterium]                               | ----- | -----  | -----      | -----      |
| c.e.p_[Firmicutes_bacterium]                                            | ----- | -----  | -----      | -----      |
| cationtransporter1_[Firmicutes_bacterium]                               | ----- | -----  | -----      | -----      |
| cationtransporter2_[Firmicutes_bacterium]                               | ----- | -----  | -----      | -----      |
| cationtransporter1_[Actinobacteria_bacterium]                           | ----- | -----  | -----      | -----      |
| cationtransporter2_[Actinobacteria_bacterium]                           | ----- | -----  | -----      | -----      |
| c.e.p_[Candidatus_Woeseearchaeota_archaeon_CG08_land_8_20_14_0_20_43_7] | ----- | -----  | -----      | -----      |
| transporter_[E.Coli]                                                    | ----- | -----  | -----      | -----      |
| znt9-like2_[Candidatus_Micrarchaeota_archaeon]                          | ----- | -----  | -----      | -----      |
| znt9-like_[Candidatus_Pacearchaeota_archaeon]                           | ----- | -----  | -----      | -----      |
| znt9-like_[Candidatus_Aenigmarchaeota_archaeon_ex4484_52]               | ----- | -----  | -----      | -----      |
| znt9-likel1_[Candidatus_Micrarchaeota_archaeon]                         | ----- | -----  | -----      | -----      |
| znt9-like4_[Candidatus_Micrarchaeota_archaeon]                          | ----- | -----  | -----      | -----      |
| znt9-like_[Candidatus_Woeseearchaeota_archaeon]                         | ----- | -----  | -----      | -----      |
| znt7_[Drosophila_melanogaster]                                          | ----- | -----  | -----      | -----      |
| znt7_[Danio_rerio]                                                      | ----- | -----  | -----      | -----      |
| znt7_human                                                              | ----- | -----  | -----      | -----      |
| znt7_[Mus_musculus]                                                     | ----- | -----  | -----      | -----      |
| znt7_[Rattus_norvegicus]                                                | ----- | -----  | -----      | -----      |
| znt5-like_[Ciona_intestinalis]                                          | ----- | -----  | -----      | -----      |
| znt5_[Danio_rerio]                                                      | ----- | -----  | -----      | -----      |
| znt5_human                                                              | ----- | -----  | -----      | -----      |
| znt5_[Mus_musculus]                                                     | ----- | -----  | -----      | -----      |
| znt5_[Rattus_norvegicus]                                                | ----- | -----  | -----      | -----      |
| znt6_[Ciona_intestinalis]                                               | ----- | -----  | -----      | -----      |
| znt6_[Danio_rerio]                                                      | ----- | -----  | -----      | -----      |
| znt6_human                                                              | ----- | -----  | -----      | -----      |
| znt6_[Rattus_norvegicus]                                                | ----- | -----  | -----      | -----      |
| znt6_isoform1_[Mus_musculus]                                            | ----- | -----  | -----      | -----      |
| znt6_isoform2_[Mus_musculus]                                            | ----- | -----  | -----      | -----      |
| znt4_[Danio_rerio]                                                      | ----- | -----  | -----      | -----      |
| cationtransporter1_[Candidatus_Micrarchaeota_archaeon]                  | ----- | -----  | -----      | -----      |
| transporter_[Geopsychrobacter_electrodiphilus]                          | ----- | -----  | -----      | -----      |
| cationtransporter2_[Candidatus_Micrarchaeota_archaeon]                  | ----- | -----  | -----      | -----      |
| znt10_[Danio_rerio]                                                     | ----- | -----  | -----      | -----      |
| znt10_human                                                             | ----- | -----  | -----      | -----      |
| znt10_[Mus_musculus]                                                    | ----- | -----  | -----      | -----      |
| znt10_[Rattus_norvegicus]                                               | ----- | -----  | -----      | -----      |
| znt1-likel1_[Hydra_vulgaris]                                            | ----- | -----  | -----      | -----      |
| znt1_[Ciona_intestinalis]                                               | ----- | -----  | -----      | -----      |
| znt1a_[Danio_rerio]                                                     | ----- | -----  | -----      | -----      |
| znt1_human                                                              | ----- | -----  | -----      | -----      |



znt1\_[Mus\_musculus]  
znt1\_[Rattus\_norvegicus]  
znt1\_isoformG\_[Drosophila\_melanogaster]  
znt1\_isoformF\_[Drosophila\_melanogaster]  
znt1-like2\_[Hydra\_vulgaris]

-----  
-----  
-----  
-----  
-----

|                                                |            |            |            |            |            |       |       |           |
|------------------------------------------------|------------|------------|------------|------------|------------|-------|-------|-----------|
| znt4_human                                     | -----      | -----      | -----      | -----      |            |       |       |           |
| znt4_[Rattus_norvegicus]                       | -----      | -----      | -----      | -----      |            |       |       |           |
| znt4_isoforma_[Mus_musculus]                   | -----      | -----      | -----      | -----      |            |       |       |           |
| znt4_isoformb_[Mus_musculus]                   | -----      | -----      | -----      | -----      |            |       |       |           |
| znt8_human                                     | -----      | -----      | -----      | -----      |            |       |       |           |
| znt8_[Mus_musculus]                            | -----      | -----      | -----      | -----      |            |       |       |           |
| znt8_[Rattus_norvegicus]                       | -----      | -----      | -----      | -----      |            |       |       |           |
| znt3_human                                     | -----      | -----      | -----      | -----      |            |       |       |           |
| znt3_[Rattus_norvegicus]                       | -----      | -----      | -----      | -----      |            |       |       |           |
| znt3_isoform1_[Mus_musculus]                   | -----      | -----      | -----      | -----      |            |       |       |           |
| znt3_isoform2_[Mus_musculus]                   | -----      | -----      | -----      | -----      |            |       |       |           |
| znt2-like_[Hydra_vulgaris]                     | -----      | -----      | -----      | -----      |            |       |       |           |
| znt35C_[Drosophila_melanogaster]               | -----      | -----      | -----      | -----      |            |       |       |           |
| znt2_[Ciona_intestinalis]                      | NERITLLK   | DDFLSSEH   | DEHERDTASY | RKTGDSRNSS | NISESDENNL |       |       |           |
| znt8_[Danio_rerio]                             | YEEIKVNV   | DDFACOSS   | PAEPPQTADL | IRTLQE     | LENAA      |       |       |           |
| znt2_[Danio_rerio]                             | -----      | -----      | -----      | -----      |            |       |       |           |
| znt3_isoformX1_[Danio_rerio]                   | -----      | -----      | -----      | -----      |            |       |       |           |
| znt2_human                                     | -----      | -----      | -----      | -----      |            |       |       |           |
| znt2_isoform1_[Mus_musculus]                   | -----      | -----      | -----      | -----      |            |       |       |           |
| znt2_isoform2_[Mus_musculus]                   | -----      | -----      | -----      | -----      |            |       |       |           |
| znt2_isoform1_[Rattus_norvegicus]              | -----      | -----      | -----      | -----      |            |       |       |           |
| znt2_isoform2_[Rattus_norvegicus]              | -----      | -----      | -----      | -----      |            |       |       |           |
| znt9-like_[Hydra_vulgaris]                     | -----      | -----      | -----      | -----      |            |       |       |           |
| znt9_[Drosophila_melanogaster]                 | CDDVSTKNVE | I          | DKKTEIT    | PKP        | T          | DIV   |       |           |
| znt9-like_[Ciona_intestinalis]                 | STGVATGAVG | LGESSGSVMN | P          | PETVKSA    | PKN        | SPS   | GA    | VLAEKAGEG |
| znt9_[Danio_rerio]                             | SRILQTETT  | KSESK      | T          | ETV        | T          | E     | DKE   |           |
| znt9_human                                     | STS        | GSGKD      | GSPTR      | PEEPKTTEKA | QAA        | Q     | PAAKG |           |
| znt9_[Rattus_norvegicus]                       | STNVQKEGO  | GSQT       | LRVEKV     | PSF        | ETAEG      |       |       |           |
| isoform1_znt9_[Mus_musculus]                   | STNVQKGGQ  | GSQT       | PRTDKA     | PPL        | T          | QAAEN |       |           |
| isoform2_znt9_[Mus_musculus]                   | STNVQKGGQ  | GSQT       | PKADKV     | PSL        | T          | QTVEN |       |           |
| znt9like_[E.Coli_partial]                      | STNVQKGGQ  | GSQT       | PKADKV     | PSL        | T          | QTV   |       |           |
| znt9like_[Rhodanobacter_glycinis]              | -----      | -----      | -----      | -----      | -----      |       |       |           |
| znt9like_[Dyella_ginsengisoli]                 | -----      | -----      | -----      | -----      | -----      |       |       |           |
| znt9like2_[Actinobacteria_bacterium]           | -----      | -----      | -----      | -----      | -----      |       |       |           |
| znt9like_[Firmicutes_bacterium]                | -----      | -----      | -----      | -----      | -----      |       |       |           |
| znt9-like3_[Candidatus_Micrarchaeota_archaeon] | -----      | -----      | -----      | -----      | -----      |       |       |           |
| znt9like_[Mesorhizobium_sp._L2C054A000]        | -----      | -----      | -----      | -----      | -----      |       |       |           |
| znt9like_[Geopsychrobacter_electrodiphilus]    | -----      | -----      | -----      | -----      | -----      |       |       |           |
| znt9like_[Sneathiella_limimaris]               | -----      | -----      | -----      | -----      | -----      |       |       |           |
| znt9like_[Sneathiella_sp]                      | -----      | -----      | -----      | -----      | -----      |       |       |           |
| znt9like_[Sneathiella_chungangensis]           | -----      | -----      | -----      | -----      | -----      |       |       |           |
| znt9like_[Leptolyngbya_foveolarum]             | -----      | -----      | -----      | -----      | -----      |       |       |           |
| znt9like_[Massilia_sp._LC238]                  | -----      | -----      | -----      | -----      | -----      |       |       |           |
| znt9like1_[Variovorax_paradoxus]               | -----      | -----      | -----      | -----      | -----      |       |       |           |
| znt9like2_[Variovorax_paradoxus]               | -----      | -----      | -----      | -----      | -----      |       |       |           |
| znt9like_[Nitrosospira_sp._Nsp11]              | -----      | -----      | -----      | -----      | -----      |       |       |           |
| znt9like_[Sorangium_cellulosum]                | -----      | -----      | -----      | -----      | -----      |       |       |           |
| znt9likel1_[Actinobacteria_bacterium]          | -----      | -----      | -----      | -----      | -----      |       |       |           |
| znt9like_[Phormidesmis_priestleyi]             | -----      | -----      | -----      | -----      | -----      |       |       |           |
| znt9like1_[Nosdoc_punctiforme]                 | -----      | -----      | -----      | -----      | -----      |       |       |           |
| znt9like2_[Nosdoc_punctiforme]                 | -----      | -----      | -----      | -----      | -----      |       |       |           |
| znt9like_[Nostoc_calcicola]                    | -----      | -----      | -----      | -----      | -----      |       |       |           |
| znt9like_[Nostoc_commune]                      | -----      | -----      | -----      | -----      | -----      |       |       |           |
| znt9like_[Nostoc_piscinale]                    | -----      | -----      | -----      | -----      | -----      |       |       |           |

|                                                                         |            |        |  |    |
|-------------------------------------------------------------------------|------------|--------|--|----|
| znt9like_[Nostoc_cycadae]                                               |            |        |  |    |
| znt9like_[Myxosarcina_sp._GI1]                                          |            |        |  |    |
| znt9like_[Chondrocystis_sp._NIES-4102]                                  |            |        |  |    |
| znt9like_[Pleurocapsa_sp._PCC_7319]                                     |            |        |  |    |
| znt33D_[Drosophila_melanogaster]                                        | GNVLKKNHDE | RGSQTG |  | DG |
| transporter_[Pleurocapsa_sp._PCC_7319]                                  |            |        |  |    |
| transporter_[Leptolyngbya_foveolarum]                                   |            |        |  |    |
| transporter_[Myxosarcina_sp._GI1]                                       |            |        |  |    |
| transporter_[Chondrocystis_sp._NIES-4102]                               |            |        |  |    |
| transporter_[Phormidesmis_priestleyi]                                   |            |        |  |    |
| transporter_[Nostoc_piscinale]                                          |            |        |  |    |
| transporter_[Nostoc_punctiforme]                                        |            |        |  |    |
| transporter_[Nostoc_caldicola]                                          |            |        |  |    |
| cationtransporter3_[Firmicutes_bacterium]                               |            |        |  |    |
| c.e.p_[Firmicutes_bacterium]                                            |            |        |  |    |
| cationtransporter1_[Firmicutes_bacterium]                               |            |        |  |    |
| cationtransporter2_[Firmicutes_bacterium]                               |            |        |  |    |
| cationtransporter1_[Actinobacteria_bacterium]                           |            |        |  |    |
| cationtransporter2_[Actinobacteria_bacterium]                           |            |        |  |    |
| c.e.p_[Candidatus_Woeseearchaeota_archaeon_CG08_land_8_20_14_0_20_43_7] |            |        |  |    |
| transporter_[E.Coli]                                                    |            |        |  |    |
| znt9-like2_[Candidatus_Micrarchaeota_archaeon]                          |            |        |  |    |
| znt9-like_[Candidatus_Pacearchaeota_archaeon]                           |            |        |  |    |
| znt9-like_[Candidatus_Aenigmarchaeota_archaeon_ex4484_52]               |            |        |  |    |
| znt9-likel1_[Candidatus_Micrarchaeota_archaeon]                         |            |        |  |    |
| znt9-like4_[Candidatus_Micrarchaeota_archaeon]                          |            |        |  |    |
| znt9-like_[Candidatus_Woeseearchaeota_archaeon]                         |            |        |  |    |
| znt7_[Drosophila_melanogaster]                                          |            |        |  |    |
| znt7_[Danio_rerio]                                                      |            |        |  |    |
| znt7_human                                                              |            |        |  |    |
| znt7_[Mus_musculus]                                                     |            |        |  |    |
| znt7_[Rattus_norvegicus]                                                |            |        |  |    |
| znt5-like_[Ciona_intestinalis]                                          | KR         | VTHVG  |  | GA |
| znt5_[Danio_rerio]                                                      | RK         | LSVEIG |  | GA |
| znt5_human                                                              | RK         | LSVDVG |  | GA |
| znt5_[Mus_musculus]                                                     | RK         | LSIDVG |  | GA |
| znt5_[Rattus_norvegicus]                                                | RK         | LSIDVG |  | GA |
| znt6_[Ciona_intestinalis]                                               |            |        |  |    |
| znt6_[Danio_rerio]                                                      |            |        |  |    |
| znt6_human                                                              |            |        |  |    |
| znt6_[Rattus_norvegicus]                                                |            |        |  |    |
| znt6_isoform1_[Mus_musculus]                                            |            |        |  |    |
| znt6_isoform2_[Mus_musculus]                                            |            |        |  |    |
| znt4_[Danio_rerio]                                                      |            |        |  |    |
| cationtransporter1_[Candidatus_Micrarchaeota_archaeon]                  |            |        |  |    |
| transporter_[Geopsychrobacter_electrodiphilus]                          |            |        |  |    |
| cationtransporter2_[Candidatus_Micrarchaeota_archaeon]                  |            |        |  |    |
| znt10_[Danio_rerio]                                                     |            |        |  |    |
| znt10_human                                                             |            |        |  |    |
| znt10_[Mus_musculus]                                                    |            |        |  |    |
| znt10_[Rattus_norvegicus]                                               |            |        |  |    |
| znt1-likel1_[Hydra_vulgaris]                                            |            |        |  |    |
| znt1_[Ciona_intestinalis]                                               |            |        |  |    |
| znt1a_[Danio_rerio]                                                     |            |        |  |    |
| znt1_human                                                              |            |        |  |    |

znt1\_[Mus\_musculus]  
znt1\_[Rattus\_norvegicus]  
znt1\_isoformG\_[Drosophila\_melanogaster]  
znt1\_isoformF\_[Drosophila\_melanogaster]  
znt1-like2\_[Hydra\_vulgaris]

-----  
-----  
-----  
-----  
-----

|                                                |            |            |            |            |   |
|------------------------------------------------|------------|------------|------------|------------|---|
| znt4_human                                     |            |            |            |            |   |
| znt4_[Rattus_norvegicus]                       |            |            |            |            |   |
| znt4_isoforma_[Mus_musculus]                   |            |            |            |            |   |
| znt4_isoformb_[Mus_musculus]                   |            |            |            |            |   |
| znt8_human                                     |            |            |            |            |   |
| znt8_[Mus_musculus]                            |            |            |            |            |   |
| znt8_[Rattus_norvegicus]                       |            |            |            |            |   |
| znt3_human                                     |            |            |            |            |   |
| znt3_[Rattus_norvegicus]                       |            |            |            |            |   |
| znt3_isoform1_[Mus_musculus]                   |            |            |            |            |   |
| znt3_isoform2_[Mus_musculus]                   |            |            |            |            |   |
| znt2-like_[Hydra_vulgaris]                     |            |            |            |            |   |
| znt35C_[Drosophila_melanogaster]               |            |            |            |            |   |
| znt2_[Ciona_intestinalis]                      | PHDHSQHKT  | SSDADCEIDD | SLSL-SRKS  | ISSNSSFARR | A |
| znt8_[Danio_rerio]                             | SSDAALRKRI | SALPP-EVQ  |            | DTSLLHK    | V |
| znt2_[Danio_rerio]                             |            |            |            |            |   |
| znt3_isoformX1_[Danio_rerio]                   |            |            |            |            |   |
| znt2_human                                     |            |            |            |            |   |
| znt2_isoform1_[Mus_musculus]                   |            |            |            |            |   |
| znt2_isoform2_[Mus_musculus]                   |            |            |            |            |   |
| znt2_isoform1_[Rattus_norvegicus]              |            |            |            |            |   |
| znt2_isoform2_[Rattus_norvegicus]              |            |            |            |            |   |
| znt9-like_[Hydra_vulgaris]                     |            |            |            |            |   |
| znt9_[Drosophila_melanogaster]                 | VDKSSEKPFY |            | HKPRKIDYN  | IIYTK      |   |
| znt9-like_[Ciona_intestinalis]                 | IRTSP--PAE | V-TPPAP    | VIPLKRPRFD | YRASLE     |   |
| znt9_[Danio_rerio]                             | LDATNKKEDK | S-TIVSKMK  | TYMLKRRDYT | -KKYTD     |   |
| znt9_human                                     | AGSKPQGLTK | A-ESIQKV   | RAVLKKREYG | LKYTQ      |   |
| znt9_[Rattus_norvegicus]                       | IGTELKAPLK | Q-EPLOVRV  | KAVLKKREYG | SKYTQ      |   |
| isoform1_znt9_[Mus_musculus]                   | IGAELKAPLK | Q-DPLQVRV  | KAVLKKREYG | SKYTK      |   |
| isoform2_znt9_[Mus_musculus]                   | IGAELKAPLK | Q-DPLQVRV  | KAVLKKRDYG | SKYTK      |   |
| znt9like_[E.Coli_partial]                      |            |            | KAVLKKRDYG | SKYTK      |   |
| znt9like_[Rhodanobacter_glycinis]              |            |            |            |            |   |
| znt9like_[Dyella_ginsengisoli]                 |            |            |            |            |   |
| znt9like2_[Actinobacteria_bacterium]           |            |            |            |            |   |
| znt9like_[Firmicutes_bacterium]                |            |            |            |            |   |
| znt9-like3_[Candidatus_Micrarchaeota_archaeon] |            |            |            |            |   |
| znt9like_[Mesorhizobium_sp._L2C054A000]        |            |            |            |            |   |
| znt9like_[Geopsychrobacter_electrodiphilus]    |            |            |            |            |   |
| znt9like_[Sneathiella_limimaris]               |            |            |            |            |   |
| znt9like_[Sneathiella_sp]                      |            |            |            |            |   |
| znt9like_[Sneathiella_chungangensis]           |            |            |            |            |   |
| znt9like_[Leptolyngbya_foveolarum]             |            |            |            |            |   |
| znt9like_[Massilia_sp._LC238]                  |            |            |            |            |   |
| znt9like1_[Variovorax_paradoxus]               |            |            |            |            |   |
| znt9like2_[Variovorax_paradoxus]               |            |            |            |            |   |
| znt9like_[Nitrosospira_sp._Nsp11]              |            |            |            |            |   |
| znt9like_[Sorangium_cellulosum]                |            |            |            |            |   |
| znt9like1_[Actinobacteria_bacterium]           |            |            |            |            |   |
| znt9like_[Phormidesmis_priestleyi]             |            |            |            |            |   |
| znt9like1_[Nosdoc_punctiforme]                 |            |            |            |            |   |
| znt9like2_[Nosdoc_punctiforme]                 |            |            |            |            |   |
| znt9like_[Nostoc_calcicola]                    |            |            |            |            |   |
| znt9like_[Nostoc_commune]                      |            |            |            |            |   |
| znt9like_[Nostoc_piscinale]                    |            |            |            |            |   |

|                                                                         |            |           |            |            |            |
|-------------------------------------------------------------------------|------------|-----------|------------|------------|------------|
| znt9like_[Nostoc_cycadae]                                               | -----      | -----     | -----      | -----      | -----      |
| znt9like_[Myxosarcina_sp._GI1]                                          | -----      | -----     | -----      | -----      | -----      |
| znt9like_[Chondrocystis_sp._NIES-4102]                                  | -----      | -----     | -----      | -----      | -----      |
| znt9like_[Pleurocapsa_sp._PCC_7319]                                     | -----      | -----     | -----      | -----      | -----      |
| znt33D_[Drosophila_melanogaster]                                        | KDTTSKTRQK | KLESDDSWA | -ALL-RKRFA | WTKDNKTDAV | NQNIPTTKGS |
| transporter_[Pleurocapsa_sp._PCC_7319]                                  | -----      | -----     | -----      | -----      | -----      |
| transporter_[Leptolyngbya_foveolarum]                                   | -----      | -----     | -----      | -----      | -----      |
| transporter_[Myxosarcina_sp._GI1]                                       | -----      | -----     | -----      | -----      | -----      |
| transporter_[Chondrocystis_sp._NIES-4102]                               | -----      | -----     | -----      | -----      | -----      |
| transporter_[Phormidesmis_priestleyi]                                   | -----      | -----     | -----      | -----      | -----      |
| transporter_[Nostoc_piscinale]                                          | -----      | -----     | -----      | -----      | -----      |
| transporter_[Nosdoc_punctiforme]                                        | -----      | -----     | -----      | -----      | -----      |
| transporter_[Nostoc_caldicola]                                          | -----      | -----     | -----      | -----      | -----      |
| cationtransporter3_[Firmicutes_bacterium]                               | -----      | -----     | -----      | -----      | -----      |
| c.e.p_[Firmicutes_bacterium]                                            | -----      | -----     | -----      | -----      | -----      |
| cationtransporter1_[Firmicutes_bacterium]                               | -----      | -----     | -----      | -----      | -----      |
| cationtransporter2_[Firmicutes_bacterium]                               | -----      | -----     | -----      | -----      | -----      |
| cationtransporter1_[Actinobacteria_bacterium]                           | -----      | -----     | -----      | -----      | -----      |
| cationtransporter2_[Actinobacteria_bacterium]                           | -----      | -----     | -----      | -----      | -----      |
| c.e.p_[Candidatus_Woeseearchaeota_archaeon_CG08_land_8_20_14_0_20_43_7] | -----      | -----     | -----      | -----      | -----      |
| transporter_[E.Coli]                                                    | -----      | -----     | -----      | -----      | -----      |
| znt9-like2_[Candidatus_Micrarchaeota_archaeon]                          | -----      | -----     | -----      | -----      | -----      |
| znt9-like_[Candidatus_Pacearchaeota_archaeon]                           | -----      | -----     | -----      | -----      | -----      |
| znt9-like_[Candidatus_Aenigmarchaeota_archaeon_ex4484_52]               | -----      | -----     | -----      | -----      | -----      |
| znt9-like1_[Candidatus_Micrarchaeota_archaeon]                          | -----      | -----     | -----      | -----      | -----      |
| znt9-like4_[Candidatus_Micrarchaeota_archaeon]                          | -----      | -----     | -----      | -----      | -----      |
| znt9-like_[Candidatus_Woeseearchaeota_archaeon]                         | -----      | -----     | -----      | -----      | -----      |
| znt7_[Drosophila_melanogaster]                                          | -----      | -----     | -----      | -----      | -----      |
| znt7_[Danio_rerio]                                                      | -----      | -----     | -----      | -----      | -----      |
| znt7_human                                                              | -----      | -----     | -----      | -----      | -----      |
| znt7_[Mus_musculus]                                                     | -----      | -----     | -----      | -----      | -----      |
| znt7_[Rattus_norvegicus]                                                | -----      | -----     | -----      | -----      | -----      |
| znt5-like_[Ciona_intestinalis]                                          | KRLHAFSTLI | SALLLLPWA | -SLL-YF-TG | YSF--NLFSN | L--FS      |
| znt5_[Danio_rerio]                                                      | KRLYALSNLV | SAVLLLPWV | -IVL-SA-TT | ESKVESWSGL | I--FP      |
| znt5_human                                                              | KRLQALSHLV | SVLLLCPPW | -IVL-SV-TT | ESKVESWFSL | I--MP      |
| znt5_[Mus_musculus]                                                     | KRLQALSQLV | SVFLLCPWV | -IVL-SV-TT | ESKVESWFSL | I--MP      |
| znt5_[Rattus_norvegicus]                                                | KRLQALSQLV | SVFLLCPWV | -IVL-SV-TT | ESKIESWFPL | I--MP      |
| znt6_[Ciona_intestinalis]                                               | -----      | -----     | -----      | -----      | -----      |
| znt6_[Danio_rerio]                                                      | -----      | -----     | -----      | -----      | -----      |
| znt6_human                                                              | -----      | -----     | -----      | -----      | -----      |
| znt6_[Rattus_norvegicus]                                                | -----      | -----     | -----      | -----      | -----      |
| znt6_isoform1_[Mus_musculus]                                            | -----      | -----     | -----      | -----      | -----      |
| znt6_isoform2_[Mus_musculus]                                            | -----      | -----     | -----      | -----      | -----      |
| znt4_[Danio_rerio]                                                      | -----      | -----     | -----      | -----      | -----      |
| cationtransporter1_[Candidatus_Micrarchaeota_archaeon]                  | -----      | -----     | -----      | -----      | -----      |
| transporter_[Geopsychrobacter_electrodiphilus]                          | -----      | -----     | -----      | -----      | -----      |
| cationtransporter2_[Candidatus_Micrarchaeota_archaeon]                  | -----      | -----     | -----      | -----      | -----      |
| znt10_[Danio_rerio]                                                     | -----      | -----     | -----      | -----      | -----      |
| znt10_human                                                             | -----      | -----     | -----      | -----      | -----      |
| znt10_[Mus_musculus]                                                    | -----      | -----     | -----      | -----      | -----      |
| znt10_[Rattus_norvegicus]                                               | -----      | -----     | -----      | -----      | -----      |
| znt1-likel_[Hydra_vulgaris]                                             | -----      | -----     | -----      | -----      | -----      |
| znt1_[Ciona_intestinalis]                                               | -----      | -----     | -----      | -----      | -----      |
| znt1a_[Danio_rerio]                                                     | -----      | -----     | -----      | -----      | -----      |
| znt1_human                                                              | -----      | -----     | -----      | -----      | -----      |

znt1\_[Mus\_musculus]  
znt1\_[Rattus\_norvegicus]  
znt1\_isoformG\_[Drosophila\_melanogaster]  
znt1\_isoformF\_[Drosophila\_melanogaster]  
znt1-like2\_[Hydra\_vulgaris]

-----  
-----  
-----  
-----  
-----

|                                                |           |            |            |            |            |
|------------------------------------------------|-----------|------------|------------|------------|------------|
| znt4_human                                     | -----     | -----      | -----      | -----      | -----      |
| znt4_[Rattus_norvegicus]                       | -----     | -----      | -----      | -----      | -----      |
| znt4_isoforma_[Mus_musculus]                   | -----     | -----      | -----      | -----      | -----      |
| znt4_isoformb_[Mus_musculus]                   | -----     | -----      | -----      | -----      | -----      |
| znt8_human                                     | -----     | -----      | -----      | -----      | -----      |
| znt8_[Mus_musculus]                            | -----     | -----      | -----      | -----      | -----      |
| znt8_[Rattus_norvegicus]                       | -----     | -----      | -----      | -----      | -----      |
| znt3_human                                     | -----     | -----      | -----      | -----      | -----      |
| znt3_[Rattus_norvegicus]                       | -----     | -----      | -----      | -----      | -----      |
| znt3_isoform1_[Mus_musculus]                   | -----     | -----      | -----      | -----      | -----      |
| znt3_isoform2_[Mus_musculus]                   | -----     | -----      | -----      | -----      | -----      |
| znt2-like_[Hydra_vulgaris]                     | -----     | -----      | -----      | -----      | -----      |
| znt35C_[Drosophila_melanogaster]               | -----     | -----      | -----      | -----      | -----      |
| znt2_[Ciona_intestinalis]                      | ----HOKKS | RDAKTPLF   | AAGSASGYGG | TSEIELDCAE | ----TLATYS |
| znt8_[Danio_rerio]                             | ----QDKES | GERLSRLVEE | ACMLLADYSG | RLAAEIDRR  | QLTRTLAVFL |
| znt2_[Danio_rerio]                             | -----     | -----      | -----      | -----      | -----      |
| znt3_isoformX1_[Danio_rerio]                   | -----     | -----      | -----      | -----      | -----      |
| znt2_human                                     | -----     | -----      | -----      | -----      | -----      |
| znt2_isoform1_[Mus_musculus]                   | -----     | -----      | -----      | -----      | -----      |
| znt2_isoform2_[Mus_musculus]                   | -----     | -----      | -----      | -----      | -----      |
| znt2_isoform1_[Rattus_norvegicus]              | -----     | -----      | -----      | -----      | -----      |
| znt2_isoform2_[Rattus_norvegicus]              | -----     | -----      | -----      | -----      | -----      |
| znt9-like_[Hydra_vulgaris]                     | -----     | -----      | -----      | -----      | -----      |
| znt9_[Drosophila_melanogaster]                 | -----     | -----      | -----      | -----      | N          |
| znt9-like_[Ciona_intestinalis]                 | -----     | -----      | -----      | -----      | R          |
| znt9_[Danio_rerio]                             | -----     | -----      | -----      | -----      | N          |
| znt9_human                                     | -----     | -----      | -----      | -----      | N          |
| znt9_[Rattus_norvegicus]                       | -----     | -----      | -----      | -----      | N          |
| isoform1_znt9_[Mus_musculus]                   | -----     | -----      | -----      | -----      | N          |
| isoform2_znt9_[Mus_musculus]                   | -----     | -----      | -----      | -----      | N          |
| znt9like_[E.Coli_partial]                      | -----     | -----      | -----      | -----      | N          |
| znt9like_[Rhodanobacter_glycinis]              | -----     | -----      | -----      | -----      | -----      |
| znt9like_[Dyella_ginsengisoli]                 | -----     | -----      | -----      | -----      | -----      |
| znt9like2_[Actinobacteria_bacterium]           | -----     | -----      | -----      | -----      | -----      |
| znt9like_[Firmicutes_bacterium]                | -----     | -----      | -----      | -----      | -----      |
| znt9-like3_[Candidatus_Micrarchaeota_archaeon] | -----     | -----      | -----      | -----      | -----      |
| znt9like_[Mesorhizobium_sp._L2C054A000]        | -----     | -----      | -----      | -----      | -----      |
| znt9like_[Geopsychrobacter_electrodiphilus]    | -----     | -----      | -----      | -----      | -----      |
| znt9like_[Sneathiella_limimaris]               | -----     | -----      | -----      | -----      | -----      |
| znt9like_[Sneathiella_sp]                      | -----     | -----      | -----      | -----      | -----      |
| znt9like_[Sneathiella_chungangensis]           | -----     | -----      | -----      | -----      | -----      |
| znt9like_[Leptolyngbya_foveolarum]             | -----     | -----      | -----      | -----      | -----      |
| znt9like_[Massilia_sp._LC238]                  | -----     | -----      | -----      | -----      | -----      |
| znt9like1_[Variovorax_paradoxus]               | -----     | -----      | -----      | -----      | -----      |
| znt9like2_[Variovorax_paradoxus]               | -----     | -----      | -----      | -----      | -----      |
| znt9like_[Nitrosospira_sp._Nsp11]              | -----     | -----      | -----      | -----      | -----      |
| znt9like_[Sorangium_cellulosum]                | -----     | -----      | -----      | -----      | -----      |
| znt9like1_[Actinobacteria_bacterium]           | -----     | -----      | -----      | -----      | -----      |
| znt9like_[Phormidesmis_priestleyi]             | -----     | -----      | -----      | -----      | -----      |
| znt9like1_[Nosdoc_punctiforme]                 | -----     | -----      | -----      | -----      | -----      |
| znt9like2_[Nosdoc_punctiforme]                 | -----     | -----      | -----      | -----      | -----      |
| znt9like_[Nostoc_calcicola]                    | -----     | -----      | -----      | -----      | -----      |
| znt9like_[Nostoc_commune]                      | -----     | -----      | -----      | -----      | -----      |
| znt9like_[Nostoc_piscinale]                    | -----     | -----      | -----      | -----      | -----      |



|                                                                         |            |            |       |          |       |
|-------------------------------------------------------------------------|------------|------------|-------|----------|-------|
| znt9like_[Nostoc_cycadae]                                               | -----      | -----      | ----- | -----    |       |
| znt9like_[Myxosarcina_sp._GI1]                                          | -----      | -----      | ----- | -----    |       |
| znt9like_[Chondrocystis_sp._NIES-4102]                                  | -----      | -----      | ----- | -----    |       |
| znt9like_[Pleurocapsa_sp._PCC_7319]                                     | -----      | -----      | ----- | -----    |       |
| znt33D_[Drosophila_melanogaster]                                        | SKDFTENKGS | GNKHSTVTSN | EK    | LIRSEYYE |       |
| transporter_[Pleurocapsa_sp._PCC_7319]                                  | -----      | -----      | ----- | -----    |       |
| transporter_[Leptolyngbya_foveolarum]                                   | -----      | -----      | ----- | -----    |       |
| transporter_[Myxosarcina_sp._GI1]                                       | -----      | -----      | ----- | -----    |       |
| transporter_[Chondrocystis_sp._NIES-4102]                               | -----      | -----      | ----- | -----    |       |
| transporter_[Phormidesmis_priestleyi]                                   | -----      | -----      | ----- | -----    |       |
| transporter_[Nostoc_piscinale]                                          | -----      | -----      | ----- | -----    |       |
| transporter_[Nosdoc_punctiforme]                                        | -----      | -----      | ----- | -----    |       |
| transporter_[Nostoc_caldicola]                                          | -----      | -----      | ----- | -----    |       |
| cationtransporter3_[Firmicutes_bacterium]                               | -----      | -----      | ----- | -----    |       |
| c.e.p_[Firmicutes_bacterium]                                            | -----      | -----      | ----- | -----    |       |
| cationtransporter1_[Firmicutes_bacterium]                               | -----      | -----      | ----- | -----    |       |
| cationtransporter2_[Firmicutes_bacterium]                               | -----      | -----      | ----- | -----    |       |
| cationtransporter1_[Actinobacteria_bacterium]                           | -----      | -----      | ----- | -----    |       |
| cationtransporter2_[Actinobacteria_bacterium]                           | -----      | -----      | ----- | -----    |       |
| c.e.p_[Candidatus_Woeseearchaeota_archaeon_CG08_land_8_20_14_0_20_43_7] | -----      | -----      | ----- | -----    |       |
| transporter_[E.Coli]                                                    | -----      | -----      | ----- | -----    |       |
| znt9-like2_[Candidatus_Micrarchaeota_archaeon]                          | -----      | -----      | ----- | -----    |       |
| znt9-like_[Candidatus_Pacearchaeota_archaeon]                           | -----      | -----      | ----- | -----    |       |
| znt9-like_[Candidatus_Aenigmarchaeota_archaeon_ex4484_52]               | -----      | -----      | ----- | -----    |       |
| znt9-likel1_[Candidatus_Micrarchaeota_archaeon]                         | -----      | -----      | ----- | -----    |       |
| znt9-like4_[Candidatus_Micrarchaeota_archaeon]                          | -----      | -----      | ----- | -----    |       |
| znt9-like_[Candidatus_Woeseearchaeota_archaeon]                         | -----      | -----      | ----- | -----    |       |
| znt7_[Drosophila_melanogaster]                                          | -----      | -----      | ----- | -----    |       |
| znt7_[Danio_rerio]                                                      | -----      | -----      | ----- | -----    |       |
| znt7_human                                                              | -----      | -----      | ----- | -----    |       |
| znt7_[Mus_musculus]                                                     | -----      | -----      | ----- | -----    |       |
| znt7_[Rattus_norvegicus]                                                | -----      | -----      | ----- | -----    |       |
| znt5-like_[Ciona_intestinalis]                                          | -----      | IVFIAT     | TV    | FV       | VEHYG |
| znt5_[Danio_rerio]                                                      | -----      | FAMIIF     | SV    | MI       | LDFYV |
| znt5_human                                                              | -----      | FATVIF     | FV    | MI       | LDFYV |
| znt5_[Mus_musculus]                                                     | -----      | FTTVIF     | FV    | MI       | LDFYM |
| znt5_[Rattus_norvegicus]                                                | -----      | FTTVIF     | FV    | MI       | LDFYM |
| znt6_[Ciona_intestinalis]                                               | -----      | -----      | ----- | -----    | ----- |
| znt6_[Danio_rerio]                                                      | -----      | -----      | ----- | -----    | ----- |
| znt6_human                                                              | -----      | -----      | ----- | -----    | ----- |
| znt6_[Rattus_norvegicus]                                                | -----      | -----      | ----- | -----    | ----- |
| znt6_isoform1_[Mus_musculus]                                            | -----      | -----      | ----- | -----    | ----- |
| znt6_isoform2_[Mus_musculus]                                            | -----      | -----      | ----- | -----    | ----- |
| znt4_[Danio_rerio]                                                      | -----      | -----      | ----- | -----    | ----- |
| cationtransporter1_[Candidatus_Micrarchaeota_archaeon]                  | -----      | -----      | ----- | -----    | ----- |
| transporter_[Geopsychrobacter_electrodiphilus]                          | -----      | -----      | ----- | -----    | ----- |
| cationtransporter2_[Candidatus_Micrarchaeota_archaeon]                  | -----      | -----      | ----- | -----    | ----- |
| znt10_[Danio_rerio]                                                     | -----      | -----      | ----- | -----    | ----- |
| znt10_human                                                             | -----      | -----      | ----- | -----    | ----- |
| znt10_[Mus_musculus]                                                    | -----      | -----      | ----- | -----    | ----- |
| znt10_[Rattus_norvegicus]                                               | -----      | -----      | ----- | -----    | ----- |
| znt1-likel1_[Hydra_vulgaris]                                            | -----      | -----      | ----- | -----    | ----- |
| znt1_[Ciona_intestinalis]                                               | -----      | -----      | ----- | -----    | ----- |
| znt1a_[Danio_rerio]                                                     | -----      | -----      | ----- | -----    | ----- |
| znt1_human                                                              | -----      | -----      | ----- | -----    | ----- |

znt1\_[Mus\_musculus]  
znt1\_[Rattus\_norvegicus]  
znt1\_isoformG\_[Drosophila\_melanogaster]  
znt1\_isoformF\_[Drosophila\_melanogaster]  
znt1-like2\_[Hydra\_vulgaris]

-----  
-----  
-----  
-----  
-----

|                                                |             |         |            |            |      |            |   |
|------------------------------------------------|-------------|---------|------------|------------|------|------------|---|
| znt4_human                                     |             |         |            | MAG        | SGAW | KRL        |   |
| znt4_[Rattus_norvegicus]                       |             |         |            | MAG        | PGAW | KRL        |   |
| znt4_isoforma_[Mus_musculus]                   |             |         |            | MAG        | PGAW | KRL        |   |
| znt4_isoformb_[Mus_musculus]                   |             |         |            | MAG        | PGAW | KRL        |   |
| znt8_human                                     |             |         |            |            |      |            |   |
| znt8_[Mus_musculus]                            |             |         |            |            |      |            |   |
| znt8_[Rattus_norvegicus]                       |             |         |            |            |      |            |   |
| znt3_human                                     |             |         |            |            |      |            |   |
| znt3_[Rattus_norvegicus]                       |             |         |            |            |      |            |   |
| znt3_isoform1_[Mus_musculus]                   |             |         |            |            |      |            |   |
| znt3_isoform2_[Mus_musculus]                   |             |         |            |            |      |            |   |
| znt2-like_[Hydra_vulgaris]                     |             |         |            |            |      |            |   |
| znt35C_[Drosophila_melanogaster]               |             |         |            |            |      |            |   |
| znt2_[Ciona_intestinalis]                      | NNGTIPVKGIT |         |            | LKAGANA    |      |            | S |
| znt8_[Danio_rerio]                             | QS          | QRDGL   |            | VQNEQKLEEY |      | KRKLARVSQV |   |
| znt2_[Danio_rerio]                             |             |         |            |            |      |            |   |
| znt3_isoformX1_[Danio_rerio]                   |             |         |            |            |      |            |   |
| znt2_human                                     |             |         |            |            |      |            |   |
| znt2_isoform1_[Mus_musculus]                   |             |         |            |            |      |            |   |
| znt2_isoform2_[Mus_musculus]                   |             |         |            |            |      |            |   |
| znt2_isoform1_[Rattus_norvegicus]              |             |         |            |            |      |            |   |
| znt2_isoform2_[Rattus_norvegicus]              |             |         |            |            |      |            |   |
| znt9-like_[Hydra_vulgaris]                     |             |         |            |            |      |            |   |
| znt9_[Drosophila_melanogaster]                 | TSISASRAIS  | DYLLTID | DLAGLRQTKV | R          |      | TAYDSSDLP  |   |
| znt9-like_[Ciona_intestinalis]                 | NFVTPNRAIS  | DFLLTAA | QLESIPKIKR | R          |      | SPYEQE     | P |
| znt9_[Danio_rerio]                             | NTITAVRAMQ  | EYMLPPS | DLEELRQIRV | R          |      | SPYASN     | A |
| znt9_human                                     | NFITAVRAMN  | EFCLKPS | DLEHLRKIRR | R          |      | SPHDDT     | E |
| znt9_[Rattus_norvegicus]                       | NFITGVRAIN  | EFCLKSS | DLEQLRKIRR | R          |      | SPHEDT     | E |
| isoform1_znt9_[Mus_musculus]                   | NFITGVRAIN  | EFCLKSS | DLEQLRKIRR | R          |      | SPHDDT     | E |
| isoform2_znt9_[Mus_musculus]                   | NFITGVRAIN  | EFCLKSS | DLEQLRKIRR | R          |      | SPHDDT     | E |
| znt9like_[E.Coli_partial]                      | NFITGVRAIN  | EFCLKSS | DLEQLRKIRR | R          |      | SPHDDT     | E |
| znt9like_[Rhodanobacter_glycinis]              |             |         |            |            |      |            |   |
| znt9like_[Dyella_ginsengisoli]                 |             |         |            |            |      |            |   |
| znt9like2_[Actinobacteria_bacterium]           |             |         |            |            |      |            |   |
| znt9like_[Firmicutes_bacterium]                |             |         |            |            |      |            |   |
| znt9-like3_[Candidatus_Micrarchaeota_archaeon] |             |         |            |            |      |            |   |
| znt9like_[Mesorhizobium_sp._L2C054A000]        |             |         |            |            |      |            |   |
| znt9like_[Geopsychrobacter_electrodiphilus]    |             |         |            |            |      |            |   |
| znt9like_[Sneathiella_limimaris]               |             |         |            |            |      |            |   |
| znt9like_[Sneathiella_sp]                      |             |         |            |            |      |            |   |
| znt9like_[Sneathiella_chungangensis]           |             |         |            |            |      |            |   |
| znt9like_[Leptolyngbya_foveolarum]             |             |         |            |            |      |            |   |
| znt9like_[Massilia_sp._LC238]                  |             |         |            |            |      |            |   |
| znt9like1_[Variovorax_paradoxus]               |             |         |            |            |      |            |   |
| znt9like2_[Variovorax_paradoxus]               |             |         |            |            |      |            |   |
| znt9like_[Nitrosospira_sp._Nsp11]              |             |         |            |            |      |            |   |
| znt9like_[Sorangium_cellulosum]                |             |         |            |            |      |            |   |
| znt9like1_[Actinobacteria_bacterium]           |             |         |            |            |      |            |   |
| znt9like_[Phormidesmis_priestleyi]             |             |         |            |            |      |            |   |
| znt9like1_[Nosdoc_punctiforme]                 |             |         |            |            |      |            |   |
| znt9like2_[Nosdoc_punctiforme]                 |             |         |            |            |      |            |   |
| znt9like_[Nostoc_calcicola]                    |             |         |            |            |      |            |   |
| znt9like_[Nostoc_commune]                      |             |         |            |            |      |            |   |
| znt9like_[Nostoc_piscinale]                    |             |         |            |            |      |            |   |

|                                                                         |            |            |            |            |            |
|-------------------------------------------------------------------------|------------|------------|------------|------------|------------|
| znt9like_[Nostoc_cycadae]                                               | -----      | -----      | -----      | -----      |            |
| znt9like_[Myxosarcina_sp._GI1]                                          | -----      | -----      | -----      | -----      |            |
| znt9like_[Chondrocystis_sp._NIES-4102]                                  | -----      | -----      | -----      | -----      |            |
| znt9like_[Pleurocapsa_sp._PCC_7319]                                     | -----      | -----      | -----      | -----      |            |
| znt33D_[Drosophila_melanogaster]                                        | NSQTKSDAIK | SLSNNQLSEE | SPEFLNKLRR | IEEASKPKTW | KRPTP-VVLK |
| transporter_[Pleurocapsa_sp._PCC_7319]                                  | -----      | -----      | -----      | -----      |            |
| transporter_[Leptolyngbya_foveolarum]                                   | -----      | -----      | -----      | -----      |            |
| transporter_[Myxosarcina_sp._GI1]                                       | -----      | -----      | -----      | -----      |            |
| transporter_[Chondrocystis_sp._NIES-4102]                               | -----      | -----      | -----      | -----      |            |
| transporter_[Phormidesmis_priestleyi]                                   | -----      | -----      | -----      | -----      |            |
| transporter_[Nostoc_piscinale]                                          | -----      | -----      | -----      | -----      |            |
| transporter_[Nostoc_punctiforme]                                        | -----      | -----      | -----      | -----      |            |
| transporter_[Nostoc_caldicola]                                          | -----      | -----      | -----      | -----      |            |
| cationtransporter3_[Firmicutes_bacterium]                               | -----      | -----      | -----      | -----      |            |
| c.e.p_[Firmicutes_bacterium]                                            | -----      | -----      | -----      | -----      |            |
| cationtransporter1_[Firmicutes_bacterium]                               | -----      | -----      | -----      | -----      |            |
| cationtransporter2_[Firmicutes_bacterium]                               | -----      | -----      | -----      | -----      |            |
| cationtransporter1_[Actinobacteria_bacterium]                           | -----      | -----      | -----      | -----      |            |
| cationtransporter2_[Actinobacteria_bacterium]                           | -----      | -----      | -----      | -----      |            |
| c.e.p_[Candidatus_Woeseearchaeota_archaeon_CG08_land_8_20_14_0_20_43_7] | -----      | -----      | -----      | -----      |            |
| transporter_[E.Coli]                                                    | -----      | -----      | -----      | -----      |            |
| znt9-like2_[Candidatus_Micrarchaeota_archaeon]                          | -----      | -----      | -----      | -----      |            |
| znt9-like_[Candidatus_Pacearchaeota_archaeon]                           | -----      | -----      | -----      | -----      |            |
| znt9-like_[Candidatus_Aenigmarchaeota_archaeon_ex4484_52]               | -----      | -----      | -----      | -----      |            |
| znt9-like1_[Candidatus_Micrarchaeota_archaeon]                          | -----      | -----      | -----      | -----      |            |
| znt9-like4_[Candidatus_Micrarchaeota_archaeon]                          | -----      | -----      | -----      | -----      |            |
| znt9-like_[Candidatus_Woeseearchaeota_archaeon]                         | -----      | -----      | -----      | -----      |            |
| znt7_[Drosophila_melanogaster]                                          | -----      | -----      | -----      | -----      |            |
| znt7_[Danio_rerio]                                                      | -----      | -----      | -----      | -----      |            |
| znt7_human                                                              | -----      | -----      | -----      | -----      |            |
| znt7_[Mus_musculus]                                                     | -----      | -----      | -----      | -----      |            |
| znt7_[Rattus_norvegicus]                                                | -----      | -----      | -----      | -----      |            |
| znt5-like_[Ciona_intestinalis]                                          | HFFVSNR    | LSPMQV     | SRLGYFAIA  |            |            |
| znt5_[Danio_rerio]                                                      | ESICMAK    | LETSRC     | ARYGAIFLF  |            |            |
| znt5_human                                                              | DSICSVK    | MEVSKC     | ARYGSFPIF  |            |            |
| znt5_[Mus_musculus]                                                     | DSVCSVK    | MDVSKC     | ARYGSFPIF  |            |            |
| znt5_[Rattus_norvegicus]                                                | DSVCSVK    | MEASKC     | ARYGSFPIF  |            |            |
| znt6_[Ciona_intestinalis]                                               | -----      | -----      | -----      | -----      |            |
| znt6_[Danio_rerio]                                                      | -----      | -----      | -----      | -----      |            |
| znt6_human                                                              | -----      | -----      | -----      | -----      |            |
| znt6_[Rattus_norvegicus]                                                | -----      | -----      | -----      | -----      |            |
| znt6_isoform1_[Mus_musculus]                                            | -----      | -----      | -----      | -----      |            |
| znt6_isoform2_[Mus_musculus]                                            | -----      | -----      | -----      | -----      |            |
| znt4_[Danio_rerio]                                                      | -----      | -----      | -----      | -----      |            |
| cationtransporter1_[Candidatus_Micrarchaeota_archaeon]                  | -----      | -----      | -----      | -----      |            |
| transporter_[Geopsychrobacter_electrodiphilus]                          | -----      | -----      | -----      | -----      |            |
| cationtransporter2_[Candidatus_Micrarchaeota_archaeon]                  | -----      | -----      | -----      | -----      |            |
| znt10_[Danio_rerio]                                                     | -----      | -----      | -----      | -----      |            |
| znt10_human                                                             | -----      | -----      | -----      | -----      |            |
| znt10_[Mus_musculus]                                                    | -----      | -----      | -----      | -----      |            |
| znt10_[Rattus_norvegicus]                                               | -----      | -----      | -----      | -----      |            |
| znt1-likel_[Hydra_vulgaris]                                             | -----      | -----      | -----      | -----      |            |
| znt1_[Ciona_intestinalis]                                               | -----      | -----      | -----      | -----      |            |
| znt1a_[Danio_rerio]                                                     | -----      | -----      | -----      | -----      |            |
| znt1_human                                                              | -----      | -----      | -----      | -----      |            |

znt1\_[Mus\_musculus]  
znt1\_[Rattus\_norvegicus]  
znt1\_isoformG\_[Drosophila\_melanogaster]  
znt1\_isoformF\_[Drosophila\_melanogaster]  
znt1-like2\_[Hydra\_vulgaris]

-----  
-----  
-----  
-----  
-----

|                                                |       |  |   |           |
|------------------------------------------------|-------|--|---|-----------|
| znt4_human                                     |       |  |   |           |
| znt4_[Rattus_norvegicus]                       |       |  |   |           |
| znt4_isoforma_[Mus_musculus]                   |       |  |   |           |
| znt4_isoformb_[Mus_musculus]                   |       |  |   |           |
| znt8_human                                     |       |  |   |           |
| znt8_[Mus_musculus]                            |       |  |   |           |
| znt8_[Rattus_norvegicus]                       |       |  |   |           |
| znt3_human                                     |       |  |   |           |
| znt3_[Rattus_norvegicus]                       |       |  |   |           |
| znt3_isoform1_[Mus_musculus]                   |       |  |   |           |
| znt3_isoform2_[Mus_musculus]                   |       |  |   |           |
| znt2-like_[Hydra_vulgaris]                     | M     |  |   |           |
| znt35C_[Drosophila_melanogaster]               |       |  |   |           |
| znt2_[Ciona_intestinalis]                      | AEASY |  |   |           |
| znt8_[Danio_rerio]                             | RKELR |  |   |           |
| znt2_[Danio_rerio]                             |       |  |   |           |
| znt3_isoformX1_[Danio_rerio]                   |       |  |   |           |
| znt2_human                                     |       |  |   |           |
| znt2_isoform1_[Mus_musculus]                   |       |  |   |           |
| znt2_isoform2_[Mus_musculus]                   |       |  |   |           |
| znt2_isoform1_[Rattus_norvegicus]              |       |  |   |           |
| znt2_isoform2_[Rattus_norvegicus]              |       |  |   |           |
| znt9-like_[Hydra_vulgaris]                     |       |  |   |           |
| znt9_[Drosophila_melanogaster]                 | ADQCY |  | L | KLDVEKRAL |
| znt9-like_[Ciona_intestinalis]                 | PMTVY |  | W | RRDVEAKAV |
| znt9_[Danio_rerio]                             | PIHVV |  | L | ERDVEKKAI |
| znt9_human                                     | AFTVF |  | L | RSDVEAKAL |
| znt9_[Rattus_norvegicus]                       | SFTVF |  | L | RSDVEAKSL |
| isoform1_znt9_[Mus_musculus]                   | SFTVF |  | L | RSDVEAKAL |
| isoform2_znt9_[Mus_musculus]                   | SFTVF |  | L | RSDVEAKAL |
| znt9like_[E.Coli_partial]                      | SFTVF |  | L | RSDVEAKAL |
| znt9like_[Rhodanobacter_glycinis]              |       |  |   |           |
| znt9like_[Dyella_ginsengisoli]                 |       |  |   |           |
| znt9like2_[Actinobacteria_bacterium]           |       |  |   |           |
| znt9like_[Firmicutes_bacterium]                |       |  |   |           |
| znt9-like3_[Candidatus_Micrarchaeota_archaeon] |       |  |   |           |
| znt9like_[Mesorhizobium_sp._L2C054A000]        |       |  |   |           |
| znt9like_[Geopsychrobacter_electrodiphilus]    |       |  |   |           |
| znt9like_[Sneathiella_limimaris]               |       |  |   |           |
| znt9like_[Sneathiella_sp]                      |       |  |   |           |
| znt9like_[Sneathiella_chungangensis]           |       |  |   |           |
| znt9like_[Leptolyngbya_foveolarum]             |       |  |   |           |
| znt9like_[Massilia_sp._LC238]                  |       |  |   |           |
| znt9like1_[Variovorax_paradoxus]               |       |  |   |           |
| znt9like2_[Variovorax_paradoxus]               |       |  |   |           |
| znt9like_[Nitrosospira_sp._Nsp11]              |       |  |   |           |
| znt9like_[Sorangium_cellulosum]                |       |  |   |           |
| znt9like1_[Actinobacteria_bacterium]           |       |  |   |           |
| znt9like_[Phormidesmis_priestleyi]             |       |  |   |           |
| znt9like1_[Nosdoc_punctiforme]                 |       |  |   |           |
| znt9like2_[Nosdoc_punctiforme]                 |       |  |   |           |
| znt9like_[Nostoc_calcicola]                    |       |  |   |           |
| znt9like_[Nostoc_commune]                      |       |  |   |           |
| znt9like_[Nostoc_piscinale]                    |       |  |   |           |

|                                                                         |             |       |       |       |       |       |
|-------------------------------------------------------------------------|-------------|-------|-------|-------|-------|-------|
| znt9like_[Nostoc_cycadae]                                               | -----       | ----- | ----- | ----- |       |       |
| znt9like_[Myxosarcina_sp._GI1]                                          | -----       | ----- | ----- | ----- |       |       |
| znt9like_[Chondrocystis_sp._NIES-4102]                                  | -----       | ----- | ----- | ----- |       |       |
| znt9like_[Pleurocapsa_sp._PCC_7319]                                     | -----       | ----- | ----- | ----- |       |       |
| znt33D_[Drosophila_melanogaster]                                        | SNQNYSAANKN | SEN   | ----- | ALD   | AKPQ  | T     |
| transporter_[Pleurocapsa_sp._PCC_7319]                                  | -----       | ----- | ----- | ----- | ----- | ----- |
| transporter_[Leptolyngbya_foveolarum]                                   | -----       | ----- | ----- | ----- | ----- | ----- |
| transporter_[Myxosarcina_sp._GI1]                                       | -----       | ----- | ----- | ----- | ----- | ----- |
| transporter_[Chondrocystis_sp._NIES-4102]                               | -----       | ----- | ----- | ----- | ----- | ----- |
| transporter_[Phormidesmis_priestleyi]                                   | -----       | ----- | ----- | ----- | ----- | ----- |
| transporter_[Nostoc_piscinale]                                          | -----       | ----- | ----- | ----- | ----- | ----- |
| transporter_[Nosdoc_punctiforme]                                        | -----       | ----- | ----- | ----- | ----- | ----- |
| transporter_[Nostoc_caldicola]                                          | -----       | ----- | ----- | ----- | ----- | ----- |
| cationtransporter3_[Firmicutes_bacterium]                               | -----       | ----- | ----- | ----- | ----- | ----- |
| c.e.p_[Firmicutes_bacterium]                                            | -----       | ----- | ----- | ----- | ----- | ----- |
| cationtransporter1_[Firmicutes_bacterium]                               | -----       | ----- | ----- | ----- | ----- | ----- |
| cationtransporter2_[Firmicutes_bacterium]                               | -----       | ----- | ----- | ----- | ----- | ----- |
| cationtransporter1_[Actinobacteria_bacterium]                           | -----       | ----- | ----- | ----- | ----- | ----- |
| cationtransporter2_[Actinobacteria_bacterium]                           | -----       | ----- | ----- | ----- | ----- | ----- |
| c.e.p_[Candidatus_Woeseearchaeota_archaeon_CG08_land_8_20_14_0_20_43_7] | -----       | ----- | ----- | ----- | ----- | ----- |
| transporter_[E.Coli]                                                    | -----       | ----- | ----- | ----- | ----- | ----- |
| znt9-like2_[Candidatus_Micrarchaeota_archaeon]                          | -----       | ----- | ----- | ----- | ----- | ----- |
| znt9-like_[Candidatus_Pacearchaeota_archaeon]                           | -----       | ----- | ----- | ----- | ----- | ----- |
| znt9-like_[Candidatus_Aenigmarchaeota_archaeon_ex4484_52]               | -----       | ----- | ----- | ----- | ----- | ----- |
| znt9-likel1_[Candidatus_Micrarchaeota_archaeon]                         | -----       | ----- | ----- | ----- | ----- | ----- |
| znt9-like4_[Candidatus_Micrarchaeota_archaeon]                          | -----       | ----- | ----- | ----- | ----- | ----- |
| znt9-like_[Candidatus_Woeseearchaeota_archaeon]                         | -----       | ----- | ----- | ----- | ----- | ----- |
| znt7_[Drosophila_melanogaster]                                          | -----       | ----- | ----- | ----- | ----- | ----- |
| znt7_[Danio_rerio]                                                      | -----       | ----- | ----- | ----- | ----- | ----- |
| znt7_human                                                              | -----       | ----- | ----- | ----- | ----- | ----- |
| znt7_[Mus_musculus]                                                     | -----       | ----- | ----- | ----- | ----- | ----- |
| znt7_[Rattus_norvegicus]                                                | -----       | ----- | ----- | ----- | ----- | ----- |
| znt5-like_[Ciona_intestinalis]                                          | GTAMF       | ----- | ----- | ----- | LG    | F     |
| znt5_[Danio_rerio]                                                      | LNGLL       | ----- | ----- | ----- | LA    | N     |
| znt5_human                                                              | ISALL       | ----- | ----- | ----- | FG    | N     |
| znt5_[Mus_musculus]                                                     | ISALL       | ----- | ----- | ----- | FG    | N     |
| znt5_[Rattus_norvegicus]                                                | ISALL       | ----- | ----- | ----- | FG    | N     |
| znt6_[Ciona_intestinalis]                                               | -----       | ----- | ----- | ----- | ----- | ----- |
| znt6_[Danio_rerio]                                                      | -----       | ----- | ----- | ----- | ----- | ----- |
| znt6_human                                                              | -----       | ----- | ----- | ----- | ----- | ----- |
| znt6_[Rattus_norvegicus]                                                | -----       | ----- | ----- | ----- | ----- | ----- |
| znt6_isoform1_[Mus_musculus]                                            | -----       | ----- | ----- | ----- | ----- | ----- |
| znt6_isoform2_[Mus_musculus]                                            | -----       | ----- | ----- | ----- | ----- | ----- |
| znt4_[Danio_rerio]                                                      | -----       | ----- | ----- | ----- | ----- | ----- |
| cationtransporter1_[Candidatus_Micrarchaeota_archaeon]                  | -----       | ----- | ----- | ----- | ----- | ----- |
| transporter_[Geopsychrobacter_electrodiphilus]                          | -----       | ----- | ----- | ----- | ----- | ----- |
| cationtransporter2_[Candidatus_Micrarchaeota_archaeon]                  | -----       | ----- | ----- | ----- | ----- | ----- |
| znt10_[Danio_rerio]                                                     | -----       | ----- | ----- | ----- | ----- | ----- |
| znt10_human                                                             | -----       | ----- | ----- | ----- | ----- | ----- |
| znt10_[Mus_musculus]                                                    | -----       | ----- | ----- | ----- | ----- | ----- |
| znt10_[Rattus_norvegicus]                                               | -----       | ----- | ----- | ----- | ----- | ----- |
| znt1-likel1_[Hydra_vulgaris]                                            | -----       | ----- | ----- | ----- | ----- | ----- |
| znt1_[Ciona_intestinalis]                                               | -----       | ----- | ----- | ----- | ----- | ----- |
| znt1a_[Danio_rerio]                                                     | -----       | ----- | ----- | ----- | ----- | ----- |
| znt1_human                                                              | -----       | ----- | ----- | ----- | ----- | ----- |

znt1\_[Mus\_musculus]  
znt1\_[Rattus\_norvegicus]  
znt1\_isoformG\_[Drosophila\_melanogaster]  
znt1\_isoformF\_[Drosophila\_melanogaster]  
znt1-like2\_[Hydra\_vulgaris]

-----  
-----  
-----  
-----  
-----







znt1\_[Mus\_musculus]  
znt1\_[Rattus\_norvegicus]  
znt1\_isoformG\_[Drosophila\_melanogaster]  
znt1\_isoformF\_[Drosophila\_melanogaster]  
znt1-like2\_[Hydra\_vulgaris]

-----  
-----  
-----  
-----  
-----



|                                                                         |            |            |           |           |
|-------------------------------------------------------------------------|------------|------------|-----------|-----------|
| znt9like_[Nostoc_cycadae]                                               | -----      | -----      | -----     | -----     |
| znt9like_[Myxosarcina_sp._GI1]                                          | -----      | -----      | -----     | -----     |
| znt9like_[Chondrocystis_sp._NIES-4102]                                  | -----      | -----      | -----     | -----     |
| znt9like_[Pleurocapsa_sp._PCC_7319]                                     | -----      | -----      | -----     | -----     |
| znt33D_[Drosophila_melanogaster]                                        | FQPGAPEIPI | VENSAVDSDR | KAVEIMPEN | V         |
| transporter_[Pleurocapsa_sp._PCC_7319]                                  | -----      | -----      | -----     | -----     |
| transporter_[Leptolyngbya_foveolarum]                                   | -----      | -----      | -----     | -----     |
| transporter_[Myxosarcina_sp._GI1]                                       | -----      | -----      | -----     | -----     |
| transporter_[Chondrocystis_sp._NIES-4102]                               | -----      | -----      | -----     | -----     |
| transporter_[Phormidesmis_priestleyi]                                   | -----      | -----      | -----     | -----     |
| transporter_[Nostoc_piscinale]                                          | -----      | -----      | -----     | -----     |
| transporter_[Nosdoc_punctiforme]                                        | -----      | -----      | -----     | -----     |
| transporter_[Nostoc_caldicola]                                          | -----      | -----      | -----     | -----     |
| cationtransporter3_[Firmicutes_bacterium]                               | -----      | -----      | -----     | -----     |
| c.e.p_[Firmicutes_bacterium]                                            | -----      | -----      | -----     | -----     |
| cationtransporter1_[Firmicutes_bacterium]                               | -----      | -----      | -----     | -----     |
| cationtransporter2_[Firmicutes_bacterium]                               | -----      | -----      | -----     | -----     |
| cationtransporter1_[Actinobacteria_bacterium]                           | -----      | -----      | -----     | -----     |
| cationtransporter2_[Actinobacteria_bacterium]                           | -----      | -----      | -----     | -----     |
| c.e.p_[Candidatus_Woeseearchaeota_archaeon_CG08_land_8_20_14_0_20_43_7] | -----      | -----      | -----     | -----     |
| transporter_[E.Coli]                                                    | -----      | -----      | -----     | -----     |
| znt9-like2_[Candidatus_Micrarchaeota_archaeon]                          | -----      | -----      | -----     | -----     |
| znt9-like_[Candidatus_Pacearchaeota_archaeon]                           | -----      | -----      | -----     | -----     |
| znt9-like_[Candidatus_Aenigmarchaeota_archaeon_ex4484_52]               | -----      | -----      | -----     | -----     |
| znt9-like1_[Candidatus_Micrarchaeota_archaeon]                          | -----      | -----      | -----     | -----     |
| znt9-like4_[Candidatus_Micrarchaeota_archaeon]                          | -----      | -----      | -----     | -----     |
| znt9-like_[Candidatus_Woeseearchaeota_archaeon]                         | -----      | -----      | -----     | -----     |
| znt7_[Drosophila_melanogaster]                                          | -----      | -----      | -----     | -----     |
| znt7_[Danio_rerio]                                                      | -----      | -----      | -----     | -----     |
| znt7_human                                                              | -----      | -----      | -----     | -----     |
| znt7_[Mus_musculus]                                                     | -----      | -----      | -----     | -----     |
| znt7_[Rattus_norvegicus]                                                | -----      | -----      | -----     | -----     |
| znt5-like_[Ciona_intestinalis]                                          | ISGGVIV    | S          | MVFFILASD | I LSWPQPK |
| znt5_[Danio_rerio]                                                      | LSGGVLV    | S          | ACFFIMADS | I LSAPSSK |
| znt5_human                                                              | LSGGVVV    | S          | AIFFILSAN | I LSSPSKR |
| znt5_[Mus_musculus]                                                     | LSGGVVV    | S          | AVFFILSAN | I LSSPSKR |
| znt5_[Rattus_norvegicus]                                                | LSGGVVV    | S          | AVFFILSAN | I LSSPSKR |
| znt6_[Ciona_intestinalis]                                               | -----      | -----      | FDFD      | LS        |
| znt6_[Danio_rerio]                                                      | -----      | -----      | SDAP      | VY        |
| znt6_human                                                              | -----      | -----      | -----     | -----     |
| znt6_[Rattus_norvegicus]                                                | -----      | -----      | -----     | -----     |
| znt6_isoform1_[Mus_musculus]                                            | -----      | -----      | -----     | -----     |
| znt6_isoform2_[Mus_musculus]                                            | -----      | -----      | -----     | -----     |
| znt4_[Danio_rerio]                                                      | -----      | -----      | FDSE      | LQEEESPRF |
| cationtransporter1_[Candidatus_Micrarchaeota_archaeon]                  | -----      | -----      | -----     | -----     |
| transporter_[Geopsychrobacter_electrodiphilus]                          | -----      | -----      | -----     | -----     |
| cationtransporter2_[Candidatus_Micrarchaeota_archaeon]                  | -----      | -----      | -----     | -----     |
| znt10_[Danio_rerio]                                                     | -----      | -----      | -----     | -----     |
| znt10_human                                                             | -----      | -----      | -----     | -----     |
| znt10_[Mus_musculus]                                                    | -----      | -----      | -----     | -----     |
| znt10_[Rattus_norvegicus]                                               | -----      | -----      | -----     | -----     |
| znt1-likel_[Hydra_vulgaris]                                             | -----      | -----      | -----     | -----     |
| znt1_[Ciona_intestinalis]                                               | -----      | -----      | -----     | -----     |
| znt1a_[Danio_rerio]                                                     | -----      | -----      | -----     | -----     |
| znt1_human                                                              | -----      | -----      | -----     | -----     |

znt1\_[Mus\_musculus]  
znt1\_[Rattus\_norvegicus]  
znt1\_isoformG\_[Drosophila\_melanogaster]  
znt1\_isoformF\_[Drosophila\_melanogaster]  
znt1-like2\_[Hydra\_vulgaris]

-----  
-----  
-----  
-----  
-----







znt1\_[Mus\_musculus]  
znt1\_[Rattus\_norvegicus]  
znt1\_isoformG\_[Drosophila\_melanogaster]  
znt1\_isoformF\_[Drosophila\_melanogaster]  
znt1-like2\_[Hydra\_vulgaris]

-----  
-----  
-----  
-----  
-----



|                                                                         |            |       |            |            |             |            |
|-------------------------------------------------------------------------|------------|-------|------------|------------|-------------|------------|
| znt9like_[Nostoc_cycadae]                                               | -----      | MA    | -----      | SDSSK      | KTIFAAMGAN  | LAIATIKFIA |
| znt9like_[Myxosarcina_sp._GI1]                                          | -----      | MS    | -----      | STSAK      | KTIYAAITAN  | FGIAIIKFIA |
| znt9like_[Chondrocystis_sp._NIES-4102]                                  | -----      | M     | -----      | SGSTK      | ETIYAAMAAN  | FAIAITKFVA |
| znt9like_[Pleurocapsa_sp._PCC_7319]                                     | -----      | M     | -----      | SGSAK      | KTIYAAMAAN  | FAIAIIFKFA |
| znt33D_[Drosophila_melanogaster]                                        | TA         | KWD   | GHCHFKE    | RETGVDKAAR | RVLIIACILC  | TIFLILEVIG |
| transporter_[Pleurocapsa_sp._PCC_7319]                                  | -----      | MSD   | FQVQFDE    | RLAQRNSIQ  | NVLYITLGLN  | LLVLETKFSL |
| transporter_[Leptolyngbya_foveolarum]                                   | -----      | ----- | -----      | -----      | MR          | IVVVVLKAGV |
| transporter_[Myxosarcina_sp._GI1]                                       | -----      | ----- | -----      | MQDNRSQVR  | KVLWITLLL   | LFVMALKATI |
| transporter_[Chondrocystis_sp._NIES-4102]                               | -----      | ----- | -----      | MQDNRSQVR  | RVLWLTLLL   | LFVMGLKFSL |
| transporter_[Phormidesmis_priestleyi]                                   | -----      | M     | -----      | IVDNRSTVR  | RVLIIITLLL  | LFVLGLKAFV |
| transporter_[Nostoc_piscinale]                                          | -----      | M     | -----      | TYDNRGTVR  | KVLIITLLL   | LLVMGLKAVV |
| transporter_[Nosdoc_punctiforme]                                        | -----      | M     | -----      | LYDNRAEVR  | KVLIITLLL   | LFVMGLKALV |
| transporter_[Nostoc_callicola]                                          | -----      | M     | -----      | ISDNRAEVR  | KVLIITLVLN  | LFVMGLKVLV |
| cationtransporter3_[Firmicutes_bacterium]                               | -----      | ----- | -----      | MEKRFRRIR  | TVLWIILFAN  | FLSALVKIVV |
| c.e.p_[Firmicutes_bacterium]                                            | -----      | ----- | -----      | MQVR       | RVLWIILFAN  | LGVALLKIVV |
| cationtransporter1_[Firmicutes_bacterium]                               | -----      | ----- | -----      | MKKNYRKVK  | QVLWITLFIN  | LLVAALKIIV |
| cationtransporter2_[Firmicutes_bacterium]                               | -----      | ----- | -----      | MTENYNKVK  | KILWIVLFVN  | LAVAANKILV |
| cationtransporter1_[Actinobacteria_bacterium]                           | -----      | MGY   | KROQVG     | POGSRADVR  | RVLWIILGLN  | LLVAFAKLGY |
| cationtransporter2_[Actinobacteria_bacterium]                           | -----      | MGY   | TKASEYS    | AGASRARRR  | RVLWITLVLN  | LVALAKLTY  |
| c.e.p_[Candidatus_Woeseearchaeota_archaeon_CG08_land_8_20_14_0_20_43_7] | -----      | ----- | MSTLTK     | VLNKREAETT | RITVGLLLIN  | IALVIAKLS  |
| transporter_[E.Coli]                                                    | -----      | MQVN  | KFTDDIDI   | SSHERFIAAR | KSTWVSVLVN  | CFLTSGQVIT |
| znt9-like2_[Candidatus_Micrarchaeota_archaeon]                          | -----      | ----- | -----      | MKEEKE     | RIALISVLVN  | ILLALGKLAI |
| znt9-like_[Candidatus_Pacearchaeota_archaeon]                           | -----      | ----- | -----      | MKE        | KIALISVLN   | LILAVGKVL  |
| znt9-like_[Candidatus_Aenigmarchaeota_archaeon_ex4484_52]               | -----      | ----- | -----      | MKE        | KIALISFVN   | LLAVAGKILI |
| znt9-likel_[Candidatus_Micrarchaeota_archaeon]                          | -----      | ----- | -----      | MDKL       | RAASFSILVN  | LVLASAKLAV |
| znt9-like4_[Candidatus_Micrarchaeota_archaeon]                          | -----      | ----- | -----      | MGKKL      | GAASMSIAVN  | TALLISKIAA |
| znt9-like_[Candidatus_Woeseearchaeota_archaeon]                         | -----      | ----- | -----      | MSTKL      | GAAALSLFVN  | IALTASKLVL |
| znt7_[Drosophila_melanogaster]                                          | RE         | KLNS  | WKR LIF    | SDRNS      | RNLFLFLLL   | LSFAFVELFY |
| znt7_[Danio_rerio]                                                      | VV         | KLSG  | WFR SIL    | ADKTS      | RNLFFFCLN   | LSFAFVELLY |
| znt7_human                                                              | FG         | KISG  | WFR SIL    | SDKTS      | RNLFFFCLN   | LSFAFVELLY |
| znt7_[Mus_musculus]                                                     | FG         | KISG  | WFR SIL    | SDKTS      | RNLFFFCLN   | LSFAFVELLY |
| znt7_[Rattus_norvegicus]                                                | FG         | KISG  | WFR SIL    | SDKTS      | RNLFFFCLN   | LSFAFVELLY |
| znt5-like_[Ciona_intestinalis]                                          | GT         | LVNG  | FLR RVL    | EKDS       | RHIFYFLCIN  | LSFAFVELAW |
| znt5_[Danio_rerio]                                                      | PR         | FIKD  | SLK QIL    | EEYDS      | RQIFYFLCIN  | LAFTFVELFY |
| znt5_human                                                              | PR         | FIKE  | SLK QIL    | EESDS      | RQIFYFLCIN  | LLFTFVELFY |
| znt5_[Mus_musculus]                                                     | PR         | FIKD  | SLK QVL    | EESDS      | RQIFYFLCIN  | LLFTFVELFY |
| znt5_[Rattus_norvegicus]                                                | PR         | FIKD  | SLK QIL    | EESDS      | RQIFYFLCIN  | LLFTFVELFY |
| znt6_[Ciona_intestinalis]                                               | YG         | QLKH  | TVQ PLLSL  | RSA        | RRTLAFIIFN  | LLIIFILLSW |
| znt6_[Danio_rerio]                                                      | LG         | KLAQ  | EFR LVTSD  | RRS        | WKILLFGVLN  | VVCTGCLLMW |
| znt6_human                                                              | FG         | KLLR  | EFR LVAAD  | RRS        | WKILLFGVIN  | LICTGFLLMW |
| znt6_[Rattus_norvegicus]                                                | FG         | KLLQ  | EFR LVAAD  | RRS        | WKILLFGAIN  | VLCTGFLLMW |
| znt6_isoform1_[Mus_musculus]                                            | FG         | KLLQ  | EFR LVAAD  | RRS        | WKILLFGAIN  | VLCTGFLLMW |
| znt6_isoform2_[Mus_musculus]                                            | FG         | KLLQ  | EFR LVAAD  | RRS        | WKILLFGAIN  | VLCTGFLLMW |
| znt4_[Danio_rerio]                                                      | LGASTGSTGP | EAC   | DGCORN     | REQORRRVM  | RKLGGAALVLY | FLFMVLELIG |
| cationtransporter1_[Candidatus_Micrarchaeota_archaeon]                  | -----      | ----- | MDGE       | I          | KQLRIAFVLT  | FLVLVIQLAG |
| transporter_[Geopsychrobacter_electrodiphilus]                          | -----      | MSGH  | HHH DQDENI | S          | ARLLATMLLN  | FAITVIEIIG |
| cationtransporter2_[Candidatus_Micrarchaeota_archaeon]                  | -----      | ----- | MHKHNL     | N          | KRIGLVLLFN  | ILITLAEYVG |
| znt10_[Danio_rerio]                                                     | -----      | ----- | MGRYSG     | K          | CRLILMLVIT  | VIFFVAEIVA |
| znt10_human                                                             | -----      | ----- | MGRYSG     | K          | CRLLFMLVLT  | VAFFVAELVS |
| znt10_[Mus_musculus]                                                    | -----      | ----- | MGRYSG     | K          | CRLLFMLVLT  | AAFFVAELVS |
| znt10_[Rattus_norvegicus]                                               | -----      | ----- | MGRYSG     | K          | CRLLFMLVLT  | AAFFVAELVS |
| znt1-likel_[Hydra_vulgaris]                                             | -----      | YDK   | KKFTNR     | W          | LKFIAMILCT  | AFLFILKIVV |
| znt1_[Ciona_intestinalis]                                               | -----      | QENH  | GFC GKIVRT | K          | SRLSSMLGLI  | VVYFLAEVVV |
| znt1a_[Danio_rerio]                                                     | -----      | ----- | MAC AP     | N          | VRLLCMLSLT  | FGFFIVEVVV |
| znt1_human                                                              | -----      | ----- | MGCWGR     | N          | GRLLCMLALT  | FMFVLEVVV  |

znt1\_[Mus\_musculus]  
znt1\_[Rattus\_norvegicus]  
znt1\_isoformG\_[Drosophila\_melanogaster]  
znt1\_isoformF\_[Drosophila\_melanogaster]  
znt1-like2\_[Hydra\_vulgaris]

```
-----  ---MGCWGR  N-----R  GRLLCMLLLT  FMFMVLEVVV  
-----  ---MGCWGR  N-----R  GRLLCMLLLT  FMFMVLEVVV  
-----  ---MAKYSG  K-----K  CRLLSMMWLT  AFFFFVEIIV  
-----  ---MAKYSG  K-----K  CRLLSMMWLT  AFFFFVEIIV  
-----  M  GKM  RCCQLS  Q-----K  VSFVSMMLT  TTFFIVEIVV
```

|                                                |            |            |       |       |       |            |       |       |       |
|------------------------------------------------|------------|------------|-------|-------|-------|------------|-------|-------|-------|
| znt4_human                                     | GYIANSLAIM | TDALHMLTDL | S     | ----  | AAIL  | TLLALWLSS  | ---   | KSP   | ---   |
| znt4_[Rattus_norvegicus]                       | GYMANSLAIM | TDALHMLTDL | S     | ----  | AAIL  | TLLALWLSS  | ---   | KSP   | ---   |
| znt4_isoforma_[Mus_musculus]                   | GYMANSLAIM | TDALHMLTDL | S     | ----  | AAIL  | TLLALWLSS  | ---   | KSP   | ---   |
| znt4_isoformb_[Mus_musculus]                   | -----      | -----      | ----- | ----- | ----- | -----      | ----- | ----- | ----- |
| znt8_human                                     | GHIAGSLAVV | TDAAHLLIDL | T     | ----  | SFLL  | SLFSLWLSS  | ---   | KPP   | ---   |
| znt8_[Mus_musculus]                            | GHVAGSLAIL | TDAAHLLIDL | T     | ----  | SFLL  | SLFSLWLSS  | ---   | RPP   | ---   |
| znt8_[Rattus_norvegicus]                       | GHVAGSLAVL | TDAAHLLIDL | T     | ----  | SFLL  | SLFSLWLSS  | ---   | RPP   | ---   |
| znt3_human                                     | GYLAHSLAIM | TDAAHLLADV | G     | ----  | SMMG  | SLFSLWLST  | ---   | RPA   | ---   |
| znt3_[Rattus_norvegicus]                       | GYLAHSLAIM | TDAAHLLADI | G     | ----  | SMMA  | SLFSLWLST  | ---   | RPA   | ---   |
| znt3_isoform1_[Mus_musculus]                   | GYLAHSLAIM | TDAAHLLADI | G     | ----  | SMLA  | SLFSLWLST  | ---   | RPA   | ---   |
| znt3_isoform2_[Mus_musculus]                   | GYLAHSLAIM | TDAAHLLADI | G     | ----  | SMLA  | SLFSLWLST  | ---   | RPA   | ---   |
| znt2-like_[Hydra_vulgaris]                     | GYFSNSLAIM | TDAAHLLSDF | G     | ----  | SFMI  | SLFALWLTG  | ---   | KKP   | ---   |
| znt35C_[Drosophila_melanogaster]               | GVLSNSLAIA | TDAAHLLTDF | A     | ----  | SFMI  | SLFAIWIAG  | ---   | RPS   | ---   |
| znt2_[Ciona_intestinalis]                      | GFLANSLAIM | TDASHLLTDV | S     | ----  | SFLI  | SIIALKMAA  | ---   | RPI   | ---   |
| znt8_[Danio_rerio]                             | GYFAGSLAVM | TDAAHLLVDL | T     | ----  | SFII  | SLCSLWLSS  | ---   | RPA   | ---   |
| znt2_[Danio_rerio]                             | GYLAHSLAIM | TDAAHLLTDF | G     | ----  | SMMV  | SLFSLWISS  | ---   | RPP   | ---   |
| znt3_isoformX1_[Danio_rerio]                   | GYLAHSLAIM | TDAAHLLTDF | G     | ----  | SMMV  | SLFSLWISS  | ---   | RPP   | ---   |
| znt2_human                                     | -----      | -----      | ----- | ----- | ----- | -----      | ----- | ----- | ----- |
| znt2_isoform1_[Mus_musculus]                   | GYLAQSLAIM | TDAAHLLTDF | A     | ----  | SMLI  | SLFALWVSS  | ---   | RPA   | ---   |
| znt2_isoform2_[Mus_musculus]                   | GYLAQSLAIM | TDAAHLLTDF | A     | ----  | SMLI  | SLFALWVSS  | ---   | RPA   | ---   |
| znt2_isoform1_[Rattus_norvegicus]              | GYLAQSLAIM | TDAAHLLTDF | A     | ----  | SMLI  | SLFSLWVSS  | ---   | RPA   | ---   |
| znt2_isoform2_[Rattus_norvegicus]              | GYLAQSLAIM | TDAAHLLTDF | A     | ----  | SMLI  | SLFSLWVSS  | ---   | RPA   | ---   |
| znt9-like_[Hydra_vulgaris]                     | YIYTGASML  | SEAIHSLADA | A     | ----  | NQML  | LYIGIWHSI  | ---   | KK    | P     |
| znt9_[Drosophila_melanogaster]                 | WLYSGSHSMF | AEVIHSLADL | I     | ----  | NQLI  | LAFGIYKSS  | ---   | QS    | P     |
| znt9-like_[Ciona_intestinalis]                 | FLSTGASMF  | SETLHSLADT | C     | ----  | NQLL  | LLWGINESL  | ---   | KK    | A     |
| znt9_[Danio_rerio]                             | WVYTGASMF  | SEAIHSLADT | C     | ----  | NQAL  | LALGISQSV  | ---   | RN    | P     |
| znt9_human                                     | WIYTGASMF  | SEAIHSLSDT | C     | ----  | NQGL  | LALGISKSV  | ---   | QT    | P     |
| znt9_[Rattus_norvegicus]                       | WIYTGASMF  | SEAIHSLSDT | C     | ----  | NQGL  | LALGISKSV  | ---   | QT    | P     |
| isoform1_znt9_[Mus_musculus]                   | WIYTGASMF  | SEAIHSLSDT | C     | ----  | NQGL  | LALGISKSV  | ---   | QT    | P     |
| isoform2_znt9_[Mus_musculus]                   | WIYTGASMF  | SEAIHSLSDT | C     | ----  | NQGL  | LALGISKSV  | ---   | QT    | P     |
| znt9like_[E.Coli_partial]                      | ----GSAAML | NESIHSLVDC | G     | ----  | NQVL  | LLFGDKRAK  | ---   | RA    | Q     |
| znt9like_[Rhodanobacter_glycinis]              | AFITGSGAML | AEAIHSLADC | G     | ----  | NQGL  | LLLGMROAK  | ---   | RP    | P     |
| znt9like_[Dyella_ginsengisoli]                 | ALVTGSGAML | AEAVHSLADC | G     | ----  | NQGL  | LLLGVRQAK  | ---   | RP    | P     |
| znt9like2_[Actinobacteria_bacterium]           | FLLTGSAALL | AEAGHSVADT | G     | ----  | NQGL  | LMFGSKRGK  | ---   | RP    | A     |
| znt9like_[Firmicutes_bacterium]                | AVLTGSAALF | AETLHSFADT | G     | ----  | NQVL  | LLHGLRRSG  | ---   | RP    | A     |
| znt9-like3_[Candidatus_Micrarchaeota_archaeon] | AVLTGSTALL | AEGFHSLADT | A     | ----  | NQLF  | LLIGLRLSS  | ---   | RP    | P     |
| znt9like_[Mesorhizobium_sp._L2C054A000]        | AFFTGSSAML | SEGVHSLVDT | G     | ----  | NGGL  | LLYGMHRAA  | ---   | RP    | P     |
| znt9like_[Geopsychrobacter_electrodiphilus]    | AALTGSSAML | SEGIHSSVDT | G     | ----  | NQLL  | LLLGLHKAK  | ---   | QP    | A     |
| znt9like_[Sneathiella_limimaris]               | ATVTGSSAML | SEGVHSLVDT | G     | ----  | NQGL  | MLLGLKRAQ  | ---   | KG    | P     |
| znt9like_[Sneathiella_sp]                      | AFFTGSSAML | SEGVHSLVDT | G     | ----  | NQIL  | MLHGLKRAE  | ---   | KR    | A     |
| znt9like_[Sneathiella_chungangensis]           | AFFTGSSAML | SEGVHSLVDT | G     | ----  | NQIL  | MLHGLKRAA  | ---   | KR    | A     |
| znt9like_[Leptolyngbya_foveolarum]             | AYVSGSSAML | SEGIHSSVDS | V     | ----  | NEVL  | LLYGLKQSE  | ---   | AM    | P     |
| znt9like_[Massilia_sp._LC238]                  | AGVTGSAAMV | AEGIHSVADT | G     | ----  | NEFL  | LLYGERRSS  | ---   | RP    | A     |
| znt9like1_[Variovorax_paradoxus]               | AGITGSSAML | SEGIHSSVDT | F     | ----  | NGVL  | LLVGLRLSK  | ---   | RP    | P     |
| znt9like2_[Variovorax_paradoxus]               | AGITGSSAML | SEGIHSAVDT | F     | ----  | NGVL  | LLVGLKLSK  | ---   | RP    | A     |
| znt9like_[Nitrospira_sp._Nsp11]                | AAHTGSSAML | SEGIHSMVDT | G     | ----  | NQLL  | LLLGVNRSQ  | ---   | QP    | A     |
| znt9like_[Sorangium_cellulosum]                | AAVTGSSAML | SEGVHSLVDT | A     | ----  | DGLL  | LLL GKHRSA | ---   | RP    | P     |
| znt9like1_[Actinobacteria_bacterium]           | ASLTGSSAML | SEGIHSSVDT | G     | ----  | NGAL  | LFLGIRQSQ  | ---   | KP    | A     |
| znt9like_[Phormidismis_priestleyi]             | ASITGSSAML | SEGIHSSVDT | T     | ----  | NELL  | LLLGIHLSN  | ---   | RP    | P     |
| znt9like1_[Nosdoc_punctiforme]                 | ASITGSSAMI | SEGIHSSVDT | G     | ----  | DQLV  | LLLGLHRSQ  | ---   | KP    | A     |
| znt9like2_[Nosdoc_punctiforme]                 | AAITGSSAMI | SEGIHSIGDT | S     | ----  | DQLL  | LLLGLSRSQ  | ---   | KP    | A     |
| znt9like_[Nostoc_calcicola]                    | ASITGSSAMI | SEGIHSSVDT | G     | ----  | DQLL  | LLLGISRSQ  | ---   | KP    | A     |
| znt9like_[Nostoc_commune]                      | ASITGSSAMI | SEGIHSIVDT | S     | ----  | DQLL  | LLLGISRSQ  | ---   | KP    | A     |
| znt9like_[Nostoc_piscinale]                    | AFITNSSAMI | SEGIHSLVDT | A     | ----  | DQLL  | LLLGIHRSQ  | ---   | KP    | A     |

|                                                                         |             |             |   |       |      |       |        |     |        |   |     |
|-------------------------------------------------------------------------|-------------|-------------|---|-------|------|-------|--------|-----|--------|---|-----|
| znt9like_[Nostoc_cycadae]                                               | AFMTNSSAMI  | SEGIHSLVDT  | A | ----  | DQLL | LLL   | GIRMSQ | --- | KP     | A | --- |
| znt9like_[Myxosarcina_sp._GI1]                                          | AFITGSSAML  | SEGIHSIVDT  | G | ----  | NELL | LLL   | GLRLSK | --- | KP     | P | --- |
| znt9like_[Chondrocystis_sp._NIES-4102]                                  | AYITGSSAML  | SEGIHSVVDT  | G | ----  | NELL | LLL   | GIRLSK | --- | KP     | A | --- |
| znt9like_[Pleurocapsa_sp._PCC_7319]                                     | ASITGSSAML  | SEGIHSVVDT  | G | ----  | NELL | LLL   | GIRLSK | --- | KP     | A | --- |
| znt33D_[Drosophila_melanogaster]                                        | GILSNLSLAI  | TDAAHLLTDL  | A | ----  | SFLI | SIS   | ALHLAG | --- | RPS    |   | --- |
| transporter_[Pleurocapsa_sp._PCC_7319]                                  | GLAMGSLSDS  | ADALHSLSDS  | A | ----  | SNVL | GLIAM | RLAN   | --- | PK     | P | --- |
| transporter_[Leptolyngbya_foveolarum]                                   | GYWTGSLSLM  | ADALHSVTD   | A | ----  | NNVL | GLVTN | QLAS   | --- | PE     | P | --- |
| transporter_[Myxosarcina_sp._GI1]                                       | GFATGSLSLQ  | ADALHSITDS  | A | ----  | NNIL | GLIAN | RFSS   | --- | PL     | P | --- |
| transporter_[Chondrocystis_sp._NIES-4102]                               | GIATGSLSLQ  | ADALHSVTD   | A | ----  | NNIL | GLVTN | RFSS   | --- | PQ     | P | --- |
| transporter_[Phormidesmis_priestleyi]                                   | GLTTGSLSLL  | ADALHSLTDS  | A | ----  | SNVL | GLVAS | RFSS   | --- | PM     | P | --- |
| transporter_[Nostoc_piscinale]                                          | GYWTGSLSLL  | ADALHSVTD   | A | ----  | NNVL | GLFAS | KFSS   | --- | PH     | P | --- |
| transporter_[Nosdoc_punctiforme]                                        | GYWTGSLSLL  | ADALHSVTD   | A | ----  | NNVL | GLIAS | KFSS   | --- | PQ     | P | --- |
| transporter_[Nostoc_caldicola]                                          | GYWTGSLSLL  | ADALHSVTD   | A | ----  | NNVL | GLIAS | KFSS   | --- | PQ     | P | --- |
| cationtransporter3_[Firmicutes_bacterium]                               | GSMIKSVSLT  | ADGYHSLTDG  | S | ----  | SNIV | GLIAT | YLGA   | --- | KP     | V | --- |
| c.e.p_[Firmicutes_bacterium]                                            | GTTIGSVSMI  | ADGYHSLSDG  | S | ----  | SNVV | GLIGI | RFAS   | --- | QP     | V | --- |
| cationtransporter1_[Firmicutes_bacterium]                               | GVMIKSASMT  | ADGFHSITDG  | S | ----  | SNIV | GLIGI | HFAS   | --- | QP     | V | --- |
| cationtransporter2_[Firmicutes_bacterium]                               | GTIIKSASMT  | ADGFHSLTDG  | S | ----  | GNVV | GLIGV | YFAA   | --- | KP     | V | --- |
| cationtransporter1_[Actinobacteria_bacterium]                           | GIFTDSVAMT  | ADGFHSMFDG  | T | ----  | SNVI | GLLAM | AIAS   | --- | RP     | A | --- |
| cationtransporter2_[Actinobacteria_bacterium]                           | GTITNSAAMQ  | ADGFHSLFDG  | T | ----  | SNVV | GLVGM | YLAA   | --- | RP     | A | --- |
| c.e.p_[Candidatus_Woeseearchaeota_archaeon	CG08_land_8_20_14_0_20_43_7] | GFLGNSRALI  | ADAMHSFSDL  | G | ----  | TDII | TLIGV | KWGS   | --- | KP     | A | --- |
| transporter_[E.Coli]                                                    | GIFSGSQGLI  | ADGIHSLSDL  | V | ----  | SDFV | VLIAN | HKSK   | --- | KN     | P | --- |
| znt9-like2_[Candidatus_Micrarchaeota_archaeon]                          | GVLGTGSASVV | AEGIHSGMDV  | L | ----  | SSAI | SLG   | IKASK  | --- | KP     | I | --- |
| znt9-like_[Candidatus_Pacearchaeota_archaeon]                           | GILAKSASVL  | AEGIHSSMDV  | L | ----  | SSTI | SLIGI | KIAK   | --- | KP     | V | --- |
| znt9-like_[Candidatus_Aenigmarchaeota_archaeon_ex4484_52]               | GILSNNSASIL | AEGIHSGIDV  | L | ----  | SSLI | SLIGI | KIAK   | --- | KP     | V | --- |
| znt9-likel_[Candidatus_Micrarchaeota_archaeon]                          | GLLTNSLGLI  | AEFLHSLFDL  | L | ----  | ASVF | AFLG  | IRKAO  | --- | EP     | A | --- |
| znt9-like4_[Candidatus_Micrarchaeota_archaeon]                          | AFITGSIGLY  | AE SAHSLFDL | L | ----  | ASFL | AYL   | GIRKAE | --- | EP     | E | --- |
| znt9-like_[Candidatus_Woeseearchaeota_archaeon]                         | AAITGSIGLL  | AEAAHSFFDL  | L | ----  | ASAF | AYL   | GIRKAE | --- | QP     | D | --- |
| znt7_[Drosophila_melanogaster]                                          | GIVTNSLGLI  | SDSFHMFFDC  | T | ----  | GLLA | GLAAS | VITK   | --- | WK     |   | --- |
| znt7_[Danio_rerio]                                                      | GIWSNSLGLI  | SDSFHMFFDC  | T | ----  | ALLA | GLAAS | VISR   | --- | WR     |   | --- |
| znt7_human                                                              | GIWSNCLGLI  | SDSFHMFFDS  | T | ----  | AILA | GLAAS | VISK   | --- | WR     |   | --- |
| znt7_[Mus_musculus]                                                     | GIWSNCLGLI  | SDSFHMFFDS  | T | ----  | AILA | GLAAS | VISK   | --- | WR     |   | --- |
| znt7_[Rattus_norvegicus]                                                | GIWSNCLGLI  | SDSFHMFFDS  | T | ----  | AILA | GLAAS | VISK   | --- | WR     |   | --- |
| znt5-like_[Ciona_intestinalis]                                          | GAWSNSLGLI  | SDSFHMLFDC  | T | ----  | ALVL | GLVA  | AVMAK  | --- | WK     |   | --- |
| znt5_[Danio_rerio]                                                      | GVWTNSLGLI  | SDGFHMLFDC  | S | ----  | ALVL | GLFA  | ALMTR  | --- | WK     |   | --- |
| znt5_human                                                              | GVLTNLGLI   | SDGFHMLFDC  | S | ----  | ALVM | GLFA  | ALMSR  | --- | WK     |   | --- |
| znt5_[Mus_musculus]                                                     | GVLTNLGLI   | SDGFHMLFDC  | S | ----  | ALVM | GLFA  | ALMSR  | --- | WK     |   | --- |
| znt5_[Rattus_norvegicus]                                                | GVLTNLGLI   | SDGFHMLFDC  | S | ----  | ALVM | GLFA  | ALMSR  | --- | WK     |   | --- |
| znt6_[Ciona_intestinalis]                                               | CKSTNSLALR  | SFAYLTVDF   | F | ----  | TLIT | CMIS  | IWSTA  | --- | NQISQS |   | --- |
| znt6_[Danio_rerio]                                                      | CSSTNSMALT  | AYTYLTI FDL | F | ----  | SLIT | CLLS  | SLWVTM | --- | KKPS   |   | --- |
| znt6_human                                                              | CSSTNSIALT  | AYTYLTI FDL | F | ----  | SLMT | CLIS  | YVWTL  | --- | RKPS   |   | --- |
| znt6_[Rattus_norvegicus]                                                | CSSTNSIALT  | AYTYLTI FDL | F | ----  | SLIT | CLIS  | YVWMM  | --- | RRPS   |   | --- |
| znt6_isoform1_[Mus_musculus]                                            | CSSTNSIALT  | AYTYLTI FDL | F | SLFFF | SLIT | CLIS  | YVWMM  | --- | RKPS   |   | --- |
| znt6_isoform2_[Mus_musculus]                                            | CSSTNSIALT  | AYTYLTI FDL | F | ----  | SLIT | CLIS  | YVWMM  | --- | RKPS   |   | --- |
| znt4_[Danio_rerio]                                                      | GYVANSLAIM  | TDALHMLTDL  | I | ----  | GIIV | SLLA  | LWLSA  | --- | KPP    |   | --- |
| cationtransporter1_[Candidatus_Micrarchaeota_archaeon]                  | WYYSNSLALL  | GDIGHVFS DM | L | ----  | SLGV | SMA   | AVLAL  | --- | RAP    |   | --- |
| transporter_[Geopsychrobacter_electrodiphilus]                          | GLLSGSLSLI  | SDALHNFS DG | I | ----  | AIII | SYIA  | LHLSM  | --- | KPR    |   | --- |
| cationtransporter2_[Candidatus_Micrarchaeota_archaeon]                  | GILSGSLALI  | SDAGHNFS DV | L | ----  | ALLL | GYI   | GERFSS | --- | KKA    |   | --- |
| znt10_[Danio_rerio]                                                     | GYMGNSVALV  | SDSFNMLS DI | L | ----  | SLCV | GLTA  | ARVSR  | --- | RAGS   |   | --- |
| znt10_human                                                             | GYLGNLIALL  | SDSFNMLS DL | I | ----  | SLCV | GLS   | AGYIAR | --- | RPTR   |   | --- |
| znt10_[Mus_musculus]                                                    | GYLGNLIALL  | SDSFNMLS DL | I | ----  | SLCV | GLG   | SGYIAR | --- | RGPR   |   | --- |
| znt10_[Rattus_norvegicus]                                               | GYLGNLIALL  | SDSFNMLS DL | I | ----  | SLCV | GLG   | SGYIAR | --- | RGPR   |   | --- |
| znt1-likel_[Hydra_vulgaris]                                             | GYLNSMALV   | ADSFHMIT DF | A | ----  | ALII | GFIA  | LRIAN  | --- | KENND  |   | --- |
| znt1_[Ciona_intestinalis]                                               | GHLTSSLTLI  | ADSFHMLS DA | L | ----  | SLIV | ALIA  | VRMSK  | --- | RDAQQS |   | --- |
| znt1a_[Danio_rerio]                                                     | SRITSSLAML  | SDSFHMLS DV | I | ----  | ALVV | ALVA  | VRFAE  | --- | QTQS   |   | --- |
| znt1_human                                                              | SRVTSSLAML  | SDSFHMLS DV | L | ----  | ALVV | ALVA  | ERFAR  | --- | RTHA   |   | --- |

znt1\_[Mus\_musculus]  
znt1\_[Rattus\_norvegicus]  
znt1\_isoformG\_[Drosophila\_melanogaster]  
znt1\_isoformF\_[Drosophila\_melanogaster]  
znt1-like2\_[Hydra\_vulgaris]

|            |            |       |      |           |     |      |     |
|------------|------------|-------|------|-----------|-----|------|-----|
| SRVTASLAML | SDSFHMLSDV | L---- | ALVV | ALVAERFAR | --- | RTHA | --- |
| SRVTASLAML | SDSFHMLSDV | L---- | ALVV | ALVAERFAR | --- | RTHA | --- |
| GYVTNSMALV | ADSFHMLGDI | A---- | ALVI | SFLSVKMSP | --- | K--K | --- |
| GYVTNSMALV | ADSFHMLGDI | A---- | ALVI | SFLSVKMSP | --- | K--K | --- |
| GyltNSMALV | ADSFHMLSDV | V---- | SLLV | GYVALRYSK | --- | RGQT | --- |

|                                                |       |     |       |      |            |             |    |             |
|------------------------------------------------|-------|-----|-------|------|------------|-------------|----|-------------|
| znt4_human                                     | ----- | TKR | FTFGF | HRLE | VLSAMISVLL | VYILMGF     | LL | YEAVQRTIHM  |
| znt4_[Rattus_norvegicus]                       | ----- | TRR | FTFGF | HRLE | VLSAMISVML | VYVLMGF     | LL | YEAMQRTIHM  |
| znt4_isoforma_[Mus_musculus]                   | ----- | TRR | FTFGF | HRLE | VLSAMISVML | VYVLMGF     | LL | YEAVQRTIHM  |
| znt4_isoformb_[Mus_musculus]                   | ----- |     |       |      | VLSAMISVML | VYVLMGF     | LL | YEAVQRTIHM  |
| znt8_human                                     | ----- | SKR | LTFGW | HRAE | ILGALLSILC | IWVVTGV     | LV | YLACERLLYP  |
| znt8_[Mus_musculus]                            | ----- | SKR | LTFGW | YRAE | ILGALLSVLC | IWVVTGV     | LL | YLACERLLYP  |
| znt8_[Rattus_norvegicus]                       | ----- | SKR | LTFGW | YRAE | ILGALLSVLC | IWVVTGV     | LV | YLACERLLYP  |
| znt3_human                                     | ----- | TRT | MTFGW | HRSE | TLGALASVVS | LWMVTGI     | LL | YLAFLRLLHS  |
| znt3_[Rattus_norvegicus]                       | ----- | TRT | MTFGW | HRSE | TLGALASVVS | LWIVTGI     | LL | YLAFLRLLHS  |
| znt3_isoform1_[Mus_musculus]                   | ----- | TRT | MTFGW | HRSE | TLGALASVVS | LWIVTGI     | LL | YLAFLRLLHS  |
| znt3_isoform2_[Mus_musculus]                   | ----- | TRT | MTFGW | HRSE | TLGALASVVS | LWIVTGI     | LL | YLAFLRLLHS  |
| znt2-like_[Hydra_vulgaris]                     | ----- | SKK | LSFGW | HRAE | VMGAFLSVLI | IWVLTGV     | LV | FEAIKRVMNH  |
| znt35C_[Drosophila_melanogaster]               | ----- | TQR | MSFGW | YRAE | VIGAMASVFM | IWVITGI     | LV | WLAIGRLISG  |
| znt2_[Ciona_intestinalis]                      | ----- | SKK | MTFGW | HRAE | VIGALISVLA | IWIVTGV     | LV | YLAVMRLIHN  |
| znt8_[Danio_rerio]                             | ----- | TRT | LNFGW | HRAE | ILGALLSIFT | IWLVTGV     | LV | YLAVERIIND  |
| znt2_[Danio_rerio]                             | ----- | TKI | MNFGW | HRSE | ILGALISVMS | IWIVTGV     | LV | YLAIERIVKN  |
| znt3_isoformX1_[Danio_rerio]                   | ----- | TKI | MNFGW | HRSE | ILGALISVMS | IWIVTGV     | LV | YLAIERIVKN  |
| znt2_human                                     | ----- |     |       |      | ILGALVSVLS | IWVVTGV     | LV | YLAVERLLSG  |
| znt2_isoform1_[Mus_musculus]                   | ----- | TKT | MNFGW | HRAE | ILGALLSVLS | IWVVTGV     | LV | YLAVQRLISG  |
| znt2_isoform2_[Mus_musculus]                   | ----- | TKT | MNFGW | HRAE | ILGALLSVLS | IWVVTGV     | LV | YLAVQRLISG  |
| znt2_isoform1_[Rattus_norvegicus]              | ----- | TKT | MNFGW | QRAE | ILGALLSVLS | IWVVTGV     | LV | YLAVQRLISG  |
| znt2_isoform2_[Rattus_norvegicus]              | ----- | TKT | MNFGW | QRAE | ILGALLSVLS | IWVVTGV     | LV | YLAVQRLISG  |
| znt9-like_[Hydra_vulgaris]                     | ----- | SPD | HPYGW | VRSR | YIYSLVSGCG | IFFLGVGFTV  |    | YHGFSELMAP  |
| znt9_[Drosophila_melanogaster]                 | ----- | DID | HPYGY | MNMR | YVSSLSIGVG | IFCVGCGLSI  |    | YHGIDGILHP  |
| znt9-like_[Ciona_intestinalis]                 | ----- | DEE | HPYGF | GNMR | HIMSLISGVG | IFCIGCGASI  |    | YHGIQVLLHP  |
| znt9_[Danio_rerio]                             | ----- | DAI | HPYGF | SNMR | YIASLISGVG | IFMMGAGLSW  |    | YHGIMGLLHP  |
| znt9_human                                     | ----- | DPS | HPYGF | SNMR | YISSLSIGVG | IFMMGAGLSW  |    | YHGVMLLHP   |
| znt9_[Rattus_norvegicus]                       | ----- | DPS | HPYGF | SNMR | YISSLSIGVG | IFMMGAGLSW  |    | YHGIMGLLHP  |
| isoform1_znt9_[Mus_musculus]                   | ----- | DPS | HPYGF | SNMR | YISSLSIGVG | IFMMGAGLSW  |    | YHGIMGLLHP  |
| isoform2_znt9_[Mus_musculus]                   | ----- | DPS | HPYGF | SNMR | YISSLSIGVG | IFMMGAGLSW  |    | YHGIMGLLHP  |
| znt9like_[E.Coli_partial]                      | ----- | SQV | HPFGE | ARAK | YFFSMLVATF | LFVGGGVIGV  |    | MEAYDKLVHP  |
| znt9like_[Rhodanobacter_glycinis]              | ----- | SDD | YPLGW | GRAL | YFWSFLVALL | LFVSGGLFSI  |    | YEGVHKLHP   |
| znt9like_[Dyella_ginsengisoli]                 | ----- | SDE | FPLGW | GRAM | YFWSFLVAIL | LFVSGGMFSV  |    | YEGVHKLHP   |
| znt9like2_[Actinobacteria_bacterium]           | ----- | DSA | HPFGY | GPER | YFWSFIVALV | LFVSMGGLFAL |    | YEGISKVQHP  |
| znt9like_[Firmicutes_bacterium]                | ----- | DAA | HPFGY | GKEQ | YFWAFVVAIV | LFALGAVFSL  |    | VEGVEKVLAP  |
| znt9-like3_[Candidatus_Micrarchaeota_archaeon] | ----- | DLK | HPFGY | GKEG | YFWAFVVSIS | ILVVGATFSI  |    | HEGVQKVLQP  |
| znt9like_[Mesorhizobium_sp._L2C054A000]        | ----- | DRT | HPLGH | GREL | YFWSFIVALL | VFALGAGVSF  |    | YEGVVHIMAP  |
| znt9like_[Geopsychrobacter_electrodiphilus]    | ----- | DER | FPPGH | AKEV | YFWSFVVALL | IFAVGAGVSL  |    | YEGIHHLAHP  |
| znt9like_[Sneathiella_limimaris]               | ----- | DOK | HPFGY | GMEI | YFWSFMVAIL | IFALGAGISI  |    | YEGFHAIQDP  |
| znt9like_[Sneathiella_sp]                      | ----- | DAI | HPFGY | GMEI | YFWAFVVAIV | IFALGAGISL  |    | YEGIKHIAHP  |
| znt9like_[Sneathiella_chungangensis]           | ----- | DKD | HPFGY | GMEI | YFWAFVVAIV | IFALGAGISL  |    | YEGIKHIRHP  |
| znt9like_[Leptolyngbya_foveolarum]             | ----- | DEQ | HPLGR | SOEL | YFWSLMVAVL | IFALGGGVSF  |    | LOGIRSFONP  |
| znt9like_[Massilia_sp._LC238]                  | ----- | DRK | HPFGY | GKSL | YFWALIVAL  | VFSLGGGLSI  |    | YHGLDALENP  |
| znt9like1_[Variovorax_paradoxus]               | ----- | SVE | HPFGH | GKEL | YFWSLIVAVL | IFGLGGGVSF  |    | YEGIEHIRHP  |
| znt9like2_[Variovorax_paradoxus]               | ----- | TPE | HPFGH | GKEL | YFWSLIVGVL | IFGLGGGVSF  |    | YEGIQHMRAP  |
| znt9like_[Nitrosospira_sp._Nsp11]              | ----- | DSG | HPYGY | GKEL | YFWSLIVAMV | LFVGGGGMAI  |    | YEGTIIHIAHP |
| znt9like_[Sorangium_cellulosum]                | ----- | DAE | HPFGH | GKEL | YFWTLIVAIM | IFAAGGGVSI  |    | YEGILHLLHP  |
| znt9like1_[Actinobacteria_bacterium]           | ----- | DEA | HPFGH | GKEL | YFWSLIVAIS | IFGVGGGMSI  |    | YEGILHLLNP  |
| znt9like_[Phormidismis_priestleyi]             | ----- | DDR | HPFGH | GOEL | YFWTLIVAIL | IFAIGGGMSI  |    | YEGISHLTRP  |
| znt9like1_[Nosdoc_punctiforme]                 | ----- | DDS | HPFGY | GOEL | YFWTFIVAIL | IFAIGGGMSI  |    | YEGITHLINP  |
| znt9like2_[Nosdoc_punctiforme]                 | ----- | DDS | HPFGY | GOEL | YFWTLIVAIL | IFAIGGGMSI  |    | YEGITHLINP  |
| znt9like_[Nostoc_calcicola]                    | ----- | NDS | HPFGY | GOEL | YFWTFIVAIL | IFAIGGGMSI  |    | YEGITHLINP  |
| znt9like_[Nostoc_commune]                      | ----- | DDS | HPFGY | GOEL | YFWTFIVAIL | IFAIGGGMSI  |    | YEGITHLINP  |
| znt9like_[Nostoc_piscinale]                    | ----- | DDS | HPFGY | GOEL | YFWTFIVAI  | IFAIGGGMSI  |    | YEGITHLINP  |



|                                                                         |       |            |       |      |            |            |                   |
|-------------------------------------------------------------------------|-------|------------|-------|------|------------|------------|-------------------|
| znt9like_[Nostoc_cycadae]                                               | ----- | DDS        | HPFGY | GOEL | YFWTLIVAIF | IFAIAGGMSI | YEGITHLINP        |
| znt9like_[Myxosarcina_sp._GI1]                                          | ----- | DDT        | HPFGY | GOEL | YFWTLVVALF | IFAVGGGMSI | YEGVNHLLAP        |
| znt9like_[Chondrocystis_sp._NIES-4102]                                  | ----- | DES        | HPFGY | GHEL | YFWTLIVALL | IFGIGGGMSI | YEGIRHVRNP        |
| znt9like_[Pleurocapsa_sp._PCC_7319]                                     | ----- | DDS        | HPFGY | GOEL | YFWTLIVALF | IFAIAGGMSI | YEGINHVRHP        |
| znt33D_[Drosophila_melanogaster]                                        | ----- | SER        | LNYGW | HRAE | VIGAMVSIF  | IWVVTE     | --RHPRVHGH        |
| transporter_[Pleurocapsa_sp._PCC_7319]                                  | ----- | DWD        | HPYGH | SKFE | SLGALGVAGF | LIVAGTE    | IFGSALKRFLVFP     |
| transporter_[Leptolyngbya_foveolarum]                                   | ----- | DRD        | HPYGH | OKYE | AVGTLGIAAF | LGIACFE    | ILKGAGERIVLFG     |
| transporter_[Myxosarcina_sp._GI1]                                       | ----- | DRE        | HPYGH | QKFE | ALGALGIAAF | LGIACFE    | ILKGAVERIAFG      |
| transporter_[Chondrocystis_sp._NIES-4102]                               | ----- | DRE        | HPYGH | QKFE | AIGALGIAAF | LGIACFE    | ILRGAVEKVVFFA     |
| transporter_[Phormidesmis_priestleyi]                                   | ----- | DRD        | HPYGH | QKFE | AVSALGIAAF | LGIACFE    | ILQGAIERLM-G      |
| transporter_[Nostoc_piscinale]                                          | ----- | DRE        | HPYGH | QKFE | AVGALGIAAF | LGIACFE    | ILQGAIERIIKG      |
| transporter_[Nosdoc_punctiforme]                                        | ----- | DRE        | HPYGH | SKFE | AVGALGIAAF | LGIACFE    | ILQGAIERIIKG      |
| transporter_[Nostoc_calicicola]                                         | ----- | DRE        | HPYGH | SKFE | AVGALGIAAF | LGIACFE    | ILQGAIERIIKG      |
| cationtransporter3_[Firmicutes_bacterium]                               | ----- | DED        | HPYGH | KKFE | TLAALLIAIM | LGFLGCK    | ILFGAALRLANP      |
| c.e.p_[Firmicutes_bacterium]                                            | ----- | DED        | HPYGH | RKFE | TLAGLFIAGM | LFFVGGK    | IFFSaidRfMNP      |
| cationtransporter1_[Firmicutes_bacterium]                               | ----- | DED        | HPYGH | SKFE | MLAGLVIAGM | LFVLGGK    | IVIDAVSRFINP      |
| cationtransporter2_[Firmicutes_bacterium]                               | ----- | DRD        | HPYGH | GKCE | MFAGLLIAGM | LFLGGK     | IIIDAVNRFMSP      |
| cationtransporter1_[Actinobacteria_bacterium]                           | ----- | DDD        | HPYGH | AKYE | TFASAIIGAM | LLLAAWR    | VGSSAIERLINF      |
| cationtransporter2_[Actinobacteria_bacterium]                           | ----- | DHD        | HPYGH | GKYE | TYASAGIAAM | LLFAAYR    | IGSSAVTQLFGE      |
| c.e.p_[Candidatus_Woeseearchaeota_archaeon_CG08_land_8_20_14_0_20_43_7] | ----- | DED        | HYYGH | QKIE | SLAQFLMGLF | LVATAIG    | IGFSAGKAIYFH      |
| transporter_[E.Coli]                                                    | ----- | DDD        | HYYGH | HRYE | NGASLILGTI | LFIVGIG    | MLWSAVNKMKQP      |
| znt9-like2_[Candidatus_Micrarchaeota_archaeon]                          | ----- | DEM        | HPYGH | YKFE | VLSGLLITFI | LFITGIG    | IIYDAYLGFVNP      |
| znt9-like_[Candidatus_Pacearchaeota_archaeon]                           | ----- | DKK        | HPYGY | YKFE | VLSGFFITFI | LFATGIG    | IIYEAYKSFLDP      |
| znt9-like_[Candidatus_Aenigmarchaeota_archaeon_ex4484_52]               | ----- | DKK        | HPYGY | YKFE | VLAGLIITIM | LFTTGAG    | IIYNAINGFLSH      |
| znt9-likel_[Candidatus_Micrarchaeota_archaeon]                          | ----- | DRT        | HPYGH | EKFE | NLSSLLQIL  | IFVTAIW    | VA YEAIMRLYHP     |
| znt9-like4_[Candidatus_Micrarchaeota_archaeon]                          | ----- | DRT        | HFFGH | EKFE | NLSSMLQALL | ITGTASV    | VLFEAYQKFSEP      |
| znt9-like_[Candidatus_Woeseearchaeota_archaeon]                         | ----- | DPS        | HYYGH | ERFE | TLSSFLQALL | IMGTAFV    | ILWESYRRFLNP      |
| znt7_[Drosophila_melanogaster]                                          | -A-   | NDK        | FSYGY | VRAE | VLAGFVNSLF | LLFIAFF    | ILSEGVERLIEP      |
| znt7_[Danio_rerio]                                                      | -S-   | NDS        | FSYGY | VRAE | VLAGFVNGLF | LIFTAFF    | IFSEGVERALEP      |
| znt7_human                                                              | -D-   | NDA        | FSYGY | VRAE | VLAGFVNGLF | LIFTAFF    | IFSEGVERALAP      |
| znt7_[Mus_musculus]                                                     | -D-   | NDA        | FSYGY | VRAE | VLAGFVNGLF | LIFTAFF    | IFSEGVERALAP      |
| znt7_[Rattus_norvegicus]                                                | -D-   | NDA        | FSYGY | VRAE | VLAGFVNGLF | LIFTAFF    | IFSEGVERALAP      |
| znt5-like_[Ciona_intestinalis]                                          | -S-   | TRI        | FPYGY | GRVE | VLSGFVNGLF | LLVVAFF    | LFYEAFQRLIDP      |
| znt5_[Danio_rerio]                                                      | -A-   | TRI        | YSYGY | GRVE | ILSGFINGLF | LMVIAFF    | VFVESVTRLVDP      |
| znt5_human                                                              | -A-   | TRI        | FSYGY | GRIE | ILSGFINGLF | LIVIAFF    | VFMESVARLIDP      |
| znt5_[Mus_musculus]                                                     | -A-   | TRI        | FSYGY | GRIE | ILSGFINGLF | LIVIAFF    | VFMESVARLIDP      |
| znt5_[Rattus_norvegicus]                                                | -A-   | TRI        | FSYGY | GRIE | ILSGFINGLF | LIVIAFF    | VFMESVARLIDP      |
| znt6_[Ciona_intestinalis]                                               | ----- | EEGT       | IVFNY | ERIE | VVSVFSSVVL | ASLGSIF    | ILKECIIRIIDQ      |
| znt6_[Danio_rerio]                                                      | ----- | QI         | YSFGF | ORFE | VLAVFSSTVL | VQLGSLF    | ILKESVERFVEQ      |
| znt6_human                                                              | ----- | PV         | YSFGF | ERLE | VLAVFASTVL | AQLGALF    | ILKESAERFLEQ      |
| znt6_[Rattus_norvegicus]                                                | ----- | AA         | YSFGF | ERLE | VLAVFASTVL | AQLGALF    | ILKESAERFLEQ      |
| znt6_isoform1_[Mus_musculus]                                            | ----- | PV         | YSFGF | ERLE | VLAVFASTVL | AQLGALF    | ILKESAERFLEQ      |
| znt6_isoform2_[Mus_musculus]                                            | ----- | PV         | YSFGF | ERLE | VLAVFASTVL | AQLGALF    | ILKESAERFLEQ      |
| znt4_[Danio_rerio]                                                      | ----- | TYR        | FTFGL | HRLE | VLSAGISVLL | IYILTG     | LLNEAAQRTIHQ      |
| cationtransporter1_[Candidatus_Micrarchaeota_archaeon]                  | ----- | SSR        | YTFGL | HRAE | VFSAFFNGVL | LVLMA      | LLIA YEALLRIGTG   |
| transporter_[Geopsychrobacter_electrodiphilus]                          | ----- | TSQ        | YTFGL | KRAQ | ILAAVINS   | AVLLAV     | CIY LL REAFDKLLHP |
| cationtransporter2_[Candidatus_Micrarchaeota_archaeon]                  | ----- | TKR        | HSFGL | KRFE | VFTALINALA | LWAI       | GAY II FESVKRFYLP |
| znt10_[Danio_rerio]                                                     | ----- | G-R        | FSFGL | GRAE | VVGALANAVF | LIALCFS    | ISMESLKRRLAMP     |
| znt10_human                                                             | ----- | GFS        | ATYGY | ARAE | VVGALSNAVF | LTALCFT    | IFVEAVLRLARP      |
| znt10_[Mus_musculus]                                                    | ----- | GSS        | ATYGY | VRAE | VVGALSNAVF | LTALCFT    | IFVEAVLRLARP      |
| znt10_[Rattus_norvegicus]                                               | ----- | GSS        | ATYGY | VRAE | VVGALSNAVF | LTALCFT    | IFVEAVLRLARP      |
| znt1-likel_[Hydra_vulgaris]                                             | ----- | FRFSE      | FTFGW | VRVE | VLGGMINTVF | LLALCFS    | IFITSLKRFVQP      |
| znt1_[Ciona_intestinalis]                                               | ----- | TPWPSKQAYF | NTFGW | VRFE | VVGALINATF | LLALCIS    | IMMEAIKFFYDP      |
| znt1a_[Danio_rerio]                                                     | ----- | TNK        | NTFGW | IRAE | VMGALVNAVF | LTALCFT    | IILEAIERFTEP      |
| znt1_human                                                              | ----- | TQK        | NTFGW | IRAE | VMGALVNAIF | LTGLCFA    | ILLEAIERFIEP      |

znt1\_[Mus\_musculus]  
znt1\_[Rattus\_norvegicus]  
znt1\_isoformG\_[Drosophila\_melanogaster]  
znt1\_isoformF\_[Drosophila\_melanogaster]  
znt1-like2\_[Hydra\_vulgaris]

-----TQK NTFGW-IRAE VMGALVNAIF LTGLCFA-IL LEAVERFIEP  
-----TQK NTFGW-IRAE VMGALVNAIF LTGLCFA-IL LEAVERFIEP  
-----WSK NTFGW-ARAE VLGALVNAVF LVALCFS-IT IEACKRFIEE  
-----WSK NTFGW-ARAE VLGALVNAVF LVALCFS-IT IEACKRFIEE  
-----TSR YTFGW-VRAE VLGALVNAVF LVALCFS-IL VESFKRIVIS

|                                                |   |      |      |       |      |           |        |        |         |            |
|------------------------------------------------|---|------|------|-------|------|-----------|--------|--------|---------|------------|
| znt4_human                                     | N | ---- | ---- | YEIN  | ---- | GDIMLITAA | VGVA   | NVIMG  | FL      | LNQSGHR    |
| znt4_[Rattus_norvegicus]                       | N | ---- | ---- | YEIN  | ---- | GDVMLITAA | VGVA   | NVIMG  | FL      | LNQSGHH    |
| znt4_isoforma_[Mus_musculus]                   | N | ---- | ---- | YEIN  | ---- | GDVMLITAA | VGVA   | NVIMG  | FL      | LNQSGHH    |
| znt4_isoformb_[Mus_musculus]                   | N | ---- | ---- | YEIN  | ---- | GDVMLITAA | VGVA   | NVIMG  | FL      | LNQSGHH    |
| znt8_human                                     | D | ---- | ---- | YQIQ  | ---- | ATVMIIVSS | CAVA   | ANIVLT | VV      | LHQRCGLG   |
| znt8_[Mus_musculus]                            | D | ---- | ---- | YQIQ  | ---- | AGIMITVSG | CAVA   | ANIVLT | MI      | LHQRFNG    |
| znt8_[Rattus_norvegicus]                       | D | ---- | ---- | YQIQ  | ---- | AGIMITVSG | CAVA   | ANIVLT | LI      | LHQRHLLG   |
| znt3_human                                     | D | ---- | ---- | YHIE  | ---- | GGAMLLTAS | IAVCAN | LLMA   | FV      | LHQAGPP    |
| znt3_[Rattus_norvegicus]                       | D | ---- | ---- | YHIE  | ---- | AGAMLLTAS | IAVCAN | MIMA   | FV      | LHOTGAP    |
| znt3_isoform1_[Mus_musculus]                   | D | ---- | ---- | YHIE  | ---- | AGAMLLTAS | IAVCAN | LLMA   | FV      | LHOTGAP    |
| znt3_isoform2_[Mus_musculus]                   | D | ---- | ---- | YHIE  | ---- | AGAMLLTAS | IAVCAN | LLMA   | FV      | LHOTGAP    |
| znt2-like_[Hydra_vulgaris]                     | N | ---- | ---- | YELD  | ---- | PVVMLITSG | VGVV   | VNIVLG | II      | LAKTGHG    |
| znt35C_[Drosophila_melanogaster]               | D | ---- | ---- | YEVN  | ---- | AKIMLITSG | LAIL   | VNVIMG | VQ      | LQH-GHS    |
| znt2_[Ciona_intestinalis]                      | N | ---- | ---- | YEVN  | ---- | GKTMLITAS | LAVGF  | NILMG  | LV      | LHEHSHT    |
| znt8_[Danio_rerio]                             | N | ---- | ---- | FTIE  | ---- | GTVMLITSG | CAVLAN | IIMA   | LT      | LHQSGHG    |
| znt2_[Danio_rerio]                             | D | ---- | ---- | YEIE  | ---- | GRVMLLTSG | CAVV   | VNII   | ---     | ----       |
| znt3_isoformX1_[Danio_rerio]                   | D | ---- | ---- | YEIE  | ---- | GRVMLLTSG | CAVV   | VNII   | YI      | LHHSTTF    |
| znt2_human                                     | D | ---- | ---- | YEID  | ---- | GGTMLITSG | CAVAVN | IIMG   | LT      | LHQSGHG    |
| znt2_isoform1_[Mus_musculus]                   | D | ---- | ---- | YEIK  | ---- | GDTMLITSG | CAVAVN | LIMG   | LA      | LHQSGHG    |
| znt2_isoform2_[Mus_musculus]                   | D | ---- | ---- | YEIK  | ---- | GDTMLITSG | CAVAVN | LIMG   | LA      | LHQSGHG    |
| znt2_isoform1_[Rattus_norvegicus]              | D | ---- | ---- | YEIK  | ---- | GDTMLITSG | CAVAVN | IIMG   | LA      | LHQSGHG    |
| znt2_isoform2_[Rattus_norvegicus]              | D | ---- | ---- | YEIK  | ---- | GDTMLITSG | CAVAVN | IIMG   | LA      | LHQSGHG    |
| znt9-like_[Hydra_vulgaris]                     | T | ---- | ---- | M-LEY | ---- | LNVA      | YFVAA  | LSLII  | ESSM    | VLAFOQVRKS |
| znt9_[Drosophila_melanogaster]                 | E | ---- | ---- | P-ITD | ---- | LFWV      | YCILM  | GSLV   | SEGATL  | VVAINELKRS |
| znt9-like_[Ciona_intestinalis]                 | A | ---- | ---- | S-GL  | GL   | GNMMS     | SFVLL  | GAAV   | MESASL  | ALAVNETRRN |
| znt9_[Danio_rerio]                             | Q | ---- | ---- | P-IES | ---- | LLWAY     | CILA   | GSLV   | SEGATL  | LVAINELKRS |
| znt9_human                                     | Q | ---- | ---- | P-IES | ---- | LLWAY     | CILA   | GSLV   | SEGATL  | LVAVNELRRN |
| znt9_[Rattus_norvegicus]                       | Q | ---- | ---- | P-MES | ---- | LLWAY     | CILA   | GSLV   | SEGATL  | LVAINELRRS |
| isoform1_znt9_[Mus_musculus]                   | Q | ---- | ---- | P-MES | ---- | LLWAY     | CILA   | GSLV   | SEGATL  | LVAINELRRS |
| isoform2_znt9_[Mus_musculus]                   | Q | ---- | ---- | P-MES | ---- | LLWAY     | CILA   | GSLV   | SEGATL  | LVAINELRRS |
| znt9like_[E.Coli_partial]                      | A | ---- | ---- | HEVNN | ---- | PLLL      | IAILL  | FGMI   | IEGSSL  | RVAFKEIKEL |
| znt9like_[Rhodanobacter_glycinis]              | E | ---- | ---- | P-LKW | ---- | PWLAL     | GVLA   | FGIV   | AESFSM  | HGCLQEVNKA |
| znt9like_[Dyella_ginsengisoli]                 | E | ---- | ---- | P-LKW | ---- | PWVAL     | GVLV   | FGVVA  | EGLSM   | RGCLQEVNKA |
| znt9like2_[Actinobacteria_bacterium]           | H | ---- | ---- | E-VES | ---- | ATIA      | FVILG  | IAILLE | SYSL    | RTAVKEANH- |
| znt9like_[Firmicutes_bacterium]                | H | ---- | ---- | P-VEN | ---- | PLLS      | FIVLG  | LALV   | FEGSSF  | RVAWIEFNR  |
| znt9-like3_[Candidatus_Micrarchaeota_archaeon] | T | ---- | ---- | P-LAH | ---- | EGWAY     | LVL    | LSGS   | FEFYAW  | RAALKELRP  |
| znt9like_[Mesorhizobium_sp._L2C054A000]        | E | ---- | ---- | P-VAN | ---- | PKINY     | IVLG   | LSML   | FEGSSW  | YVALKEFRQ  |
| znt9like_[Geopsychrobacter_electrodiphilus]    | A | ---- | ---- | P-ITD | ---- | PYINY     | LVLG   | LAVL   | FEGLSL  | YFALSEFSR  |
| znt9like_[Sneathiella_limimaris]               | H | ---- | ---- | P-LNN | ---- | VVWNY     | SILG   | LGIV   | FEGWAW  | SVAYREFKK  |
| znt9like_[Sneathiella_sp]                      | E | ---- | ---- | P-ITD | ---- | PTWNY     | VVLG   | LAI    | FEGWAW  | TVAWLEFKR  |
| znt9like_[Sneathiella_chungangensis]           | E | ---- | ---- | I-ITD | ---- | PTWNY     | VVLG   | LAIL   | FEGWAW  | YVAFSEFQR  |
| znt9like_[Leptolyngbya_foveolarum]             | E | ---- | ---- | I-ASD | ---- | PLVSY     | GLV    | AAAV   | FEGAAL  | FVSIREFKKR |
| znt9like_[Massilia_sp._LC238]                  | P | ---- | ---- | P-LED | ---- | PLWNY     | VVLG   | VAAF   | FEGYSW  | NVSRKALNAV |
| znt9like1_[Variovorax_paradoxus]               | E | ---- | ---- | P-LGD | ---- | PTWNY     | VVLA   | AAAV   | FEGTSF  | LIALRQFRA  |
| znt9like2_[Variovorax_paradoxus]               | E | ---- | ---- | P-MRD | ---- | PTWNY     | VVLA   | AAFV   | FEGASF  | LIALKQFRA  |
| znt9like_[Nitrosospira_sp._Nsp11]              | K | ---- | ---- | P-LEE | ---- | PFWAY     | AILG   | ISVLL  | EGISW   | SFALRALLA  |
| znt9like_[Sorangium_cellulosum]                | R | ---- | ---- | P-IED | ---- | PTWNY     | VVLG   | AAAV   | FEGTSL  | AISIEHFKK  |
| znt9like1_[Actinobacteria_bacterium]           | S | ---- | ---- | P-LEN | ---- | PAVNY     | IVLA   | VAVV   | VEGASF  | VVAYRQFAR  |
| znt9like_[Phormidismis_priestleyi]             | N | ---- | ---- | P-IED | ---- | PTWNY     | VVLG   | IAMV   | FEGFSW  | SVALKELLP  |
| znt9like1_[Nosdoc_punctiforme]                 | S | ---- | ---- | P-LED | ---- | PIWNY     | IVLS   | IAI    | ILEGFSW | TVALKEFLP  |
| znt9like2_[Nosdoc_punctiforme]                 | S | ---- | ---- | P-LED | ---- | PMWNY     | IVLG   | VAI    | ILEGSSW | TVALREFLP  |
| znt9like_[Nostoc_calcicola]                    | S | ---- | ---- | P-LED | ---- | PKWNY     | IVLG   | VAIL   | LEGYSW  | TVALKEFLP  |
| znt9like_[Nostoc_commune]                      | S | ---- | ---- | P-LED | ---- | PMWNY     | IVLG   | VAIL   | LEGYSW  | TVALKEFLP  |
| znt9like_[Nostoc_piscinale]                    | S | ---- | ---- | P-LED | ---- | PMWNY     | IVLV   | VAIF   | FEGYSW  | TVALKEFLP  |



znt1\_[Mus\_musculus]  
znt1\_[Rattus\_norvegicus]  
znt1\_isoformG\_[Drosophila\_melanogaster]  
znt1\_isoformF\_[Drosophila\_melanogaster]  
znt1-like2\_[Hydra\_vulgaris]

|   |       |     |   |     |   |        |     |     |       |     |      |    |     |   |     |
|---|-------|-----|---|-----|---|--------|-----|-----|-------|-----|------|----|-----|---|-----|
| H | ----- | --- | E | MQQ | - | PLVVL  | SVG | V   | AGLLV | NVL | GL   | CL | FHH | S | GE  |
| H | ----- | --- | E | MQQ | - | PLVVL  | SVG | V   | AGLLV | NVL | GL   | CL | FHH | S | GE  |
| E | ----- | --- | P | IHE | - | PELLV  | I   | VGA | LGLLV | N   | VIGL | CL | LYE | H | --- |
| E | ----- | --- | P | IHE | - | PELLV  | I   | VGA | LGLLV | N   | VIGL | CL | LYE | H | --- |
| E | ----- | --- | P | IEN | - | PKLVLL | V   | GG  | LGLVV | N   | LVGL | ML | FHQ | H | --- |



|                                                                         |            |            |            |          |       |
|-------------------------------------------------------------------------|------------|------------|------------|----------|-------|
| znt9like_[Nostoc_cycadae]                                               | -----      | -----      | -----      | -----    | ----- |
| znt9like_[Myxosarcina_sp._GI1]                                          | -----      | -----      | -----      | -----    | ----- |
| znt9like_[Chondrocystis_sp._NIES-4102]                                  | -----      | -----      | -----      | -----    | ----- |
| znt9like_[Pleurocapsa_sp._PCC_7319]                                     | -----      | -----      | -----      | -----    | ----- |
| znt33D_[Drosophila_melanogaster]                                        | -----      | -----      | -----      | -----    | ----- |
| transporter_[Pleurocapsa_sp._PCC_7319]                                  | -----      | -----      | -----      | -----    | ----- |
| transporter_[Leptolyngbya_foveolarum]                                   | -----      | -----      | -----      | -----    | ----- |
| transporter_[Myxosarcina_sp._GI1]                                       | -----      | -----      | -----      | -----    | ----- |
| transporter_[Chondrocystis_sp._NIES-4102]                               | -----      | -----      | -----      | -----    | ----- |
| transporter_[Phormidesmis_priestleyi]                                   | -----      | -----      | -----      | -----    | ----- |
| transporter_[Nostoc_piscinale]                                          | -----      | -----      | -----      | -----    | ----- |
| transporter_[Nosdoc_punctiforme]                                        | -----      | -----      | -----      | -----    | ----- |
| transporter_[Nostoc_caldicola]                                          | -----      | -----      | -----      | -----    | ----- |
| cationtransporter3_[Firmicutes_bacterium]                               | -----      | -----      | -----      | -----    | ----- |
| c.e.p_[Firmicutes_bacterium]                                            | -----      | -----      | -----      | -----    | ----- |
| cationtransporter1_[Firmicutes_bacterium]                               | -----      | -----      | -----      | -----    | ----- |
| cationtransporter2_[Firmicutes_bacterium]                               | -----      | -----      | -----      | -----    | ----- |
| cationtransporter1_[Actinobacteria_bacterium]                           | -----      | -----      | -----      | -----    | ----- |
| cationtransporter2_[Actinobacteria_bacterium]                           | -----      | -----      | -----      | -----    | ----- |
| c.e.p_[Candidatus_Woeseearchaeota_archaeon_CG08_land_8_20_14_0_20_43_7] | -----      | -----      | -----      | -----    | ----- |
| transporter_[E.Coli]                                                    | -----      | -----      | -----      | -----    | ----- |
| znt9-like2_[Candidatus_Micrarchaeota_archaeon]                          | -----      | -----      | -----      | -----    | ----- |
| znt9-like_[Candidatus_Pacearchaeota_archaeon]                           | -----      | -----      | -----      | -----    | ----- |
| znt9-like_[Candidatus_Aenigmarchaeota_archaeon_ex4484_52]               | -----      | -----      | -----      | -----    | ----- |
| znt9-likel1_[Candidatus_Micrarchaeota_archaeon]                         | -----      | -----      | -----      | -----    | ----- |
| znt9-like4_[Candidatus_Micrarchaeota_archaeon]                          | -----      | -----      | -----      | -----    | ----- |
| znt9-like_[Candidatus_Woeseearchaeota_archaeon]                         | -----      | -----      | -----      | -----    | ----- |
| znt7_[Drosophila_melanogaster]                                          | G-----HS   | HGGHGHSHGG | G-----HGHG | HS       | ----- |
| znt7_[Danio_rerio]                                                      | G-----HS   | HGGDDHGHSH | SLFNLSAAHG | HS       | ----- |
| znt7_human                                                              | G-----HS   | HG-SGHGHSH | SLFNALDQA  | HG       | ----- |
| znt7_[Mus_musculus]                                                     | G-----HS   | HG-SGHGHSH | SLFNALDHS  | HG       | ----- |
| znt7_[Rattus_norvegicus]                                                | G-----HS   | HG-SGHGHSH | SLFNALDHS  | HG       | ----- |
| znt5-like_[Ciona_intestinalis]                                          | -----HN    | HG-HSHGHN  | -----      | -----    | ----- |
| znt5_[Danio_rerio]                                                      | -----      | HG-ASKGSCS | G-----HDHG | HS       | ----- |
| znt5_human                                                              | -----HA    | HG-ASQGSCH | S-----SDHS | HS       | ----- |
| znt5_[Mus_musculus]                                                     | -----HG    | HG-ASQGNCH | S-----DHG  | HS       | ----- |
| znt5_[Rattus_norvegicus]                                                | -----HG    | HG-PSQGHCH | S-----DHG  | HS       | ----- |
| znt6_[Ciona_intestinalis]                                               | C-----     | -----      | -----IT    | N        | ----- |
| znt6_[Danio_rerio]                                                      | F-----     | -----      | -----VS    | E        | ----- |
| znt6_human                                                              | Y-----     | -----      | -----VS    | E        | ----- |
| znt6_[Rattus_norvegicus]                                                | Y-----     | -----      | -----VS    | E        | ----- |
| znt6_isoform1_[Mus_musculus]                                            | Y-----     | -----      | -----VS    | E        | ----- |
| znt6_isoform2_[Mus_musculus]                                            | Y-----     | -----      | -----VS    | E        | ----- |
| znt4_[Danio_rerio]                                                      | HSHGHGHHS  | HGSAGHSSD  | -----      | -----    | ----- |
| cationtransporter1_[Candidatus_Micrarchaeota_archaeon]                  | -----      | -----      | -----      | -----    | ----- |
| transporter_[Geopsychrobacter_electrodiphilus]                          | -----      | -----      | -----      | -----    | ----- |
| cationtransporter2_[Candidatus_Micrarchaeota_archaeon]                  | -----      | -----      | -----      | -----    | ----- |
| znt10_[Danio_rerio]                                                     | C-GRR--GKE | KK-----REE | HREDREQ    | -----    | ----- |
| znt10_human                                                             | F-ACCLRGRS | RR-----LOQ | ROQLAEG    | -----CVP | ----- |
| znt10_[Mus_musculus]                                                    | F-SRCTRGRR | TR-----PSQ | Q--PSQG    | -----DPR | ----- |
| znt10_[Rattus_norvegicus]                                               | F-SRCTRGRH | TR-----PSQ | P--PRQG    | -----DTG | ----- |
| znt1-likel1_[Hydra_vulgaris]                                            | I-FRKFF    | -----      | AKKKRTK    | -D       | SLEN  |
| znt1_[Ciona_intestinalis]                                               | G-HDHGHGHN | HG-HDHSHG  | EHE--NG    | -N       | HHTH  |
| znt1a_[Danio_rerio]                                                     | --GGGHGHS  | HGGHGHSHGG | AKKHKNG    | -K       | VRRS  |
| znt1_human                                                              | S-QDSGHGHS | HGGHGHGHGL | PKGPRVK    | -S       | TRPG  |





|                                                |  |  |  |  |
|------------------------------------------------|--|--|--|--|
| znt4_human                                     |  |  |  |  |
| znt4_[Rattus_norvegicus]                       |  |  |  |  |
| znt4_isoforma_[Mus_musculus]                   |  |  |  |  |
| znt4_isoformb_[Mus_musculus]                   |  |  |  |  |
| znt8_human                                     |  |  |  |  |
| znt8_[Mus_musculus]                            |  |  |  |  |
| znt8_[Rattus_norvegicus]                       |  |  |  |  |
| znt3_human                                     |  |  |  |  |
| znt3_[Rattus_norvegicus]                       |  |  |  |  |
| znt3_isoform1_[Mus_musculus]                   |  |  |  |  |
| znt3_isoform2_[Mus_musculus]                   |  |  |  |  |
| znt2-like_[Hydra_vulgaris]                     |  |  |  |  |
| znt35C_[Drosophila_melanogaster]               |  |  |  |  |
| znt2_[Ciona_intestinalis]                      |  |  |  |  |
| znt8_[Danio_rerio]                             |  |  |  |  |
| znt2_[Danio_rerio]                             |  |  |  |  |
| znt3_isoformX1_[Danio_rerio]                   |  |  |  |  |
| znt2_human                                     |  |  |  |  |
| znt2_isoform1_[Mus_musculus]                   |  |  |  |  |
| znt2_isoform2_[Mus_musculus]                   |  |  |  |  |
| znt2_isoform1_[Rattus_norvegicus]              |  |  |  |  |
| znt2_isoform2_[Rattus_norvegicus]              |  |  |  |  |
| znt9-like_[Hydra_vulgaris]                     |  |  |  |  |
| znt9_[Drosophila_melanogaster]                 |  |  |  |  |
| znt9-like_[Ciona_intestinalis]                 |  |  |  |  |
| znt9_[Danio_rerio]                             |  |  |  |  |
| znt9_human                                     |  |  |  |  |
| znt9_[Rattus_norvegicus]                       |  |  |  |  |
| isoform1_znt9_[Mus_musculus]                   |  |  |  |  |
| isoform2_znt9_[Mus_musculus]                   |  |  |  |  |
| znt9like_[E.Coli_partial]                      |  |  |  |  |
| znt9like_[Rhodanobacter_glycinis]              |  |  |  |  |
| znt9like_[Dyella_ginsengisoli]                 |  |  |  |  |
| znt9like2_[Actinobacteria_bacterium]           |  |  |  |  |
| znt9like_[Firmicutes_bacterium]                |  |  |  |  |
| znt9-like3_[Candidatus_Micrarchaeota_archaeon] |  |  |  |  |
| znt9like_[Mesorhizobium_sp._L2C054A000]        |  |  |  |  |
| znt9like_[Geopsychrobacter_electrodiphilus]    |  |  |  |  |
| znt9like_[Sneathiella_limimaris]               |  |  |  |  |
| znt9like_[Sneathiella_sp]                      |  |  |  |  |
| znt9like_[Sneathiella_chungangensis]           |  |  |  |  |
| znt9like_[Leptolyngbya_foveolarum]             |  |  |  |  |
| znt9like_[Massilia_sp._LC238]                  |  |  |  |  |
| znt9like1_[Variovorax_paradoxus]               |  |  |  |  |
| znt9like2_[Variovorax_paradoxus]               |  |  |  |  |
| znt9like_[Nitrosospira_sp._Nsp11]              |  |  |  |  |
| znt9like_[Sorangium_cellulosum]                |  |  |  |  |
| znt9like1_[Actinobacteria_bacterium]           |  |  |  |  |
| znt9like_[Phormidesmis_priestleyi]             |  |  |  |  |
| znt9like1_[Nosdoc_punctiforme]                 |  |  |  |  |
| znt9like2_[Nosdoc_punctiforme]                 |  |  |  |  |
| znt9like_[Nostoc_calcicola]                    |  |  |  |  |
| znt9like_[Nostoc_commune]                      |  |  |  |  |
| znt9like_[Nostoc_piscinale]                    |  |  |  |  |



znt1\_[Mus\_musculus]  
znt1\_[Rattus\_norvegicus]  
znt1\_isoformG\_[Drosophila\_melanogaster]  
znt1\_isoformF\_[Drosophila\_melanogaster]  
znt1-like2\_[Hydra\_vulgaris]

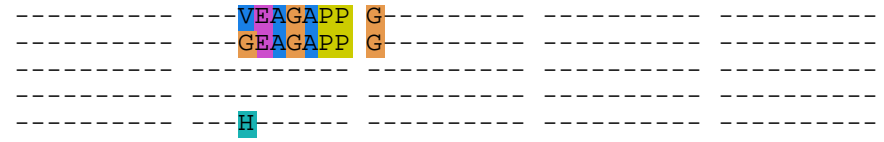

|                                                |            |           |       |       |
|------------------------------------------------|------------|-----------|-------|-------|
| znt4_human                                     | -----      | -----     | ----- | ----- |
| znt4_[Rattus_norvegicus]                       | -----      | -----     | ----- | ----- |
| znt4_isoforma_[Mus_musculus]                   | -----      | -----     | ----- | ----- |
| znt4_isoformb_[Mus_musculus]                   | -----      | -----     | ----- | ----- |
| znt8_human                                     | -----      | -----     | ----- | ----- |
| znt8_[Mus_musculus]                            | -----      | -----     | ----- | ----- |
| znt8_[Rattus_norvegicus]                       | -----      | -----     | ----- | ----- |
| znt3_human                                     | -----      | -----     | ----- | ----- |
| znt3_[Rattus_norvegicus]                       | -----      | -----     | ----- | ----- |
| znt3_isoform1_[Mus_musculus]                   | -----      | -----     | ----- | ----- |
| znt3_isoform2_[Mus_musculus]                   | -----      | -----     | ----- | ----- |
| znt2-like_[Hydra_vulgaris]                     | -----      | -----     | ----- | ----- |
| znt35C_[Drosophila_melanogaster]               | GVAYAPEDAE | LPGGGLPTF | SY    | ----- |
| znt2_[Ciona_intestinalis]                      | -----      | -----     | ----- | ----- |
| znt8_[Danio_rerio]                             | -----      | -----     | ----- | ----- |
| znt2_[Danio_rerio]                             | -----      | -----     | ----- | ----- |
| znt3_isoformX1_[Danio_rerio]                   | -----      | -----     | ----- | ----- |
| znt2_human                                     | -----      | -----     | ----- | ----- |
| znt2_isoform1_[Mus_musculus]                   | -----      | -----     | ----- | ----- |
| znt2_isoform2_[Mus_musculus]                   | -----      | -----     | ----- | ----- |
| znt2_isoform1_[Rattus_norvegicus]              | -----      | -----     | ----- | ----- |
| znt2_isoform2_[Rattus_norvegicus]              | -----      | -----     | ----- | ----- |
| znt9-like_[Hydra_vulgaris]                     | -----      | AQETGVTFR | ----- | ----- |
| znt9_[Drosophila_melanogaster]                 | -----      | AKENNMSFK | ----- | ----- |
| znt9-like_[Ciona_intestinalis]                 | -----      | AKKYELSFW | ----- | ----- |
| znt9_[Danio_rerio]                             | -----      | ARTQGLSFY | ----- | ----- |
| znt9_human                                     | -----      | ARAKGMSFY | ----- | ----- |
| znt9_[Rattus_norvegicus]                       | -----      | AQANGTSFY | ----- | ----- |
| isoform1_znt9_[Mus_musculus]                   | -----      | AQAKGTFY  | ----- | ----- |
| isoform2_znt9_[Mus_musculus]                   | -----      | AQAKGTFY  | ----- | ----- |
| znt9like_[E.Coli_partial]                      | -----      | N-TEKLPLF | ----- | ----- |
| znt9like_[Rhodanobacter_glycinis]              | -----      | R-GERSLW  | ----- | ----- |
| znt9like_[Dyella_ginsengisoli]                 | -----      | R-GGQPLW  | ----- | ----- |
| znt9like2_[Actinobacteria_bacterium]           | -----      | V-RNGRTWW | ----- | ----- |
| znt9like_[Firmicutes_bacterium]                | -----      | S-RRGKGVL | ----- | ----- |
| znt9-like3_[Candidatus_Micrarchaeota_archaeon] | -----      | S-IRKQVVL | ----- | ----- |
| znt9like_[Mesorhizobium_sp._L2C054A000]        | -----      | Q-KGKQGWL | ----- | ----- |
| znt9like_[Geopsychrobacter_electrodiphilus]    | -----      | T-KGTRSYF | ----- | ----- |
| znt9like_[Sneathiella_limimaris]               | -----      | V-IGDQSIW | ----- | ----- |
| znt9like_[Sneathiella_sp]                      | -----      | G-IGKRGIW | ----- | ----- |
| znt9like_[Sneathiella_chungangensis]           | -----      | G-RGKRFSW | ----- | ----- |
| znt9like_[Leptolyngbya_foveolarum]             | -----      | DSNADLGLW | ----- | ----- |
| znt9like_[Massilia_sp._LC238]                  | -----      | R-KPGTTLW | ----- | ----- |
| znt9like1_[Variovorax_paradoxus]               | -----      | Q-AGGTPFW | ----- | ----- |
| znt9like2_[Variovorax_paradoxus]               | -----      | Q-ANGTPFW | ----- | ----- |
| znt9like_[Nitrosospira_sp._Nsp11]              | -----      | E-KGKHTLW | ----- | ----- |
| znt9like_[Sorangium_cellulosum]                | -----      | -KDGQGYV  | ----- | ----- |
| znt9like1_[Actinobacteria_bacterium]           | -----      | A-RGGMPSW | ----- | ----- |
| znt9like_[Phormidesmis_priestleyi]             | -----      | S-VGNQTIW | ----- | ----- |
| znt9like1_[Nosdoc_punctiforme]                 | -----      | T-KGKQNFW | ----- | ----- |
| znt9like2_[Nosdoc_punctiforme]                 | -----      | T-KGKQNFW | ----- | ----- |
| znt9like_[Nostoc_calcicola]                    | -----      | T-KRKQNFW | ----- | ----- |
| znt9like_[Nostoc_commune]                      | -----      | T-KGKQNFW | ----- | ----- |
| znt9like_[Nostoc_piscinale]                    | -----      | T-KGNQSFW | ----- | ----- |

|                                                                         |       |          |            |             |       |       |
|-------------------------------------------------------------------------|-------|----------|------------|-------------|-------|-------|
| znt9like_[Nostoc_cycadae]                                               | ----- | T        | KGNQTFW    | -----       | ----- | ----- |
| znt9like_[Myxosarcina_sp._GI1]                                          | ----- | K        | KGDEDIW    | -----       | ----- | ----- |
| znt9like_[Chondrocystis_sp._NIES-4102]                                  | ----- | S        | KNEANFW    | -----       | ----- | ----- |
| znt9like_[Pleurocapsa_sp._PCC_7319]                                     | ----- | S        | KNEDSFW    | -----       | ----- | ----- |
| znt33D_[Drosophila_melanogaster]                                        | ----- | -----    | -----      | -----       | ----- | ----- |
| transporter_[Pleurocapsa_sp._PCC_7319]                                  | ----- | ESLT     | VS-N-LNLMM | MIGVLIINII  | VALY  | ----- |
| transporter_[Leptolyngbya_foveolarum]                                   | ----- | EPVR     | ME-A-MALWI | MLAVLGINIF  | VAFY  | ----- |
| transporter_[Myxosarcina_sp._GI1]                                       | ----- | KPVE     | VA-P-SELWL | LSIVLIVNIF  | VAFY  | ----- |
| transporter_[Chondrocystis_sp._NIES-4102]                               | ----- | TSVE     | VS-P-GELWL | LLVVLGVNIF  | VAFY  | ----- |
| transporter_[Phormidesmis_priestleyi]                                   | ----- | KPIQ     | IS-A-GELWL | LLIVLGINIF  | VTYY  | ----- |
| transporter_[Nostoc_piscinale]                                          | ----- | EPVR     | IL-P-PELWL | LLIVLGVNIF  | VAFY  | ----- |
| transporter_[Nosdoc_punctiforme]                                        | ----- | EPVK     | IS-P-PELWL | LLIVLGVNIF  | VAFY  | ----- |
| transporter_[Nostoc_caldicola]                                          | ----- | EPVK     | IS-P-PELWL | LLIVLGVNIF  | VAFY  | ----- |
| cationtransporter3_[Firmicutes_bacterium]                               | ----- | VLPE     | VS-V-ESLLA | LSATLGMNIF  | IARY  | ----- |
| c.e.p_[Firmicutes_bacterium]                                            | ----- | VVPN     | IT-L-SSLIV | LLATLCTNIF  | VCVY  | ----- |
| cationtransporter1_[Firmicutes_bacterium]                               | ----- | ITPE     | VT-L-ESILI | LLLTLCVNVF  | VSRY  | ----- |
| cationtransporter2_[Firmicutes_bacterium]                               | ----- | LWPE     | IT-P-ESLIF | LLSTLCINIF  | VSMF  | ----- |
| cationtransporter1_[Actinobacteria_bacterium]                           | ----- | EIAR     | VG-A-MSFVV | MFVTLGINIF  | VARY  | ----- |
| cationtransporter2_[Actinobacteria_bacterium]                           | ----- | QPID     | VT-P-LSFAI | MLGTLAVNVF  | ITTW  | ----- |
| c.e.p_[Candidatus_Woeseearchaeota_archaeon_CG08_land_8_20_14_0_20_43_7] | ----- | EV-N     | HP-GLIAIFA | AALS VVSKEV | LYRY  | ----- |
| transporter_[E.Coli]                                                    | ----- | DDIP     | QV-HIVAMWV | ALAALVIKEL  | LFYR  | ----- |
| znt9-like2_[Candidatus_Micrarchaeota_archaeon]                          | ----- | SQIK     | AE-Y-LAIAI | MLISAVANEI  | MARV  | ----- |
| znt9-like_[Candidatus_Pacearchaeota_archaeon]                           | ----- | NKLV     | LT-Y-FALGI | MIFSAIINEV  | MARL  | ----- |
| znt9-like_[Candidatus_Aenigmarchaeota_archaeon_ex4484_52]               | ----- | PESK     | LS-Y-FAFGI | MIFSAIINEF  | MARL  | ----- |
| znt9-likel_[Candidatus_Micrarchaeota_archaeon]                          | ----- | QPIE     | ST-Q-LGLAV | MLAALAI DWF | FSKF  | ----- |
| znt9-like4_[Candidatus_Micrarchaeota_archaeon]                          | ----- | GKVD     | FS-E-AGILL | MLISIPVITYF | TSRY  | ----- |
| znt9-like_[Candidatus_Woeseearchaeota_archaeon]                         | ----- | SPVE     | HS-E-WGILL | MAVSI PVAYF | TARY  | ----- |
| znt7_[Drosophila_melanogaster]                                          | ----- | -----    | -----      | -----       | ----- | ----- |
| znt7_[Danio_rerio]                                                      | ----- | -----    | -----      | -----       | ----- | ----- |
| znt7_human                                                              | ----- | -----    | -----      | -----       | ----- | ----- |
| znt7_[Mus_musculus]                                                     | ----- | -----    | -----      | -----       | ----- | ----- |
| znt7_[Rattus_norvegicus]                                                | ----- | -----    | -----      | -----       | ----- | ----- |
| znt5-like_[Ciona_intestinalis]                                          | ----- | -----    | -----      | -----       | ----- | ----- |
| znt5_[Danio_rerio]                                                      | ----- | -----    | -----      | -----       | ----- | ----- |
| znt5_human                                                              | ----- | -----    | -----      | -----       | ----- | ----- |
| znt5_[Mus_musculus]                                                     | ----- | -----    | -----      | -----       | ----- | ----- |
| znt5_[Rattus_norvegicus]                                                | ----- | -----    | -----      | -----       | ----- | ----- |
| znt6_[Ciona_intestinalis]                                               | ----- | -----    | -----      | -----       | ----- | ----- |
| znt6_[Danio_rerio]                                                      | ----- | -----    | MSQTLCSII  | -----       | ----- | ----- |
| znt6_human                                                              | ----- | -----    | LSRSLCGLI  | -----       | ----- | ----- |
| znt6_[Rattus_norvegicus]                                                | ----- | -----    | LSRSLCGII  | -----       | ----- | ----- |
| znt6_isoform1_[Mus_musculus]                                            | ----- | -----    | LSRSLCGII  | -----       | ----- | ----- |
| znt6_isoform2_[Mus_musculus]                                            | ----- | -----    | LSRSLCGLI  | -----       | ----- | ----- |
| znt6_[Rattus_norvegicus]                                                | ----- | -----    | LSRSLCGLI  | -----       | ----- | ----- |
| znt4_[Danio_rerio]                                                      | ----- | -----    | -----      | -----       | ----- | ----- |
| cationtransporter1_[Candidatus_Micrarchaeota_archaeon]                  | ----- | -----    | -----      | -----       | ----- | ----- |
| transporter_[Geopsychrobacter_electrodiphilus]                          | ----- | -----    | -----      | -----       | ----- | ----- |
| cationtransporter2_[Candidatus_Micrarchaeota_archaeon]                  | ----- | -----    | -----      | -----       | ----- | ----- |
| znt10_[Danio_rerio]                                                     | ----- | -----    | -----      | -----       | ----- | ----- |
| znt10_human                                                             | ----- | -----    | -----      | -----       | ----- | ----- |
| znt10_[Mus_musculus]                                                    | ----- | AADPTAP  | GSDSAVTLR  | -----       | ----- | ----- |
| znt10_[Rattus_norvegicus]                                               | ----- | AATATAP  | GSGTAVTLR  | -----       | ----- | ----- |
| znt1-likel_[Hydra_vulgaris]                                             | ----- | AATATDP  | GSDSAVTLR  | -----       | ----- | ----- |
| znt1_[Ciona_intestinalis]                                               | ----- | -----    | VSLM       | -----       | ----- | ----- |
| znt1a_[Danio_rerio]                                                     | ----- | TLED SRS | AGEETNNLV  | -----       | ----- | ----- |
| znt1_human                                                              | ----- | APGEQGP  | DQEETNTLV  | -----       | ----- | ----- |

znt1\_[Mus\_musculus]  
znt1\_[Rattus\_norvegicus]  
znt1\_isoformG\_[Drosophila\_melanogaster]  
znt1\_isoformF\_[Drosophila\_melanogaster]  
znt1-like2\_[Hydra\_vulgaris]

```
---RAPD--- -QEETNTLV-----  
---RAPDQEP---DQEETNTLV-----  
-----EDEQNDFA-----  
-----EDEQNDFA-----  
-----ESPEKNLL-----
```

|                                                |  |  |  |  |
|------------------------------------------------|--|--|--|--|
| znt4_human                                     |  |  |  |  |
| znt4_[Rattus_norvegicus]                       |  |  |  |  |
| znt4_isoforma_[Mus_musculus]                   |  |  |  |  |
| znt4_isoformb_[Mus_musculus]                   |  |  |  |  |
| znt8_human                                     |  |  |  |  |
| znt8_[Mus_musculus]                            |  |  |  |  |
| znt8_[Rattus_norvegicus]                       |  |  |  |  |
| znt3_human                                     |  |  |  |  |
| znt3_[Rattus_norvegicus]                       |  |  |  |  |
| znt3_isoform1_[Mus_musculus]                   |  |  |  |  |
| znt3_isoform2_[Mus_musculus]                   |  |  |  |  |
| znt2-like_[Hydra_vulgaris]                     |  |  |  |  |
| znt35C_[Drosophila_melanogaster]               |  |  |  |  |
| znt2_[Ciona_intestinalis]                      |  |  |  |  |
| znt8_[Danio_rerio]                             |  |  |  |  |
| znt2_[Danio_rerio]                             |  |  |  |  |
| znt3_isoformX1_[Danio_rerio]                   |  |  |  |  |
| znt2_human                                     |  |  |  |  |
| znt2_isoform1_[Mus_musculus]                   |  |  |  |  |
| znt2_isoform2_[Mus_musculus]                   |  |  |  |  |
| znt2_isoform1_[Rattus_norvegicus]              |  |  |  |  |
| znt2_isoform2_[Rattus_norvegicus]              |  |  |  |  |
| znt9-like_[Hydra_vulgaris]                     |  |  |  |  |
| znt9_[Drosophila_melanogaster]                 |  |  |  |  |
| znt9-like_[Ciona_intestinalis]                 |  |  |  |  |
| znt9_[Danio_rerio]                             |  |  |  |  |
| znt9_human                                     |  |  |  |  |
| znt9_[Rattus_norvegicus]                       |  |  |  |  |
| isoform1_znt9_[Mus_musculus]                   |  |  |  |  |
| isoform2_znt9_[Mus_musculus]                   |  |  |  |  |
| znt9like_[E.Coli_partial]                      |  |  |  |  |
| znt9like_[Rhodanobacter_glycinis]              |  |  |  |  |
| znt9like_[Dyella_ginsengisoli]                 |  |  |  |  |
| znt9like2_[Actinobacteria_bacterium]           |  |  |  |  |
| znt9like_[Firmicutes_bacterium]                |  |  |  |  |
| znt9-like3_[Candidatus_Micrarchaeota_archaeon] |  |  |  |  |
| znt9like_[Mesorhizobium_sp._L2C054A000]        |  |  |  |  |
| znt9like_[Geopsychrobacter_electrodiphilus]    |  |  |  |  |
| znt9like_[Sneathiella_limimaris]               |  |  |  |  |
| znt9like_[Sneathiella_sp]                      |  |  |  |  |
| znt9like_[Sneathiella_chungangensis]           |  |  |  |  |
| znt9like_[Leptolyngbya_foveolarum]             |  |  |  |  |
| znt9like_[Massilia_sp._LC238]                  |  |  |  |  |
| znt9like1_[Variovorax_paradoxus]               |  |  |  |  |
| znt9like2_[Variovorax_paradoxus]               |  |  |  |  |
| znt9like_[Nitrosospira_sp._Nsp11]              |  |  |  |  |
| znt9like_[Sorangium_cellulosum]                |  |  |  |  |
| znt9like1_[Actinobacteria_bacterium]           |  |  |  |  |
| znt9like_[Phormidesmis_priestleyi]             |  |  |  |  |
| znt9like1_[Nosdoc_punctiforme]                 |  |  |  |  |
| znt9like2_[Nosdoc_punctiforme]                 |  |  |  |  |
| znt9like_[Nostoc_calcicola]                    |  |  |  |  |
| znt9like_[Nostoc_commune]                      |  |  |  |  |
| znt9like_[Nostoc_piscinale]                    |  |  |  |  |

```

-----EL-----SINN-----ENV-----
QNTKLVDPTL DLEIAA V LA ETAPGSHH
EAGSNA
SDGSHH
S
S

```

|                                                                         |       |       |            |        |       |       |       |         |       |
|-------------------------------------------------------------------------|-------|-------|------------|--------|-------|-------|-------|---------|-------|
| znt9like_[Nostoc_cycadae]                                               | ----- | ----- | -----      | -----  | ----- |       |       |         |       |
| znt9like_[Myxosarcina_sp._GI1]                                          | ----- | ----- | -----      | -----  | ----- |       |       |         |       |
| znt9like_[Chondrocystis_sp._NIES-4102]                                  | ----- | ----- | -----      | -----  | ----- |       |       |         |       |
| znt9like_[Pleurocapsa_sp._PCC_7319]                                     | ----- | ----- | -----      | -----  | ----- |       |       |         |       |
| znt33D_[Drosophila_melanogaster]                                        | ----- | ----- | -----      | -----  | ----- |       |       |         |       |
| transporter_[Pleurocapsa_sp._PCC_7319]                                  | ----- | ----- | -----      | -----  | ----- |       |       |         |       |
| transporter_[Leptolyngbya_foveolarum]                                   | ----- | ----- | -----      | -----  | ----- |       |       |         |       |
| transporter_[Myxosarcina_sp._GI1]                                       | ----- | ----- | -----      | -----  | ----- |       |       |         |       |
| transporter_[Chondrocystis_sp._NIES-4102]                               | ----- | ----- | -----      | -----  | ----- |       |       |         |       |
| transporter_[Phormidesmis_priestleyi]                                   | ----- | ----- | -----      | -----  | ----- |       |       |         |       |
| transporter_[Nostoc_piscinale]                                          | ----- | ----- | -----      | -----  | ----- |       |       |         |       |
| transporter_[Nosdoc_punctiforme]                                        | ----- | ----- | -----      | -----  | ----- |       |       |         |       |
| transporter_[Nostoc_caldicola]                                          | ----- | ----- | -----      | -----  | ----- |       |       |         |       |
| cationtransporter3_[Firmicutes_bacterium]                               | ----- | ----- | -----      | -----  | ----- |       |       |         |       |
| c.e.p_[Firmicutes_bacterium]                                            | ----- | ----- | -----      | -----  | ----- |       |       |         |       |
| cationtransporter1_[Firmicutes_bacterium]                               | ----- | ----- | -----      | -----  | ----- |       |       |         |       |
| cationtransporter2_[Firmicutes_bacterium]                               | ----- | ----- | -----      | -----  | ----- |       |       |         |       |
| cationtransporter1_[Actinobacteria_bacterium]                           | ----- | ----- | -----      | -----  | ----- |       |       |         |       |
| cationtransporter2_[Actinobacteria_bacterium]                           | ----- | ----- | -----      | -----  | ----- |       |       |         |       |
| c.e.p_[Candidatus_Woeseearchaeota_archaeon_CG08_land_8_20_14_0_20_43_7] | ----- | ----- | -----      | -----  | ----- |       |       |         |       |
| transporter_[E.Coli]                                                    | ----- | ----- | -----      | -----  | ----- |       |       |         |       |
| znt9-like2_[Candidatus_Micrarchaeota_archaeon]                          | ----- | ----- | -----      | -----  | ----- |       |       |         |       |
| znt9-like_[Candidatus_Pacearchaeota_archaeon]                           | ----- | ----- | -----      | -----  | ----- |       |       |         |       |
| znt9-like_[Candidatus_Aenigmarchaeota_archaeon_ex4484_52]               | ----- | ----- | -----      | -----  | ----- |       |       |         |       |
| znt9-like1_[Candidatus_Micrarchaeota_archaeon]                          | ----- | ----- | -----      | -----  | ----- |       |       |         |       |
| znt9-like4_[Candidatus_Micrarchaeota_archaeon]                          | ----- | ----- | -----      | -----  | ----- |       |       |         |       |
| znt9-like_[Candidatus_Woeseearchaeota_archaeon]                         | ----- | ----- | -----      | -----  | ----- |       |       |         |       |
| znt7_[Drosophila_melanogaster]                                          | ----- | ----- | -----      | -----  | ----- |       |       |         |       |
| znt7_[Danio_rerio]                                                      | ----- | ----- | -----      | DQHCHD | D     |       |       |         |       |
| znt7_human                                                              | ----- | ----- | -----      | HFHSHD | G     |       |       |         |       |
| znt7_[Mus_musculus]                                                     | ----- | ----- | -----      | HLHSHD | G     |       |       |         |       |
| znt7_[Rattus_norvegicus]                                                | ----- | ----- | -----      | HLHSHD | G     |       |       |         |       |
| znt5-like_[Ciona_intestinalis]                                          | ----- | ----- | -----      | HENCHS | ----- |       |       |         |       |
| znt5_[Danio_rerio]                                                      | ----- | ----- | -----      | HGHSHS | ----- |       |       |         |       |
| znt5_human                                                              | ----- | ----- | -----      | HSHGSA | ----- |       |       |         |       |
| znt5_[Mus_musculus]                                                     | ----- | ----- | -----      | HSHGFT | ----- |       |       |         |       |
| znt5_[Rattus_norvegicus]                                                | ----- | ----- | -----      | HSHGFT | ----- |       |       |         |       |
| znt6_[Ciona_intestinalis]                                               | ----- | ----- | -----      | -----  | ----- |       |       |         |       |
| znt6_[Danio_rerio]                                                      | ----- | ----- | -----      | -----  | ----- |       |       |         |       |
| znt6_human                                                              | ----- | ----- | -----      | -----  | ----- |       |       |         |       |
| znt6_[Rattus_norvegicus]                                                | ----- | ----- | -----      | -----  | ----- |       |       |         |       |
| znt6_isoform1_[Mus_musculus]                                            | ----- | ----- | -----      | -----  | ----- |       |       |         |       |
| znt6_isoform2_[Mus_musculus]                                            | ----- | ----- | -----      | -----  | ----- |       |       |         |       |
| znt4_[Danio_rerio]                                                      | ----- | ----- | -----      | -----  | ----- |       |       |         |       |
| cationtransporter1_[Candidatus_Micrarchaeota_archaeon]                  | ----- | ----- | -----      | -----  | ----- |       |       |         |       |
| transporter_[Geopsychrobacter_electrodiphilus]                          | ----- | ----- | -----      | -----  | ----- |       |       |         |       |
| cationtransporter2_[Candidatus_Micrarchaeota_archaeon]                  | ----- | ----- | -----      | -----  | ----- |       |       |         |       |
| znt10_[Danio_rerio]                                                     | ----- | ----- | -----      | -----  | ----- |       |       |         |       |
| znt10_human                                                             | ----- | GTSV  | ERKREK     | GA     | TV    | ----- | FANV  | AGD     | ----- |
| znt10_[Mus_musculus]                                                    | ----- | GSSA  | GRKQQE     | GA     | TV    | ----- | FSNV  | AGD     | ----- |
| znt10_[Rattus_norvegicus]                                               | ----- | GASA  | GRKQQE     | GA     | TV    | ----- | FSNV  | AGD     | ----- |
| znt1-likel1_[Hydra_vulgaris]                                            | ----- | KKNK  | TDEKIK     | -----  | ----- | ----- | ----- | -----   | ----- |
| znt1_[Ciona_intestinalis]                                               | ----- | ----- | -----      | -----  | ----- | ----- | ----- | -----   | ----- |
| znt1a_[Danio_rerio]                                                     | ----- | ANHN  | SPNGVNAERK | AA     | ----- | ----- | D-MC  | HSDSLDL | ----- |
| znt1_human                                                              | ----- | ANTS  | NSNGLKLDPA | DP     | ----- | ----- | ENPR  | SGDTVEV | ----- |



znt1\_[Mus\_musculus]  
znt1\_[Rattus\_norvegicus]  
znt1\_isoformG\_[Drosophila\_melanogaster]  
znt1\_isoformF\_[Drosophila\_melanogaster]  
znt1-like2\_[Hydra\_vulgaris]

```
-----ANTS NSNGLKADQA EP-----EKLRSDDPVDV---  
-----ANTS NSNGLKADQA EP-----EKLRSDDPVDV---  
-----YEK--QKEKAPV-----  
-----YEK--QKEKAPV-----  
-----NNKV NENFSDIPLI DL-----KNGITADTEVV---
```

|                                                |       |          |             |             |             |
|------------------------------------------------|-------|----------|-------------|-------------|-------------|
| znt4_human                                     | ----- | SGCERN   | HGQDSLAVRA  | AFVHALGDLV  | QSVGVLIAAY  |
| znt4_[Rattus_norvegicus]                       | ----- | S-SGHS   | HGQDSLAVRA  | AFVHALGDLV  | QSVGVLIAAY  |
| znt4_isoforma_[Mus_musculus]                   | ----- | S-SGHN   | HGQDSLAVRA  | AFVHALGDLV  | QSVGVLIAAY  |
| znt4_isoformb_[Mus_musculus]                   | ----- | S-SGHN   | HGQDSLAVRA  | AFVHALGDLV  | QSVGVLIAAY  |
| znt8_human                                     | ----- |          | EVQANASVRA  | AFVHALGDLF  | QSIISVLISAL |
| znt8_[Mus_musculus]                            | ----- |          | DVQANASVRA  | AFVHALGDVF  | QSIISVLISAL |
| znt8_[Rattus_norvegicus]                       | ----- |          | DAQANASVRA  | AFVHALGDVF  | QSTSVLISAL  |
| znt3_human                                     | ----- | EGPEEP   | LPLGNTSVRA  | AFVHVLGDLL  | QSFVGLAASI  |
| znt3_[Rattus_norvegicus]                       | ----- | EGHGHP   | LSLGNTSVRA  | AFVHVLGDLL  | QSLGVLAAAI  |
| znt3_isoform1_[Mus_musculus]                   | ----- | EGHGYP   | MSLGNTSVRA  | AFVHVLGDLL  | QSFVGLAASI  |
| znt3_isoform2_[Mus_musculus]                   | ----- | EGHGYP   | MSLGNTSVRA  | AFVHVLGDLL  | QSFVGLAASI  |
| znt2-like_[Hydra_vulgaris]                     | ----- | LLIQKTKS | KVRKDLNVRA  | AFIHALGDLV  | QSIGVFFAAL  |
| znt35C_[Drosophila_melanogaster]               | ----- | HGGPVG   | REAVNMNVRA  | ALIHVIGDVI  | QSVGVFVAAG  |
| znt2_[Ciona_intestinalis]                      | ----- | S---SHD  | EESGNVNVRA  | AFIHVIGDLL  | QSLGVLTAAF  |
| znt8_[Danio_rerio]                             | ----- | DVEEQRPG | KTQANASVRA  | AFVHVLGDLL  | QSIISVLVSAL |
| znt2_[Danio_rerio]                             | ----- |          | GNHGNTSVRA  | AFIHVLGDLL  | QSFVGMVAAI  |
| znt3_isoformX1_[Danio_rerio]                   | ----- |          | GNHGNTSVRA  | AFIHVLGDLL  | QSFVGMVAAI  |
| znt2_human                                     | ----- |          | QQEENPSVRA  | AFIHVIGDFM  | QSMGVLVAAY  |
| znt2_isoform1_[Mus_musculus]                   | ----- |          | -QQQNPSVRA  | AFIHVIGDLL  | QSVGVLVAAAY |
| znt2_isoform2_[Mus_musculus]                   | ----- |          | -QQQNPSVRA  | AFIHVIGDLL  | QSVGVLVAAAY |
| znt2_isoform1_[Rattus_norvegicus]              | ----- |          | QQQQNPSVRA  | AFIHVIGDLL  | QSVGVLVAAAY |
| znt2_isoform2_[Rattus_norvegicus]              | ----- |          | QQQQNPSVRA  | AFIHVIGDLL  | QSVGVLVAAAY |
| znt9-like_[Hydra_vulgaris]                     | ----- |          | EYISRGDPN   | AVAVLLEDGA  | AVLGVLIATA  |
| znt9_[Drosophila_melanogaster]                 | ----- |          | DYVISGKDPC  | VNVVLCEDAA  | AVTGVMVAAA  |
| znt9-like_[Ciona_intestinalis]                 | ----- |          | EYVKESRDPS  | TNVVLEDASA  | AVMGVGIAGS  |
| znt9_[Danio_rerio]                             | ----- |          | EYVMQSRDPS  | TNVVLEDAAA  | AVLGVVLAAG  |
| znt9_human                                     | ----- |          | KYVMESRDPS  | TNVILLEDTA  | AVLGVIIAAT  |
| znt9_[Rattus_norvegicus]                       | ----- |          | KYVMESRDPS  | TNVILLEDTA  | AVLGVMI AAT |
| isoform1_znt9_[Mus_musculus]                   | ----- |          | KYVMESRDPS  | TNVILLEDTA  | AVLGVIIAAT  |
| isoform2_znt9_[Mus_musculus]                   | ----- |          | KYVMESRDPS  | TNVILLEDTA  | AVLGVIIAAT  |
| znt9like_[E.Coli_partial]                      | ----- |          | RFLHESRHSE  | ILVIFAEDFC  | AIIGLMLALG  |
| znt9like_[Rhodanobacter_glycinis]              | ----- |          | RWFRETRSSE  | LLVIFGEDFA  | ALIGLCLATL  |
| znt9like_[Dyella_ginsengisoli]                 | ----- |          | TWFRETRSSE  | LLVIFGEDLA  | ALIGLCLAAL  |
| znt9like2_[Actinobacteria_bacterium]           | ----- |          | NFIRTAKAPE  | LPVVILLEDVG | AETGLVFALF  |
| znt9like_[Firmicutes_bacterium]                | ----- |          | RALAEITDDPV | TMTVILLEDTA | AMIGLVLAAL  |
| znt9-like3_[Candidatus_Micrarchaeota_archaeon] | ----- |          | GAIRESKAPA  | IFIVFLEDTS  | AMIGLFI AFW |
| znt9like_[Mesorhizobium_sp._L2C054A000]        | ----- |          | QAVQSSKDPS  | VYTIILFEDSA | ALLGLFVAFA  |
| znt9like_[Geopsychrobacter_electrodiphilus]    | ----- |          | DAIHRGKDPT  | IFVVLFEDAA  | AMLGLLVAFC  |
| znt9like_[Sneathiella_limimaris]               | ----- |          | SAIQRSKDPT  | IFTVILLEDTA | ALTGLVVAML  |
| znt9like_[Sneathiella_sp]                      | ----- |          | QSVRQSKDPT  | VFTIILFEDTA | AMLGLIAALI  |
| znt9like_[Sneathiella_chungangensis]           | ----- |          | QEVRRHSDPT  | IFTIILFEDTA | AMLGLFAALI  |
| znt9like_[Leptolyngbya_foveolarum]             | ----- |          | KAIGKSKDPS  | SFIVIVEDTA  | ALVGLAIAFA  |
| znt9like_[Massilia_sp._LC238]                  | ----- |          | QAVRASKDAS  | VFTVFIEDSA  | ALLGLAIAVL  |
| znt9like1_[Variovorax_paradoxus]               | ----- |          | QALDRSKDPT  | TYTVLAEDSA  | ALAGLAVAAL  |
| znt9like2_[Variovorax_paradoxus]               | ----- |          | QALDRSKDPT  | TYTVLAEDSA  | ALVGLLVAAAL |
| znt9like_[Nitrosospira_sp._Nsp11]              | ----- |          | QTLRRSYDPS  | VLTVILLEDTA | ALIGLITVAFV |
| znt9like_[Sorangium_cellulosum]                | ----- |          | AAMRSSKDPT  | TFTIVLEDASA | ALAGLAI AFL |
| znt9like1_[Actinobacteria_bacterium]           | ----- |          | QAVRAAKDPS  | LFTVLFEDGA  | AMLGLLVAFA  |
| znt9like_[Phormidismis_priestleyi]             | ----- |          | QAVKASKDPT  | IFTVLFEDSA  | ALLGLLVAFI  |
| znt9like1_[Nosdoc_punctiforme]                 | ----- |          | QAIKNSKDPT  | VFTVLFEDTA  | AAILGLVVALI |
| znt9like2_[Nosdoc_punctiforme]                 | ----- |          | QAIKNSKDPT  | VFTVLFEDTA  | AAILGLLVALI |
| znt9like_[Nostoc_calcicola]                    | ----- |          | QAIKNSKDPT  | VITILFEDTA  | AAILGLFVALI |
| znt9like_[Nostoc_commune]                      | ----- |          | QAIKNSKDPT  | VITILFEDTA  | AAILGLIVALI |
| znt9like_[Nostoc_piscinale]                    | ----- |          | QAIKTSKDPT  | VFTVLFEDSA  | AAILGLLVALL |

|                                                                         |   |   |        |            |             |             |             |             |
|-------------------------------------------------------------------------|---|---|--------|------------|-------------|-------------|-------------|-------------|
| znt9like_[Nostoc_cycadae]                                               |   |   |        | QAIKNSKDPT | VFTILFEDSA  | AALGLIVALI  |             |             |
| znt9like_[Myxosarcina_sp._GI1]                                          |   |   |        | TAVRASKDPT | IFTILFEDSA  | ALVGLIVAFI  |             |             |
| znt9like_[Chondrocystis_sp._NIES-4102]                                  |   |   |        | KAIRTSKDPI | VFTILFEDTA  | ALIGLFFAFI  |             |             |
| znt9like_[Pleurocapsa_sp._PCC_7319]                                     |   |   |        | EAIRASKDPT | IFTILFEDTA  | ALVGLIVAFI  |             |             |
| znt33D_[Drosophila_melanogaster]                                        |   |   |        |            |             |             |             |             |
| transporter_[Pleurocapsa_sp._PCC_7319]                                  |   |   | EAKRGG | DLD-SRLLOA | DAKHTLSDVW  | ITVVLLIGML  |             |             |
| transporter_[Leptolyngbya_foveolarum]                                   |   |   | ERRVGN | RLG-SNILVA | DAQHTMSDIW  | ITIAVMGGGLI |             |             |
| transporter_[Myxosarcina_sp._GI1]                                       |   |   | ERNVGG | KID-SPILIA | DAKHTTSDIW  | VTVVVIAGLI  |             |             |
| transporter_[Chondrocystis_sp._NIES-4102]                               |   |   | ERHIGR | KVN-SPILIA | DAKHTMSDIW  | VTIIVLAGLI  |             |             |
| transporter_[Phormidesmis_priestleyi]                                   |   |   | ERAEGQ | RVG-SPILIA | DAQHTMSDVW  | VTISVLAGLV  |             |             |
| transporter_[Nostoc_piscinale]                                          |   |   | ERRVGG | RVG-SPILIA | DAMHTMSDIW  | VTISVIGGLI  |             |             |
| transporter_[Nosdoc_punctiforme]                                        |   |   | ERAVGK | RVG-SSILIA | DATHTMSDIW  | VTISVIGGLI  |             |             |
| transporter_[Nostoc_calicicola]                                         |   |   | ERGVGK | RVG-SPILIA | DATHTMSDIW  | VTISVIGGLI  |             |             |
| cationtransporter3_[Firmicutes_bacterium]                               |   |   | ERRIGK | LLH-SEILVA | DAVHTQSDIY  | ISIGVLVTLT  |             |             |
| c.e.p_[Firmicutes_bacterium]                                            |   |   | EYNKGG | ALG-SQILVS | DSLHTKSDIY  | VSIGVLGALL  |             |             |
| cationtransporter1_[Firmicutes_bacterium]                               |   |   | EHNKGE | ALN-SQILIS | DSLHTKSDIY  | ISLGVLTLV   |             |             |
| cationtransporter2_[Firmicutes_bacterium]                               |   |   | EHKGGK | ELN-SQILVS | DSMHTSDIY   | ISVGLVTLI   |             |             |
| cationtransporter1_[Actinobacteria_bacterium]                           |   |   | ERGVGK | RLG-SEILVA | DASHTGSDIL  | VSIGVIGLV   |             |             |
| cationtransporter2_[Actinobacteria_bacterium]                           |   |   | ERREGK | KLK-SEILIA | DASHTGSDIL  | VSLGVIASLA  |             |             |
| c.e.p_[Candidatus_Woeseearchaeota_archaeon_CG08_land_8_20_14_0_20_43_7] |   |   | TIKVGD | RWK-SQTIIA | NAWHHRSDSF  | SSIAVLLGVG  |             |             |
| transporter_[E.Coli]                                                    |   |   | MLAVAT | RVK-STMLVA | NAWHARSDAA  | SSLVVAIGII  |             |             |
| znt9-like2_[Candidatus_Micrarchaeota_archaeon]                          |   |   | KIYYGK | KEN-SISLLS | DGVHSRVDVY  | ISIAVMIGLI  |             |             |
| znt9-like_[Candidatus_Pacearchaeota_archaeon]                           |   |   | KIYYGK | KEG-SISLLS | DGIHSRVDVW  | TSIAVLAGLI  |             |             |
| znt9-like_[Candidatus_Aenigmarchaeota_archaeon_ex4484_52]               |   |   | KIRYGG | KEN-SISLVS | DGIHSRIDVY  | MSVAVLFGLY  |             |             |
| znt9-likel_[Candidatus_Micrarchaeota_archaeon]                          |   |   | LHDVSK | KEG-SVALEA | DAYHFTSDLW  | STGAVIAGLV  |             |             |
| znt9-like4_[Candidatus_Micrarchaeota_archaeon]                          |   |   | LGDVAK | KEG-SSALEA | DSAHFTTDVV  | SSAAVLLGLI  |             |             |
| znt9-like_[Candidatus_Woeseearchaeota_archaeon]                         |   |   | LSSTAR | KEGGSHALEA | DSAHFTTDVVL | GSAVAVLVGLI |             |             |
| znt7_[Drosophila_melanogaster]                                          | H | S |        | HGDM       | SGSNSQIMRG  | VFLHILADTL  | GSVGVIIISAV |             |
| znt7_[Danio_rerio]                                                      | H | T |        | LTPG       | KGSSKQILQG  | VFLHIVADTL  | GSVGVIIISAI |             |
| znt7_human                                                              | P | S |        | LKET       | TGPSRQILQG  | VFLHILADTL  | GSIGVIASAI  |             |
| znt7_[Mus_musculus]                                                     | P | S |        | FKAT       | AGPSRQILQG  | VFLHILADTL  | GSIGVIASAI  |             |
| znt7_[Rattus_norvegicus]                                                | P | S |        | FKET       | AGPSRQILQG  | VFLHILADTL  | GSIGVIASAI  |             |
| znt5-like_[Ciona_intestinalis]                                          |   |   |        |            | HSHSNANIKG  | VYLHVLADLL  | GSIGVIISSL  |             |
| znt5_[Danio_rerio]                                                      |   |   |        |            | SGGMNANMRG  | VFLHVLADTL  | GSVGVIIISTI |             |
| znt5_human                                                              |   |   |        |            | GGGMNANMRG  | VFLHVLADTL  | GSIGVIVSTV  |             |
| znt5_[Mus_musculus]                                                     |   |   |        |            | GGGMNANMRG  | VFLHVLADTL  | GSIGVIVSTV  |             |
| znt5_[Rattus_norvegicus]                                                |   |   |        |            | GGGMNANMRG  | VFLHVLADTL  | GSIGVIVSTV  |             |
| znt6_[Ciona_intestinalis]                                               |   |   |        |            | PALSKILLPR  | INPFLLTSFI  | GASLIFLTNL  |             |
| znt6_[Danio_rerio]                                                      |   |   |        |            | PALSSFLLPR  | MNPFVLINLA  | GAFALGITYM  |             |
| znt6_human                                                              |   |   |        |            | PGLSSIFLPR  | MNPFVLIDLA  | GAFALCITYM  |             |
| znt6_[Rattus_norvegicus]                                                |   |   |        |            | PGLSSIFLPR  | MNPFVLIDLA  | GALALCITYM  |             |
| znt6_isoform1_[Mus_musculus]                                            |   |   |        |            | PGLSSIFLPR  | MNPFVLIDLA  | GAFALCITYM  |             |
| znt6_isoform2_[Mus_musculus]                                            |   |   |        |            | PGLSSIFLPR  | MNPFVLIDLA  | GAFALCITYM  |             |
| znt4_[Danio_rerio]                                                      |   |   |        | QGSSGQGO   | RGHGSLAVRA  | AFIHALGDLV  | QSVGVLIAAY  |             |
| cationtransporter1_[Candidatus_Micrarchaeota_archaeon]                  |   |   |        |            | -HEENLNIQS  | AFPHAAGDAL  | SSVGVILAAV  |             |
| transporter_[Geopsychrobacter_electrodiphilus]                          |   |   |        |            | GSKNNLNIRS  | AYLHLLSDAV  | SSIAVILGAL  |             |
| cationtransporter2_[Candidatus_Micrarchaeota_archaeon]                  |   |   |        |            | YKKKNLNMKA  | AYVHMFYDTI  | SSVFVIIISGM |             |
| znt10_[Danio_rerio]                                                     |   |   | ELE    | QV         | ETGLQEEKTE  | KDGAPLNIRG  | VLLHVLNDAL  | GSVVVVVASA  |
| znt10_human                                                             |   |   | SFN    | TQ         | NEPEDMMKKE  | KKSEALNIRG  | VLLHVMGDAL  | GSVVVVITAI  |
| znt10_[Mus_musculus]                                                    |   |   | SLN    | TE         | NEPEETTKKE  | KKSEALNIRG  | VLLHVMGDAL  | GSVVVVITAI  |
| znt10_[Rattus_norvegicus]                                               |   |   | SLN    | TQ         | NEPEETTKKE  | KKSEALNIRG  | VLLHVMGDAL  | GSVIVVVTAI  |
| znt1-likel_[Hydra_vulgaris]                                             |   |   | NES    | VQ         | GKEPTWAAEY  | QSPHTLNIRG  | VYLHILEHFL  | SSLIVIIISAI |
| znt1_[Ciona_intestinalis]                                               |   |   |        |            | --HHAETTNS  | SAEEHMNMKA  | VFLHVLGDAL  | GSVIVMISAT  |
| znt1a_[Danio_rerio]                                                     |   |   | QINGS  | A          | -PYDELENGH  | DAASQLNMRG  | VFLHVLGDAL  | GSVIVVINAI  |
| znt1_human                                                              |   |   | QVNGN  | LV         | REPDMHELEE  | DRAGQLNMRG  | VFLHVLGDAL  | GSVIVVNNAL  |

znt1\_[Mus\_musculus]  
znt1\_[Rattus\_norvegicus]  
znt1\_isoformG\_[Drosophila\_melanogaster]  
znt1\_isoformF\_[Drosophila\_melanogaster]  
znt1-like2\_[Hydra\_vulgaris]

|         |       |            |            |            |             |
|---------|-------|------------|------------|------------|-------------|
| -QVNGN- | -LI   | QESDNLEAED | NRAGQLNMRG | VFLHVLGDAL | GSVIVVNNAL  |
| -QVNGN- | -LI   | QESDSLESED | NRAGQLNMRG | VFLHVLGDAL | GSVIVVNNAL  |
| -----   |       | --KKSSHGHS | HDPGQMNMRG | AFLHVLSDAL | GSIIIVVISAV |
| -----   |       | --KKSSHGHS | HDPGQMNMRG | AFLHVLSDAL | GSIIIVVISAV |
| -QMF-   | ----- | -QTVSAEKKL | TGASQLNMRG | VYLHVLGDAL | GSVIVMVSAL  |

|                                                |        |     |     |     |     |     |
|------------------------------------------------|--------|-----|-----|-----|-----|-----|
| znt4_human                                     | IIRFKP | --- | --- | --- | --- | --- |
| znt4_[Rattus_norvegicus]                       | IIRFKP | --- | --- | --- | --- | --- |
| znt4_isoforma_[Mus_musculus]                   | IIRFKP | --- | --- | --- | --- | --- |
| znt4_isoformb_[Mus_musculus]                   | IIRFKP | --- | --- | --- | --- | --- |
| znt8_human                                     | IIYFKP | --- | --- | --- | --- | --- |
| znt8_[Mus_musculus]                            | IIYFKP | --- | --- | --- | --- | --- |
| znt8_[Rattus_norvegicus]                       | IIYFKP | --- | --- | --- | --- | --- |
| znt3_human                                     | LIYFKP | --- | --- | --- | --- | --- |
| znt3_[Rattus_norvegicus]                       | LIYFKP | --- | --- | --- | --- | --- |
| znt3_isoform1_[Mus_musculus]                   | LIYFKP | --- | --- | --- | --- | --- |
| znt3_isoform2_[Mus_musculus]                   | LIYFKP | --- | --- | --- | --- | --- |
| znt2-like_[Hydra_vulgaris]                     | IIYFKP | --- | --- | --- | --- | --- |
| znt35C_[Drosophila_melanogaster]               | VIYFWP | --- | --- | --- | --- | --- |
| znt2_[Ciona_intestinalis]                      | VIYFKP | --- | --- | --- | --- | --- |
| znt8_[Danio_rerio]                             | IIFFKP | --- | --- | --- | --- | --- |
| znt2_[Danio_rerio]                             | IIYFRP | --- | --- | --- | --- | --- |
| znt3_isoformX1_[Danio_rerio]                   | IIYFRP | --- | --- | --- | --- | --- |
| znt2_human                                     | IIYFKP | --- | --- | --- | --- | --- |
| znt2_isoform1_[Mus_musculus]                   | IIYFKP | --- | --- | --- | --- | --- |
| znt2_isoform2_[Mus_musculus]                   | IIYFKP | --- | --- | --- | --- | --- |
| znt2_isoform1_[Rattus_norvegicus]              | IIYFKP | --- | --- | --- | --- | --- |
| znt2_isoform2_[Rattus_norvegicus]              | IIYFKP | --- | --- | --- | --- | --- |
| znt9-like_[Hydra_vulgaris]                     | SIGLT  | --- | --- | --- | --- | --- |
| znt9_[Drosophila_melanogaster]                 | CMGLS  | --- | --- | --- | --- | --- |
| znt9-like_[Ciona_intestinalis]                 | AIALT  | --- | --- | --- | --- | --- |
| znt9_[Danio_rerio]                             | CMGLT  | --- | --- | --- | --- | --- |
| znt9_human                                     | CMGLT  | --- | --- | --- | --- | --- |
| znt9_[Rattus_norvegicus]                       | CMGLT  | --- | --- | --- | --- | --- |
| isoform1_znt9_[Mus_musculus]                   | CMGLT  | --- | --- | --- | --- | --- |
| isoform2_znt9_[Mus_musculus]                   | CMGLT  | --- | --- | --- | --- | --- |
| znt9like_[E.Coli_partial]                      | GTVLT  | --- | --- | --- | --- | --- |
| znt9like_[Rhodanobacter_glycinis]              | AVGAT  | --- | --- | --- | --- | --- |
| znt9like_[Dyella_ginsengisoli]                 | AVGAT  | --- | --- | --- | --- | --- |
| znt9like2_[Actinobacteria_bacterium]           | GLTMS  | --- | --- | --- | --- | --- |
| znt9like_[Firmicutes_bacterium]                | LLALA  | --- | --- | --- | --- | --- |
| znt9-like3_[Candidatus_Micrarchaeota_archaeon] | GILLS  | --- | --- | --- | --- | --- |
| znt9like_[Mesorhizobium_sp._L2C054A000]        | GILAA  | --- | --- | --- | --- | --- |
| znt9like_[Geopsychrobacter_electrodiphilus]    | GVVFS  | --- | --- | --- | --- | --- |
| znt9like_[Sneathiella_limimaris]               | GIYLS  | --- | --- | --- | --- | --- |
| znt9like_[Sneathiella_sp]                      | GIFLA  | --- | --- | --- | --- | --- |
| znt9like_[Sneathiella_chungangensis]           | GIFFA  | --- | --- | --- | --- | --- |
| znt9like_[Leptolyngbya_foveolarum]             | GIWLS  | --- | --- | --- | --- | --- |
| znt9like_[Massilia_sp._LC238]                  | GIALG  | --- | --- | --- | --- | --- |
| znt9like1_[Variovorax_paradoxus]               | GIYLG  | --- | --- | --- | --- | --- |
| znt9like2_[Variovorax_paradoxus]               | GIYLG  | --- | --- | --- | --- | --- |
| znt9like_[Nitrosospira_sp._Nsp11]              | GVYLA  | --- | --- | --- | --- | --- |
| znt9like_[Sorangium_cellulosum]                | GVWLG  | --- | --- | --- | --- | --- |
| znt9like1_[Actinobacteria_bacterium]           | GVVFG  | --- | --- | --- | --- | --- |
| znt9like_[Phormidesmis_priestleyi]             | GVFLG  | --- | --- | --- | --- | --- |
| znt9like1_[Nosdoc_punctiforme]                 | GIFLG  | --- | --- | --- | --- | --- |
| znt9like2_[Nosdoc_punctiforme]                 | GIFLG  | --- | --- | --- | --- | --- |
| znt9like_[Nostoc_calcicola]                    | GIFLG  | --- | --- | --- | --- | --- |
| znt9like_[Nostoc_commune]                      | GIFLG  | --- | --- | --- | --- | --- |
| znt9like_[Nostoc_piscinale]                    | GIFLG  | --- | --- | --- | --- | --- |

|                                                                        |            |            |            |            |            |            |
|------------------------------------------------------------------------|------------|------------|------------|------------|------------|------------|
| znt9like_[Nostoc_cycadae]                                              | GIFLG      | ----       | -----      | -----      | -----      | -----      |
| znt9like_[Myxosarcina_sp._GI1]                                         | GVLSG      | ----       | -----      | -----      | -----      | -----      |
| znt9like_[Chondrocystis_sp._NIES-4102]                                 | GVLSG      | ----       | -----      | -----      | -----      | -----      |
| znt9like_[Pleurocapsa_sp._PCC_7319]                                    | GVFSG      | ----       | -----      | -----      | -----      | -----      |
| znt33D_[Drosophila_melanogaster]                                       | ----       | ----       | -----      | -----      | -----      | -----      |
| transporter_[Pleurocapsa_sp._PCC_7319]                                 | GVRL       | ----       | -----      | -----      | -----      | -----      |
| transporter_[Leptolyngbya_foveolarum]                                  | GVVV       | ----       | -----      | -----      | -----      | -----      |
| transporter_[Myxosarcina_sp._GI1]                                      | GVWQASA    | ----       | -----      | -----      | L          | -----      |
| transporter_[Chondrocystis_sp._NIES-4102]                              | GVWQAEI    | ----       | -----      | -----      | L          | -----      |
| transporter_[Phormidesmis_priestleyi]                                  | GVWAF      | ----       | -----      | -----      | -----      | -----      |
| transporter_[Nostoc_piscinale]                                         | GVWL       | ----       | -----      | -----      | -----      | -----      |
| transporter_[Nostoc_punctiforme]                                       | GVWL       | ----       | -----      | -----      | -----      | -----      |
| transporter_[Nostoc_caldicola]                                         | GVWL       | ----       | -----      | -----      | -----      | -----      |
| cationtransporter3_[Firmicutes_bacterium]                              | GIKL       | ----       | -----      | -----      | -----      | -----      |
| c.e.p_[Firmicutes_bacterium]                                           | GIKL       | ----       | -----      | -----      | -----      | -----      |
| cationtransporter1_[Firmicutes_bacterium]                              | GVKM       | ----       | -----      | -----      | -----      | -----      |
| cationtransporter2_[Firmicutes_bacterium]                              | CIKL       | ----       | -----      | -----      | -----      | -----      |
| cationtransporter1_[Actinobacteria_bacterium]                          | FVKL       | ----       | -----      | -----      | -----      | -----      |
| cationtransporter2_[Actinobacteria_bacterium]                          | LVRM       | ----       | -----      | -----      | -----      | -----      |
| c.e.p_[Candidatus_Woesearchaeota_archaeon_CG08_land_8_20_14_0_20_43_7] | AAYF       | ----       | -----      | -----      | -----      | -----      |
| transporter_[E.Coli]                                                   | GNLS       | ----       | -----      | -----      | -----      | -----      |
| znt9-like2_[Candidatus_Micrarchaeota_archaeon]                         | LSSY       | ----       | -----      | -----      | -----      | -----      |
| znt9-like_[Candidatus_Pacearchaeota_archaeon]                          | LTKF       | ----       | -----      | -----      | -----      | -----      |
| znt9-like_[Candidatus_Aenigmarchaeota_archaeon_ex4484_52]              | LSKY       | ----       | -----      | -----      | -----      | -----      |
| znt9-like1_[Candidatus_Micrarchaeota_archaeon]                         | FASI       | ----       | -----      | -----      | -----      | -----      |
| znt9-like4_[Candidatus_Micrarchaeota_archaeon]                         | AVKL       | ----       | -----      | -----      | -----      | -----      |
| znt9-like_[Candidatus_Woesearchaeota_archaeon]                         | LVEL       | ----       | -----      | -----      | -----      | -----      |
| znt7_[Drosophila_melanogaster]                                         | LMHMF      | ----       | -----      | -----      | -----      | -----      |
| znt7_[Danio_rerio]                                                     | LMQKY      | ----       | -----      | -----      | -----      | -----      |
| znt7_human                                                             | MMQNF      | ----       | -----      | -----      | -----      | -----      |
| znt7_[Mus_musculus]                                                    | MMQNF      | ----       | -----      | -----      | -----      | -----      |
| znt7_[Rattus_norvegicus]                                               | MMQNF      | ----       | -----      | -----      | -----      | -----      |
| znt5-like_[Ciona_intestinalis]                                         | MVSKW      | ----       | -----      | -----      | -----      | -----      |
| znt5_[Danio_rerio]                                                     | LIRQF      | ----       | -----      | -----      | -----      | -----      |
| znt5_human                                                             | LIEQF      | ----       | -----      | -----      | -----      | -----      |
| znt5_[Mus_musculus]                                                    | LIEQF      | ----       | -----      | -----      | -----      | -----      |
| znt5_[Rattus_norvegicus]                                               | LIEQF      | ----       | -----      | -----      | -----      | -----      |
| znt6_[Ciona_intestinalis]                                              | LIQMN      | ----       | -----      | -----      | -----      | -----      |
| znt6_[Danio_rerio]                                                     | LIEIN      | ----       | -----      | -----      | -----      | -----      |
| znt6_human                                                             | LIEIN      | ----       | -----      | -----      | -----      | -----      |
| znt6_[Rattus_norvegicus]                                               | LIEIN      | ----       | -----      | -----      | -----      | -----      |
| znt6_isoform1_[Mus_musculus]                                           | LIEIN      | ----       | -----      | -----      | -----      | -----      |
| znt6_isoform2_[Mus_musculus]                                           | LIEIN      | ----       | -----      | -----      | -----      | -----      |
| znt4_[Danio_rerio]                                                     | IVRFKHIPDH | QRHRHHPAGG | CTASHGRVGH | OSRAAEAAAC | GVCGGAEAVG | -----      |
| cationtransporter1_[Candidatus_Micrarchaeota_archaeon]                 | LIFFT      | ----       | -----      | -----      | -----      | -----      |
| transporter_[Geopsychrobacter_electrodiphilus]                         | AIKLF      | ----       | -----      | -----      | -----      | -----      |
| cationtransporter2_[Candidatus_Micrarchaeota_archaeon]                 | LIIFT      | ----       | -----      | -----      | -----      | -----      |
| znt10_[Danio_rerio]                                                    | LFYVWPLEP  | ----       | -----      | -----      | -----      | D          |
| znt10_human                                                            | IFYVLPLKS  | ----       | -----      | -----      | -----      | E          |
| znt10_[Mus_musculus]                                                   | IFYVQPLRR  | ----       | -----      | -----      | -----      | E          |
| znt10_[Rattus_norvegicus]                                              | IFYVRPLRH  | ----       | -----      | -----      | -----      | E          |
| znt1-likel_[Hydra_vulgaris]                                            | FVIYF      | ----       | -----      | -----      | -----      | -----      |
| znt1_[Ciona_intestinalis]                                              | LIYLVP     | ----       | -----      | YEE        | KIMVAT     | GNATAANVVT |
| znt1a_[Danio_rerio]                                                    | IFVFWKPC   | PGTI       | CENP       | CSGQHCAD   | HALNIS     | SPLTNGTLIK |
| znt1_human                                                             | VFYFSWKGCS | EGDF       | CVNP       | CFPDCKA    | FVEIIN     | S--THASVYE |

znt1\_[Mus\_musculus]  
znt1\_[Rattus\_norvegicus]  
znt1\_isoformG\_[Drosophila\_melanogaster]  
znt1\_isoformF\_[Drosophila\_melanogaster]  
znt1-like2\_[Hydra\_vulgaris]

|            |            |           |       |        |       |         |
|------------|------------|-----------|-------|--------|-------|---------|
| VFYFNWKGCT | EDDF--CTNP | CFDPCKS-- | ---   | SVEIIN | S--   | TQAPMRD |
| VFYFSWKGCT | EDDF--CVNP | CFDPCKS-- | ---   | SVELMN | S--   | TQAPMHE |
| VVWKT----- | -----      | -----     | ----- | -----  | ----- | -----   |
| VVWKT----- | -----      | -----     | ----- | -----  | ----- | -----   |
| IIIV-----  | -----      | -----     | ----- | -----  | ----- | -----   |





|                                                                         |         |         |             |                         |                         |                          |       |
|-------------------------------------------------------------------------|---------|---------|-------------|-------------------------|-------------------------|--------------------------|-------|
| znt9like_[Nostoc_cycadae]                                               | -HLFNNV | -YF     | DGIASIIIIGI | ILAVVAVLLA              | RESKGLLVGE              | SAN                      | ----- |
| znt9like_[Myxosarcina_sp._GI1]                                          | -HLLNNV | -YL     | DGVASIAIGI  | ILAGVAILLA              | YESKGLLIGE              | GAD                      | ----- |
| znt9like_[Chondrocystis_sp._NIES-4102]                                  | -HLLGNI | -YL     | DGVASIVIGV  | ILCGVALLLA              | AESKGLLIGE              | GAD                      | ----- |
| znt9like_[Pleurocapsa_sp._PCC_7319]                                     | -HLLGNV | -YL     | DGVASIIIIGI | ILCGVALLLA              | AESKGLLIGE              | GAN                      | ----- |
| znt33D_[Drosophila_melanogaster]                                        |         |         |             |                         |                         |                          | ----- |
| transporter_[Pleurocapsa_sp._PCC_7319]                                  | ----    | GLL     | -WL         | DVVLAFMVG               | LIFWSAWEVI              | SENIPFLSDR               | --V   |
| transporter_[Leptolyngbya_foveolarum]                                   | ----    | GQD     | -WL         | DVALAFPVAL              | LVI <del>R</del> SGWTVL | SANLPWL <del>V</del> DE  | --M   |
| transporter_[Myxosarcina_sp._GI1]                                       | ----    | NIPQLR  | -SL         | DVILAFPVAF              | MVFYSGWEVI              | RDNLPWL <del>V</del> DE  | --M   |
| transporter_[Chondrocystis_sp._NIES-4102]                               | ----    | NFPQLL  | -WL         | DVILAFPVAL              | LVFQSGWEVI              | NENLPWL <del>V</del> DQ  | --M   |
| transporter_[Phormidesmis_priestleyi]                                   | ----    | NWQ     | -WL         | DLAL <del>S</del> FVAL  | MVFSSGWSVL              | KQNL <del>P</del> SLVDE  | --M   |
| transporter_[Nostoc_piscinale]                                          | ----    | GYQ     | -WL         | DIVLAFPVGL              | LVFWSGWSVL              | QANLPWL <del>V</del> DQ  | --M   |
| transporter_[Nosdoc_punctiforme]                                        | ----    | GYQ     | -WM         | DLVLAFPVAL              | LVFWSGWSVL              | KENLPWL <del>V</del> DQ  | --M   |
| transporter_[Nostoc_calvicola]                                          | ----    | GYQ     | -WM         | DIVLAFPVAL              | LVFWSGWSVL              | KENLPWL <del>V</del> DQ  | --M   |
| cationtransporter3_[Firmicutes_bacterium]                               | ----    | GLPAVI  |             | DPLISIAVAG              | FIFRAALEIF              | LPTCEILADR               | --A   |
| c.e.p_[Firmicutes_bacterium]                                            | ----    | GMPPVI  |             | DPIASLIVSG              | FIIYAAYGIF              | KDTSGVLVDR               | --A   |
| cationtransporter1_[Firmicutes_bacterium]                               | ----    | GLPPII  |             | DPLVSLVVAG              | FILFAAYQIL              | CDNGDILLDR               | --A   |
| cationtransporter2_[Firmicutes_bacterium]                               | ----    | GLPPVI  |             | DPVVSLLVAG              | FIIYAACEII              | RDNGGVLLDQ               | --A   |
| cationtransporter1_[Actinobacteria_bacterium]                           | ----    | GFP     | -IA         | DPLIGLMVAG              | FIVFAAWSVF              | KSANETLADR               | --A   |
| cationtransporter2_[Actinobacteria_bacterium]                           | ----    | GFE     | -KA         | DPVVALLVAG              | AIVYTAWGVF              | KQASATLSDS               | --A   |
| c.e.p_[Candidatus_Woeseearchaeota_archaeon	CG08_land_8_20_14_0_20_43_7] | ----    | IPSLG   | -IL         | DAYASILVSF              | LILKIGMNTM              | ISGFKETVDT               | APS   |
| transporter_[E.Coli]                                                    | ----    | GFK     | -LL         | DPVAAMVVG               | IVTRMGYSFM              | SDSLHDLMDR               | SVD   |
| znt9-like2_[Candidatus_Micrarchaeota_archaeon]                          | ----    | WV      | -YF         | DSLAAALLIGL             | FIIKESVSLG              | KEATDSL <del>L</del> LDV | SAG   |
| znt9-like_[Candidatus_Pacearchaeota_archaeon]                           | ----    | WV      | -YA         | DSL <del>L</del> AFLIGL | YILKESFSLG              | KEATDSL <del>L</del> LDV | SAG   |
| znt9-like_[Candidatus_Aenigmarchaeota_archaeon_ex4484_52]               | ----    | WI      | -YV         | DSLIALLIGI              | YIIKESISLG              | KQATDSL <del>L</del> LDV | SAG   |
| znt9-likel_[Candidatus_Micrarchaeota_archaeon]                          | ----    | GMP     | -WA         | DSVAALLVSL              | LMIKLSFSLG              | MKALNVL <del>L</del> DK  | GAS   |
| znt9-like4_[Candidatus_Micrarchaeota_archaeon]                          | ----    | GFP     | -QG         | DPLAAAVVGL              | VMLYISVELL              | LHSFFVFMDF               | SPD   |
| znt9-like_[Candidatus_Woeseearchaeota_archaeon]                         | ----    | GLA     | -RG         | DALAA <del>F</del> VVGL | LMAYISARLT              | LEAF <del>R</del> VFLDH  | SPS   |
| znt7_[Drosophila_melanogaster]                                          | ----    | GWM     | -IA         | DPICSI <del>F</del> IAL | LIALSVLSLI              | KESIMILMQR               | QPA   |
| znt7_[Danio_rerio]                                                      | ----    | DLM     | -IA         | DPICSM <del>L</del> IAL | LIGVSVVPLL              | RESIGILMQR               | TPP   |
| znt7_human                                                              | ----    | GLM     | -IA         | DPICSI <del>L</del> IAI | LIVSVIPLL               | RESVGI <del>L</del> MQR  | TPP   |
| znt7_[Mus_musculus]                                                     | ----    | GLM     | -IA         | DPICSI <del>L</del> IAI | LIVSVIPLL               | RESVGI <del>L</del> MQR  | TPP   |
| znt7_[Rattus_norvegicus]                                                | ----    | GLM     | -IA         | DPICSI <del>L</del> IAI | LIVSVIPLL               | RESIGILMQR               | TPP   |
| znt5-like_[Ciona_intestinalis]                                          | ----    | QLL     | -IA         | DPICTLAVAS              | LILCTVWPLL              | RDSARVLALC               | APP   |
| znt5_[Danio_rerio]                                                      | ----    | GWL     | -IA         | DPICSLFIST              | LIFLSVIPLL              | KDACEV <del>L</del> LLR  | MPP   |
| znt5_human                                                              | ----    | GWF     | -IA         | DPLCSLFIAI              | LIFLSV <del>V</del> PLI | KDACQV <del>L</del> LLR  | LPP   |
| znt5_[Mus_musculus]                                                     | ----    | GWF     | -IA         | DPLCSLFIAV              | LIFLSVIPLI              | KDACQV <del>L</del> LLR  | LPP   |
| znt5_[Rattus_norvegicus]                                                | ----    | GWF     | -IA         | DPLCSLFIAV              | LIFLSVIPLI              | KDACQV <del>L</del> LLR  | LPP   |
| znt6_[Ciona_intestinalis]                                               | ----    | LYY     | -FA         | DTVSAILIST              | CTLCTMWPVA              | SCSARVLLNT               | TPP   |
| znt6_[Danio_rerio]                                                      | ----    | NYN     | -AM         | DTASAVAIAL              | MTFGTMYPMS              | VYSGKVLLQT               | TPS   |
| znt6_human                                                              | ----    | NYF     | -AV         | DTASAI <del>A</del> IAL | MTFGTMYPMS              | VYSGKVLLQT               | TPP   |
| znt6_[Rattus_norvegicus]                                                | ----    | NYF     | -AV         | DTASAI <del>A</del> IAL | MTFGTMYPMS              | VYSGKVLLQT               | TPP   |
| znt6_isoform1_[Mus_musculus]                                            | ----    | NYF     | -AV         | DTASAI <del>A</del> IAL | MTFGTMYPMS              | VYSGKVLLQT               | TPP   |
| znt6_isoform2_[Mus_musculus]                                            | ----    | NYF     | -AV         | DTASAI <del>A</del> IAL | MTFGTMYPMS              | VYSGKVLLQT               | TPP   |
| znt4_[Danio_rerio]                                                      |         | ADGR    |             |                         |                         |                          | ----- |
| cationtransporter1_[Candidatus_Micrarchaeota_archaeon]                  | ----    | GQY     | -LI         | DIAVSLLIAG              | IILFSAYTVL              | RNSLSILLES               | APH   |
| transporter_[Geopsychrobacter_electrodiphilus]                          | ----    | GLT     | -WI         | DPLLSIVIAI              | YVGWESW <del>K</del> II | QTAVDVLMLK               | VPG   |
| cationtransporter2_[Candidatus_Micrarchaeota_archaeon]                  | ----    | NVV     | -IF         | DLIASIVIAL              | MIFWSGFDII              | RKSVHIFMQG               | VPE   |
| znt10_[Danio_rerio]                                                     |         | QPCNWQC | -YV         | DPSLTLVMVI              | IILSSAAPLL              | KETTTILLQM               | SPE   |
| znt10_human                                                             |         | DPCNWQC | -YI         | DPSLTLVMVI              | IILSSAFPLI              | KETAAILLQM               | VPK   |
| znt10_[Mus_musculus]                                                    |         | DPCNWQC | -YI         | DPSLTVVMVI              | IILSSAFPLI              | KETAVILLQM               | VPK   |
| znt10_[Rattus_norvegicus]                                               |         | DPCNWQC | -YI         | DPSLTVVMVI              | IILSSAFPLI              | KETAAILLQM               | VPK   |
| znt1-likel_[Hydra_vulgaris]                                             |         | KHSFTK  | -YI         | DPIFTVMLVF              | LILHSTIPLF              | RETLILFMQS               | VPA   |
| znt1_[Ciona_intestinalis]                                               |         | NVNQWIM | -YI         | DPAMSVFLVL              | IMITTTYPLF              | KQSSVLLLQT               | VPK   |
| znt1a_[Danio_rerio]                                                     |         | AGPCWVL | -YL         | DPTLCIIMVC              | ILLYTTYPLL              | KESALILLQT               | VPK   |
| znt1_human                                                              |         | AGPCWVL | -YL         | DPTLCVVMVC              | ILLYTTYPLL              | KESALILLQT               | VPK   |

znt1\_[Mus\_musculus]  
znt1\_[Rattus\_norvegicus]  
znt1\_isoformG\_[Drosophila\_melanogaster]  
znt1\_isoformF\_[Drosophila\_melanogaster]  
znt1-like2\_[Hydra\_vulgaris]

|         |    |            |            |            |     |       |
|---------|----|------------|------------|------------|-----|-------|
| AGPCWVL | YL | DPTLCIIMVC | ILLYTTYPLL | KESALILLQT | VPK | ----- |
| AGPCWVL | YL | DPTLCIIMVC | ILLYTTYPLL | KESALILLQT | VPK | ----- |
| -EWKYRY | YM | DPALSIVLVV | LILHSVWPLL | RESALILLQT | VPT | ----- |
| -EWKYRY | YM | DPALSIVLVV | LILHSVWPLL | RESALILLQT | VPT | ----- |
| -NGKWTN | YV | DPGMSIIMVM | IILKTSIPLL | KESSLILMQT | VPT | ----- |

|                                                |       |       |       |       |       |            |
|------------------------------------------------|-------|-------|-------|-------|-------|------------|
| znt4_human                                     | ----- | ----- | ----- | ----- | HL    | NVDYIKEAL  |
| znt4_[Rattus_norvegicus]                       | ----- | ----- | ----- | ----- | HL    | NVDYIKESL  |
| znt4_isoforma_[Mus_musculus]                   | ----- | ----- | ----- | ----- | HL    | NVDYIKESL  |
| znt4_isoformb_[Mus_musculus]                   | ----- | ----- | ----- | ----- | HL    | NVDYIKESL  |
| znt8_human                                     | ----- | ----- | ----- | ----- | SL    | NYSGVKELI  |
| znt8_[Mus_musculus]                            | ----- | ----- | ----- | ----- | GL    | SYNSVKEII  |
| znt8_[Rattus_norvegicus]                       | ----- | ----- | ----- | ----- | GL    | SYNSVKELL  |
| znt3_human                                     | ----- | ----- | ----- | ----- | NV    | GFEPVRDTL  |
| znt3_[Rattus_norvegicus]                       | ----- | ----- | ----- | ----- | SV    | EFEPVRDTL  |
| znt3_isoform1_[Mus_musculus]                   | ----- | ----- | ----- | ----- | SV    | EFEPVRDTL  |
| znt3_isoform2_[Mus_musculus]                   | ----- | ----- | ----- | ----- | SV    | EFEPVRDTL  |
| znt2-like_[Hydra_vulgaris]                     | ----- | ----- | ----- | ----- | GL    | DFKEVFEDL  |
| znt35C_[Drosophila_melanogaster]               | ----- | ----- | ----- | ----- | YM    | HYAEVLQIF  |
| znt2_[Ciona_intestinalis]                      | ----- | ----- | ----- | ----- | GV    | EYSVLKEKL  |
| znt8_[Danio_rerio]                             | ----- | ----- | ----- | ----- | GV    | NYNEVRQLL  |
| znt2_[Danio_rerio]                             | ----- | ----- | ----- | ----- | GI    | QFNSVKEVL  |
| znt3_isoformX1_[Danio_rerio]                   | ----- | ----- | ----- | ----- | GI    | QFNSVKEVL  |
| znt2_human                                     | ----- | ----- | ----- | ----- | GV    | DFTAVRDLL  |
| znt2_isoform1_[Mus_musculus]                   | ----- | ----- | ----- | ----- | GV    | DFTTVKNLL  |
| znt2_isoform2_[Mus_musculus]                   | ----- | ----- | ----- | ----- | GV    | DFTTVKNLL  |
| znt2_isoform1_[Rattus_norvegicus]              | ----- | ----- | ----- | ----- | GV    | DFTTVKNLL  |
| znt2_isoform2_[Rattus_norvegicus]              | ----- | ----- | ----- | ----- | GV    | DFTTVKNLL  |
| znt9-like_[Hydra_vulgaris]                     | ----- | ----- | ----- | ----- | P     | DRLRQIINIL |
| znt9_[Drosophila_melanogaster]                 | ----- | ----- | ----- | ----- | S     | ERLEKINSAL |
| znt9-like_[Ciona_intestinalis]                 | ----- | ----- | ----- | ----- | P     | SRLEELQEML |
| znt9_[Danio_rerio]                             | ----- | ----- | ----- | ----- | A     | EHMQKLTEFL |
| znt9_human                                     | ----- | ----- | ----- | ----- | P     | EQVQRLTELL |
| znt9_[Rattus_norvegicus]                       | ----- | ----- | ----- | ----- | P     | EQVQRLTELL |
| isoform1_znt9_[Mus_musculus]                   | ----- | ----- | ----- | ----- | P     | EQVQRLTELL |
| isoform2_znt9_[Mus_musculus]                   | ----- | ----- | ----- | ----- | P     | EQVQRLTELL |
| znt9like_[E.Coli_partial]                      | ----- | ----- | ----- | ----- | ----- | -----      |
| znt9like_[Rhodanobacter_glycinis]              | ----- | ----- | ----- | ----- | P     | ARRAELHAFL |
| znt9like_[Dyella_ginsengisoli]                 | ----- | ----- | ----- | ----- | P     | RRRAEMLTFL |
| znt9like2_[Actinobacteria_bacterium]           | ----- | ----- | ----- | ----- | D     | EDLVAVKVAL |
| znt9like_[Firmicutes_bacterium]                | ----- | ----- | ----- | ----- | P     | EETAETIRRV |
| znt9-like3_[Candidatus_Micrarchaeota_archaeon] | ----- | ----- | ----- | ----- | K     | EDLQKVRKAI |
| znt9like_[Mesorhizobium_sp._L2C054A000]        | ----- | ----- | ----- | ----- | P     | EVQAKVLAIA |
| znt9like_[Geopsychrobacter_electrodiphilus]    | ----- | ----- | ----- | ----- | V     | EVVAGIRKLV |
| znt9like_[Sneathiella_limimaris]               | ----- | ----- | ----- | ----- | K     | ETROSLEEIV |
| znt9like_[Sneathiella_sp]                      | ----- | ----- | ----- | ----- | P     | VVREGVRAIV |
| znt9like_[Sneathiella_chungangensis]           | ----- | ----- | ----- | ----- | R     | AVTEGITTIM |
| znt9like_[Leptolyngbya_foveolarum]             | ----- | ----- | ----- | ----- | P     | ATRASIRNIV |
| znt9like_[Massilia_sp._LC238]                  | ----- | ----- | ----- | ----- | R     | DOLAALYALF |
| znt9like1_[Variovorax_paradoxus]               | ----- | ----- | ----- | ----- | P     | ETARAIRELA |
| znt9like2_[Variovorax_paradoxus]               | ----- | ----- | ----- | ----- | P     | ETARAIRAIA |
| znt9like_[Nitrosospira_sp._Nsp11]              | ----- | ----- | ----- | ----- | P     | EVVASVTTLA |
| znt9like_[Sorangium_cellulosum]                | ----- | ----- | ----- | ----- | R     | ELLAAIRALA |
| znt9like1_[Actinobacteria_bacterium]           | ----- | ----- | ----- | ----- | P     | EMLAEIKRIA |
| znt9like_[Phormidesmis_priestleyi]             | ----- | ----- | ----- | ----- | A     | ATVKQLRSLV |
| znt9like1_[Nosdoc_punctiforme]                 | ----- | ----- | ----- | ----- | P     | QTIANIRSLS |
| znt9like2_[Nosdoc_punctiforme]                 | ----- | ----- | ----- | ----- | P     | QTIANIRSLS |
| znt9like_[Nostoc_calcicola]                    | ----- | ----- | ----- | ----- | P     | QTIANIRYLS |
| znt9like_[Nostoc_commune]                      | ----- | ----- | ----- | ----- | P     | QTIANIRSLS |
| znt9like_[Nostoc_piscinale]                    | ----- | ----- | ----- | ----- | P     | QTIANIRSLS |

|                                                                         |       |       |       |        |             |
|-------------------------------------------------------------------------|-------|-------|-------|--------|-------------|
| znt9like_[Nostoc_cycadae]                                               | ----- | ----- | ----- | P      | QTVANIRSLS  |
| znt9like_[Myxosarcina_sp._GI1]                                          | ----- | ----- | ----- | A      | KTVADIRSLT  |
| znt9like_[Chondrocystis_sp._NIES-4102]                                  | ----- | ----- | ----- | P      | EIVANIRKIT  |
| znt9like_[Pleurocapsa_sp._PCC_7319]                                     | ----- | ----- | ----- | A      | ETVASIRKIT  |
| znt33D_[Drosophila_melanogaster]                                        | ----- | ----- | ----- |        |             |
| transporter_[Pleurocapsa_sp._PCC_7319]                                  | ----- | ----- | ----- | AIPAKE | ---IMDIV--- |
| transporter_[Leptolyngbya_foveolarum]                                   | ----- | ----- | ----- | AIAPEA | ---IHAAV--- |
| transporter_[Myxosarcina_sp._GI1]                                       | ----- | ----- | ----- | AIAPEK | ---IHRIV--- |
| transporter_[Chondrocystis_sp._NIES-4102]                               | ----- | ----- | ----- | AIAPEA | ---IHDLV--- |
| transporter_[Phormidesmis_priestleyi]                                   | ----- | ----- | ----- | AIAPEA | ---IYEVA--- |
| transporter_[Nostoc_piscinale]                                          | ----- | ----- | ----- | AIAPEA | ---THEIA--- |
| transporter_[Nosdoc_punctiforme]                                        | ----- | ----- | ----- | AIAPEA | ---IHAIA--- |
| transporter_[Nostoc_calicicola]                                         | ----- | ----- | ----- | AIAPEA | ---IHAIA--- |
| cationtransporter3_[Firmicutes_bacterium]                               | ----- | ----- | ----- | ALDHKV | ---IADLV--- |
| c.e.p_[Firmicutes_bacterium]                                            | ----- | ----- | ----- | AVDTNK | ---IRDIA--- |
| cationtransporter1_[Firmicutes_bacterium]                               | ----- | ----- | ----- | VVDPEE | ---IGRIV--- |
| cationtransporter2_[Firmicutes_bacterium]                               | ----- | ----- | ----- | AVDADE | ---IRNIV--- |
| cationtransporter1_[Actinobacteria_bacterium]                           | ----- | ----- | ----- | RIAPSA | ---IKDVA--- |
| cationtransporter2_[Actinobacteria_bacterium]                           | ----- | ----- | ----- | RIEPAV | ---ICDVV--- |
| c.e.p_[Candidatus_Woeseearchaeota_archaeon_CG08_land_8_20_14_0_20_43_7] | ----- | ----- | ----- | RKVVMH | ---LHKIV--- |
| transporter_[E.Coli]                                                    | ----- | ----- | ----- | LETENK | ---IKTTL--- |
| znt9-like2_[Candidatus_Micrarchaeota_archaeon]                          | ----- | ----- | ----- | KEVEEK | ---IKEIA--- |
| znt9-like_[Candidatus_Pacearchaeota_archaeon]                           | ----- | ----- | ----- | EEIEKK | ---IKKIA--- |
| znt9-like_[Candidatus_Aenigmarchaeota_archaeon_ex4484_52]               | ----- | ----- | ----- | EEIESK | ---IKNIA--- |
| znt9-likel1_[Candidatus_Micrarchaeota_archaeon]                         | ----- | ----- | ----- | AEELER | ---IVTLI--- |
| znt9-like4_[Candidatus_Micrarchaeota_archaeon]                          | ----- | ----- | ----- | KETMAK | ---IKGVL--- |
| znt9-like_[Candidatus_Woeseearchaeota_archaeon]                         | ----- | ----- | ----- | REKTGA | ---IERVLHQA |
| znt7_[Drosophila_melanogaster]                                          | ----- | ----- | ----- | DLI    | RSLPQCYQKV  |
| znt7_[Danio_rerio]                                                      | ----- | ----- | ----- | SLD    | HALPECYQRV  |
| znt7_human                                                              | ----- | ----- | ----- | LLE    | NSLPQCYQRV  |
| znt7_[Mus_musculus]                                                     | ----- | ----- | ----- | SLE    | NLPQCYQRV   |
| znt7_[Rattus_norvegicus]                                                | ----- | ----- | ----- | SLE    | NVLPQCYQRV  |
| znt5-like_[Ciona_intestinalis]                                          | ----- | ----- | ----- | HLQ    | KTLLQALSKV  |
| znt5_[Danio_rerio]                                                      | ----- | ----- | ----- | QHE    | KELNFALEKI  |
| znt5_human                                                              | ----- | ----- | ----- | EYE    | KELHIALEKI  |
| znt5_[Mus_musculus]                                                     | ----- | ----- | ----- | DHE    | KELHIALEKI  |
| znt5_[Rattus_norvegicus]                                                | ----- | ----- | ----- | DYE    | KELHIALEKV  |
| znt6_[Ciona_intestinalis]                                               | ----- | ----- | ----- | YLL    | GOLDKLLSEA  |
| znt6_[Danio_rerio]                                                      | ----- | ----- | ----- | HVI    | GOLDKLLREV  |
| znt6_human                                                              | ----- | ----- | ----- | HVI    | GOLDKLIREV  |
| znt6_[Rattus_norvegicus]                                                | ----- | ----- | ----- | HVI    | GOLDKLIREV  |
| znt6_isoform1_[Mus_musculus]                                            | ----- | ----- | ----- | HVI    | GOLDKLIREV  |
| znt6_isoform2_[Mus_musculus]                                            | ----- | ----- | ----- | HVI    | GOLDKLIREV  |
| znt4_[Danio_rerio]                                                      | ----- | ----- | ----- |        |             |
| cationtransporter1_[Candidatus_Micrarchaeota_archaeon]                  | ----- | ----- | ----- | GA     | DIEKIASAV   |
| transporter_[Geopsychrobacter_electrodiphilus]                          | ----- | ----- | ----- | NI     | TLEELESKL   |
| cationtransporter2_[Candidatus_Micrarchaeota_archaeon]                  | ----- | ----- | ----- | DI     | DFEKVYNAI   |
| znt10_[Danio_rerio]                                                     | ----- | ----- | ----- | DL     | PVSAILES    |
| znt10_human                                                             | ----- | ----- | ----- | GV     | NMEELMSKL   |
| znt10_[Mus_musculus]                                                    | ----- | ----- | ----- | GV     | NMEELMSQL   |
| znt10_[Rattus_norvegicus]                                               | ----- | ----- | ----- | GV     | NMEELMSQL   |
| znt1-likel1_[Hydra_vulgaris]                                            | ----- | ----- | ----- | NL     | KVKDLEERL   |
| znt1_[Ciona_intestinalis]                                               | ----- | ----- | ----- | HI     | KLQNMKENI   |
| znt1a_[Danio_rerio]                                                     | ----- | ----- | ----- | QI     | DMHQLNARL   |
| znt1_human                                                              | ----- | ----- | ----- | QI     | DIRNLIKEL   |

znt1\_[Mus\_musculus]  
znt1\_[Rattus\_norvegicus]  
znt1\_isoformG\_[Drosophila\_melanogaster]  
znt1\_isoformF\_[Drosophila\_melanogaster]  
znt1-like2\_[Hydra\_vulgaris]

```
-----  
-----  
-----  
-----  
-----  
-----
```

|    |   |           |
|----|---|-----------|
| QI | - | DIKHLVKEL |
| QI | - | DIKHLVKEL |
| HI | - | QVDAIQKRL |
| HI | - | QVDAIQKRL |
| HI | - | KIQEIQERI |

|                                                |       |       |             |       |       |       |       |       |       |
|------------------------------------------------|-------|-------|-------------|-------|-------|-------|-------|-------|-------|
| znt4_human                                     | -MK   | IEDV  | YSVEDLNIWS  | LTSG  | ----- | ----- | KSTAI | VHIQL | ----- |
| znt4_[Rattus_norvegicus]                       | -MK   | IEDV  | YSVEDLNIWS  | LTSG  | ----- | ----- | KATAI | VHMQL | ----- |
| znt4_isoforma_[Mus_musculus]                   | -MK   | IEDV  | YSVEDLNIWS  | LTSG  | ----- | ----- | KSTAI | VHMQL | ----- |
| znt4_isoformb_[Mus_musculus]                   | -MK   | IEDV  | YSVEDLNIWS  | LTSG  | ----- | ----- | KSTAI | VHMQL | ----- |
| znt8_human                                     | -LA   | VDGV  | LSVHSLHIWS  | LTMN  | ----- | ----- | QVILS | AHVAT | ----- |
| znt8_[Mus_musculus]                            | -LA   | VDGV  | ISVHSLHIWS  | LTVN  | ----- | ----- | QVILS | VHVAT | ----- |
| znt8_[Rattus_norvegicus]                       | -LT   | VDGV  | ISVHNLHIWS  | LTVN  | ----- | ----- | QVILS | VHVAT | ----- |
| znt3_human                                     | -LS   | VPGV  | RATHELHLWA  | LTLT  | ----- | ----- | YHVAS | AHLAI | ----- |
| znt3_[Rattus_norvegicus]                       | -LS   | VPGV  | RATHDLHLWA  | LTLT  | ----- | ----- | YHVAS | AHLAI | ----- |
| znt3_isoform1_[Mus_musculus]                   | -LS   | VPGV  | RATHDLHLWA  | LTLT  | ----- | ----- | YHVAS | AHLAI | ----- |
| znt3_isoform2_[Mus_musculus]                   | -LS   | VPGV  | RATHDLHLWA  | LTLT  | ----- | ----- | YHVAS | AHLAI | ----- |
| znt2-like_[Hydra_vulgaris]                     | -QN   | IQAV  | KMVHNLHLWS  | LTMD  | ----- | ----- | TPALS | VHLAI | ----- |
| znt35C_[Drosophila_melanogaster]               | -QG   | IEGV  | ERVHNLRIWA  | LSIN  | ----- | ----- | KVALS | AHLAI | ----- |
| znt2_[Ciona_intestinalis]                      | -LE   | IEGV  | TAVHDLRIWS  | LTLN  | ----- | ----- | QTVMS | AHLAI | ----- |
| znt8_[Danio_rerio]                             | -LG   | VKGV  | KAVHNLHIWA  | LTMN  | ----- | ----- | QAVLS | AHVAT | ----- |
| znt2_[Danio_rerio]                             | -LS   | LKAV  | KAMHSLHLWA  | LTLS  | ----- | ----- | QSLLS | VHIAI | ----- |
| znt3_isoformX1_[Danio_rerio]                   | -LS   | LKAV  | KAMHSLHLWA  | LTLS  | ----- | ----- | QSLLS | VHIAI | ----- |
| znt2_human                                     | -LS   | VEGV  | EALHSLHIWA  | LTVA  | ----- | ----- | QPVLS | VHIAI | ----- |
| znt2_isoform1_[Mus_musculus]                   | -LS   | VDGV  | EALHSLHIWA  | LTVA  | ----- | ----- | QPVLS | VHIAI | ----- |
| znt2_isoform2_[Mus_musculus]                   | -LS   | VDGV  | EALHSLHIWA  | LTVA  | ----- | ----- | QPVLS | VHIAI | ----- |
| znt2_isoform1_[Rattus_norvegicus]              | -LS   | VDGV  | EALHSLHIWA  | LTVA  | ----- | ----- | QPVLS | VHIAI | ----- |
| znt2_isoform2_[Rattus_norvegicus]              | -LS   | VDGV  | EALHSLHIWA  | LTVA  | ----- | ----- | QPVLS | VHIAI | ----- |
| znt9-like_[Hydra_vulgaris]                     | -EN   | DIMV  | RSIHDVKATE  | MGAD  | ----- | ----- | TVRFK | AELNF | ----- |
| znt9_[Drosophila_melanogaster]                 | -EA   | DVMI  | RAIYDVKGID  | IGNA  | ----- | ----- | RVRVK | AELDF | ----- |
| znt9-like_[Ciona_intestinalis]                 | -ED   | DAVI  | RGVYDVKATQ  | LSSE  | ----- | ----- | EKFKK | AEIDF | ----- |
| znt9_[Danio_rerio]                             | -EN   | DPAV  | RAIHDVKATD  | MGLS  | ----- | ----- | KVRFK | AEVDF | ----- |
| znt9_human                                     | -EN   | DPSV  | RAIHDVKATD  | LGLG  | ----- | ----- | KVRFK | AEVDF | ----- |
| znt9_[Rattus_norvegicus]                       | -ES   | DPSV  | RAIHDVKATD  | LGLG  | ----- | ----- | KVRFK | AEVDF | ----- |
| isoform1_znt9_[Mus_musculus]                   | -ES   | DPSV  | RAIHDVKATD  | LGLG  | ----- | ----- | KVRFK | AEVDF | ----- |
| isoform2_znt9_[Mus_musculus]                   | -ES   | DPSV  | RAIHDVKATD  | LGLG  | ----- | ----- | KVRFK | AEVDF | ----- |
| znt9like_[E.Coli_partial]                      | ----- | ----- | -----       | ----- | ----- | ----- | ----- | ----- | ----- |
| znt9like_[Rhodanobacter_glycinis]              | -EG   | RPEV  | AEVLNLTITVQ | MGPD  | ----- | ----- | VMVA  | VKARM | ----- |
| znt9like_[Dyella_ginsengisoli]                 | -KS   | RSEV  | AEVLNLTITLQ | MGPD  | ----- | ----- | VMVA  | VKARM | ----- |
| znt9like2_[Actinobacteria_bacterium]           | -ST   | TPRV  | LGI IHLRTMH | LGPD  | ----- | ----- | QLLVA | AKLEF | ----- |
| znt9like_[Firmicutes_bacterium]                | -LA   | IPQV  | VGIANLATMH  | LGAE  | ----- | ----- | VLLC  | ADLTF | ----- |
| znt9-like3_[Candidatus_Micrarchaeota_archaeon] | -AS   | VPEV  | QEVMDILTMH  | LAPD  | ----- | ----- | DVLVN | LNINF | ----- |
| znt9like_[Mesorhizobium_sp._L2C054A000]        | -QQ   | DPAV  | QRANGVLT VH | LGPR  | ----- | ----- | QIVAG | LSIEF | ----- |
| znt9like_[Geopsychrobacter_electrodiphilus]    | -AA   | YPDV  | EHVNQVLT MH | MGPO  | ----- | ----- | HILVN | LSVDF | ----- |
| znt9like_[Sneathiella_limimaris]               | -RS   | GDGI  | LAVNEILTMH  | LGPT  | ----- | ----- | DILVT | MSVDF | ----- |
| znt9like_[Sneathiella_sp]                      | -AR   | DPRI  | ENLNELLTMH  | LGPK  | ----- | ----- | DILVN | LSLDF | ----- |
| znt9like_[Sneathiella_chungangensis]           | -CD   | DSRI  | LRVNELLTMH  | LGPK  | ----- | ----- | DILVN | VSLDF | ----- |
| znt9like_[Leptolyngbya_foveolarum]             | -KS   | DVAV  | SAEPPITLH   | LGPE  | ----- | ----- | DILLA | LNIEF | ----- |
| znt9like_[Massilia_sp._LC238]                  | -RR   | EPAL  | DSVSSLRTMQ  | MGPE  | ----- | ----- | EVLLA | ANSQF | ----- |
| znt9like1_[Variovorax_paradoxus]               | -MA   | QPSV  | EEVGRVLSMY  | IGPD  | ----- | ----- | QVLAI | VDVNF | ----- |
| znt9like2_[Variovorax_paradoxus]               | -ME   | QPSV  | EDVGHVLSMY  | IGAD  | ----- | ----- | EALVI | VDVNF | ----- |
| znt9like_[Nitrosospira_sp._Nsp11]              | -LR   | DPAV  | IAVNQVLT LV | FGPE  | ----- | ----- | EVLLN | IKAQF | ----- |
| znt9like_[Sorangium_cellulosum]                | -GA   | DPGV  | SAVGRPLTMH  | FGPH  | ----- | ----- | EVLVV | LRIEF | ----- |
| znt9like1_[Actinobacteria_bacterium]           | -AQ   | DRSV  | RETARALTMY  | VGPR  | ----- | ----- | DVLLN | LEIQF | ----- |
| znt9like_[Phormidismis_priestleyi]             | -LE   | DDAV  | DDVLKLLTLY  | FGPH  | ----- | ----- | EVLLN | LEIQF | ----- |
| znt9like1_[Nosdoc_punctiforme]                 | -KT   | EPGV  | QEVIRVLT MQ | LAPQ  | ----- | ----- | EVLLN | LEIQF | ----- |
| znt9like2_[Nosdoc_punctiforme]                 | -KT   | EPRV  | QKVIRILT MQ | LAPQ  | ----- | ----- | EVLLN | LEIQF | ----- |
| znt9like_[Nostoc_calcicola]                    | -KT   | EPGV  | KEVIRVLT MQ | LAPK  | ----- | ----- | EVLLN | LEIQF | ----- |
| znt9like_[Nostoc_commune]                      | -KT   | EPGV  | KEVIRVLT MQ | LAPK  | ----- | ----- | EVLLN | LEIQF | ----- |
| znt9like_[Nostoc_piscinale]                    | -KT   | EPKV  | QEVLRILT MQ | LAPQ  | ----- | ----- | EVLLN | LEIQF | ----- |

znt9like\_[Nostoc\_cycadae]  
znt9like\_[Myxosarcina\_sp.\_GI1]  
znt9like\_[Chondrocystis\_sp.\_NIES-4102]  
znt9like\_[Pleurocapsa\_sp.\_PCC\_7319]  
znt33D\_[Drosophila\_melanogaster]  
transporter\_[Pleurocapsa\_sp.\_PCC\_7319]  
transporter\_[Leptolyngbya\_foveolarum]  
transporter\_[Myxosarcina\_sp.\_GI1]  
transporter\_[Chondrocystis\_sp.\_NIES-4102]  
transporter\_[Phormidesmis\_priestleyi]  
transporter\_[Nostoc\_piscinale]  
transporter\_[Nostoc\_punctiforme]  
transporter\_[Nostoc\_caldicola]  
cationtransporter3\_[Firmicutes\_bacterium]  
c.e.p\_[Firmicutes\_bacterium]  
cationtransporter1\_[Firmicutes\_bacterium]  
cationtransporter2\_[Firmicutes\_bacterium]  
cationtransporter1\_[Actinobacteria\_bacterium]  
cationtransporter2\_[Actinobacteria\_bacterium]  
c.e.p\_[Candidatus\_Woeseearchaeota\_archaeon\_CG08\_land\_8\_20\_14\_0\_20\_43\_7]  
transporter\_[E.Coli]  
znt9-like2\_[Candidatus\_Micrarchaeota\_archaeon]  
znt9-like\_[Candidatus\_Pacearchaeota\_archaeon]  
znt9-like\_[Candidatus\_Aenigmarchaeota\_archaeon\_ex4484\_52]  
znt9-likel1\_[Candidatus\_Micrarchaeota\_archaeon]  
znt9-like4\_[Candidatus\_Micrarchaeota\_archaeon]  
znt9-like\_[Candidatus\_Woeseearchaeota\_archaeon]  
znt7\_[Drosophila\_melanogaster]  
znt7\_[Danio\_rerio]  
znt7\_human  
znt7\_[Mus\_musculus]  
znt7\_[Rattus\_norvegicus]  
znt5-like\_[Ciona\_intestinalis]  
znt5\_[Danio\_rerio]  
znt5\_human  
znt5\_[Mus\_musculus]  
znt5\_[Rattus\_norvegicus]  
znt6\_[Ciona\_intestinalis]  
znt6\_[Danio\_rerio]  
znt6\_human  
znt6\_[Rattus\_norvegicus]  
znt6\_isoform1\_[Mus\_musculus]  
znt6\_isoform2\_[Mus\_musculus]  
znt4\_[Danio\_rerio]  
cationtransporter1\_[Candidatus\_Micrarchaeota\_archaeon]  
transporter\_[Geopsychrobacter\_electrodiphilus]  
cationtransporter2\_[Candidatus\_Micrarchaeota\_archaeon]  
znt10\_[Danio\_rerio]  
znt10\_human  
znt10\_[Mus\_musculus]  
znt10\_[Rattus\_norvegicus]  
znt1-likel1\_[Hydra\_vulgaris]  
znt1\_[Ciona\_intestinalis]  
znt1a\_[Danio\_rerio]  
znt1\_human

|      |      |             |            |      |       |          |       |      |
|------|------|-------------|------------|------|-------|----------|-------|------|
| -KI  | EPGV | QEVIRVLTMQ  | LAPQ       | ---- | ----  | EVLLN    | LEIQF | ---- |
| -KA  | DPAV | RNVLKVLTLLH | FGPE       | ---- | ----  | EILLN    | LEIQF | ---- |
| -NA  | DPAV | EKVIKVLTLH  | FGPO       | ---- | ----  | EILLN    | LEIEF | ---- |
| -SE  | DPAV | AEVVKVLTLLH | FGPO       | ---- | ----  | EVLLN    | LEIEF | ---- |
| ---- | ---- | ----        | ----       | ---- | ----  | ----     | ----  | ---- |
| -MD  | VYGV | LNCHSITS    | RGVV       | ---- | ----  | GOEIFIE  | MHLVV | ---- |
| -MQ  | IPGV | LNCHNIAS    | RGLL       | ---- | ----  | GROVFID  | MHLIV | ---- |
| -MT  | TPGV | VNCHDIAS    | RGVV       | ---- | ----  | GROVFIE  | MHLIV | ---- |
| -MQ  | VPGV | VNCHDIAS    | RGML       | ---- | ----  | GROVFIE  | MHLIV | ---- |
| -MQ  | VPGV | LNCHDIAS    | RGVV       | ---- | ----  | GRQSFIE  | MHLIV | ---- |
| -TS  | VPGV | LNCHDIAS    | RGIL       | ---- | ----  | GROVFIE  | MHLIV | ---- |
| -TS  | APGV | INCHDIAS    | RGVL       | ---- | ----  | GROVFIE  | MHLIV | ---- |
| -TS  | VPGV | INCHAIAS    | RGVL       | ---- | ----  | GROVFIE  | MHLIV | ---- |
| -YQ  | FQEV | KNVHEIRS    | RGRD       | ---- | ----  | D-EVFFID | LHIET | ---- |
| -LS  | FEQV | KDTHSIRS    | RGCE       | ---- | ----  | P-DLYID  | MHIMT | ---- |
| -MS  | FEKV | KDVHNIRS    | RGSK       | ---- | ----  | H-DMHID  | MHIVT | ---- |
| -LS  | FDKV | KDAHKIRS    | RGSN       | ---- | ----  | N-DLHVD  | MHIMT | ---- |
| -LG  | VEGV | LGVHDIRT    | RGPV       | ---- | ----  | S-EVYVD  | LHIQV | ---- |
| -LG  | CAGV | LGCHHIRT    | RGSS       | ---- | ----  | A-EVYVD  | LHVQV | ---- |
| -AD  | FPGV | TDHNNVKI    | RPLG       | ---- | ----  | S-SLCLT  | LHICV | ---- |
| -LS  | TPGV | EGIHDLKT    | RKMG       | ---- | ----  | D-LVVVD  | VHLEI | ---- |
| ---- | KKQS | ITISDLKT    | LKKG       | ---- | ----  | S-AITAN  | LKISL | ---- |
| ---- | KENK | LKISELKT    | LKKG       | ---- | ----  | S-AITAN  | LEIKI | ---- |
| ---- | KEQN | IKISELKT    | QKKA       | ---- | ----  | F-AITAD  | IEIVI | ---- |
| -SK  | TKEI | KGYHKLRT    | RHMG       | ---- | ----  | S-RLVVD  | LHIQV | ---- |
| -VA  | EKRI | TRFHKLRA    | RIAG       | ---- | ----  | S-RILVD  | AHIHL | ---- |
| -IR  | SGRI | TRYHKLRA    | RMAG       | ---- | ----  | S-KILLE  | FHIHV | ---- |
| -TG  | LAGV | YAVQEPHFWT  | LCSD       | ---- | ----  | VYVGA    | LKLEV | ---- |
| -QQ  | LQGV | YNLQEPHFWT  | LCTD       | ---- | ----  | VYIGT    | LKLLV | ---- |
| -QQ  | LQGV | YSLQEQHFWT  | LCSD       | ---- | ----  | VYVGT    | LKLLV | ---- |
| -QQ  | LQGV | YNLQEQHFWT  | LCSD       | ---- | ----  | VYVGT    | LKLVV | ---- |
| -QQ  | LQGV | YNLQEQHFWT  | LCSD       | ---- | ----  | VYVGT    | LKLVV | ---- |
| -NA  | VEGI | TTHRTCVRVQ  | HTEK       | ---- | ----  | EAAAV    | VSVHV | ---- |
| -QK  | IEGV | LSYRDPHFWR  | HSAS       | ---- | ----  | VIAGT    | IHLQL | ---- |
| -QK  | IEGL | ISYRDPHFWR  | HSAS       | ---- | ----  | IVAGT    | IHIQV | ---- |
| -QK  | IEGL | ISYRDPHFWR  | HSAS       | ---- | ----  | IVAGT    | IHIQV | ---- |
| -QK  | LEGL | ISYRDPHFWR  | HSAS       | ---- | ----  | IVAGT    | IHIQV | ---- |
| -QT  | LDGV | LEIRNERFYT  | VSLSVNNKKR | YHNG | LTMVG | S        | INVRV | ---- |
| -ST  | LDGV | LEVRNEHFWT  | IGFG       | ---- | ----  | SLAGS    | VHVRI | ---- |
| -ST  | LDGV | LEVRNEHFWT  | LGFG       | ---- | ----  | SLAGS    | VHVRI | ---- |
| -ST  | LDGV | LEVRNEHFWT  | LGFG       | ---- | ----  | SLAGS    | VHVRI | ---- |
| -ST  | LDGV | LEVRNEHFWT  | LGFG       | ---- | ----  | SLAGS    | VHVRI | ---- |
| -ST  | LDGV | LEVRNEHFWT  | LGFG       | ---- | ----  | SLAGS    | VHVRI | ---- |
| ---- | ---- | ----        | ----       | ---- | ----  | ----     | ----  | ---- |
| -RS  | IKGV | RGVHDIHVWR  | TCSE       | ---- | ----  | LCFAM    | MHVET | ---- |
| -AE  | LPGV | CDAHHIHLWQ  | VDDR       | ---- | ----  | DIHFE    | AHIAV | ---- |
| -NN  | AEGV | RSVHNLHIWS  | IDSN       | ---- | ----  | EIFLS    | CHICM | ---- |
| -CR  | LPGV | SSVHEAHVWE  | LAKG       | ---- | ----  | RNVAS    | LHVKL | ---- |
| -SA  | VPGI | SSVHEVHIWE  | LVSG       | ---- | ----  | KIIAT    | LHIKY | ---- |
| -ST  | VPGI | SSVHEVHIWE  | LISG       | ---- | ----  | KIIAT    | LHIKH | ---- |
| -SM  | VPGV | SSVHEVHIWE  | LISG       | ---- | ----  | KVIAT    | LHIKH | ---- |
| MNK  | ICSV | LSIHEFHIWA  | LGDG       | ---- | ----  | QVVAS    | AHILF | ---- |
| -QT  | IEGV | QEIHFHIIWQ  | LTGE       | ---- | ----  | KLvat    | VHVQC | ---- |
| -RD  | LEGV | LAVHELHIWQ  | LAGS       | ---- | ----  | RIIAT    | AHIKC | ---- |
| -RN  | VEGV | EEVHELHVWQ  | LAGS       | ---- | ----  | RIIAT    | AHIKC | ---- |

znt1\_[Mus\_musculus]  
znt1\_[Rattus\_norvegicus]  
znt1\_isoformG\_[Drosophila\_melanogaster]  
znt1\_isoformF\_[Drosophila\_melanogaster]  
znt1-like2\_[Hydra\_vulgaris]

|     |        |            |      |       |       |       |       |       |
|-----|--------|------------|------|-------|-------|-------|-------|-------|
| -RD | --VDGV | EEVHELHVWQ | LAGS | ----- | ----- | RIIAT | AHIKC | ----- |
| -RD | --VEGV | EEVHELHVWQ | LAGS | ----- | ----- | RIIAT | AHIKC | ----- |
| LEK | --VDGV | LAVHEFHVWQ | LAGD | ----- | ----- | RIIAS | AHIRC | ----- |
| LEK | --VDGV | LAVHEFHVWQ | LAGD | ----- | ----- | RIIAS | AHIRC | ----- |
| VEQ | --VPQV | LSIHEFHIWQ | LAGN | ----- | ----- | KIIAS | AHVQC | ----- |



znt4\_human  
znt4\_[Rattus\_norvegicus]  
znt4\_isoforma\_[Mus\_musculus]  
znt4\_isoformb\_[Mus\_musculus]  
znt8\_human  
znt8\_[Mus\_musculus]  
znt8\_[Rattus\_norvegicus]  
znt3\_human  
znt3\_[Rattus\_norvegicus]  
znt3\_isoform1\_[Mus\_musculus]  
znt3\_isoform2\_[Mus\_musculus]  
znt2-like\_[Hydra\_vulgaris]  
znt35C\_[Drosophila\_melanogaster]  
znt2\_[Ciona\_intestinalis]  
znt8\_[Danio\_rerio]  
znt2\_[Danio\_rerio]  
znt3\_isoformX1\_[Danio\_rerio]  
znt2\_human  
znt2\_isoform1\_[Mus\_musculus]  
znt2\_isoform2\_[Mus\_musculus]  
znt2\_isoform1\_[Rattus\_norvegicus]  
znt2\_isoform2\_[Rattus\_norvegicus]  
znt9-like\_[Hydra\_vulgaris]  
znt9\_[Drosophila\_melanogaster]  
znt9-like\_[Ciona\_intestinalis]  
znt9\_[Danio\_rerio]  
znt9\_human  
znt9\_[Rattus\_norvegicus]  
isoform1\_znt9\_[Mus\_musculus]  
isoform2\_znt9\_[Mus\_musculus]  
znt9like\_[E.Coli\_partial]  
znt9like\_[Rhodanobacter\_glycinis]  
znt9like\_[Dyella\_ginsengisoli]  
znt9like2\_[Actinobacteria\_bacterium]  
znt9like\_[Firmicutes\_bacterium]  
znt9-like3\_[Candidatus\_Micrarchaeota\_archaeon]  
znt9like\_[Mesorhizobium\_sp.\_L2C054A000]  
znt9like\_[Geopsychrobacter\_electrodiphilus]  
znt9like\_[Sneathiella\_limimaris]  
znt9like\_[Sneathiella\_sp]  
znt9like\_[Sneathiella\_chungangensis]  
znt9like\_[Leptolyngbya\_foveolarum]  
znt9like\_[Massilia\_sp.\_LC238]  
znt9like1\_[Variovorax\_paradoxus]  
znt9like2\_[Variovorax\_paradoxus]  
znt9like\_[Nitrosospira\_sp.\_Nsp11]  
znt9like\_[Sorangium\_cellulosum]  
znt9like1\_[Actinobacteria\_bacterium]  
znt9like\_[Phormidesmis\_priestleyi]  
znt9like1\_[Nosdoc\_punctiforme]  
znt9like2\_[Nosdoc\_punctiforme]  
znt9like\_[Nostoc\_calcicola]  
znt9like\_[Nostoc\_commune]  
znt9like\_[Nostoc\_piscinale]

1601

|          |     |     |         |     |          |
|----------|-----|-----|---------|-----|----------|
| IPGSSSKW | --- | --- | ---     | --- | E        |
| IPGSSSKW | --- | --- | ---     | --- | E        |
| IPGSSSKW | --- | --- | ---     | --- | E        |
| IPGSSSKW | --- | --- | ---     | --- | E        |
| AASR--DS | --- | --- | ---     | --- | Q        |
| AASQ--DS | --- | --- | ---     | --- | Q        |
| GQ       | --- | --- | ---     | --- | ---      |
| DSTA--DP | --- | --- | ---     | --- | E        |
| DSTA--DP | --- | --- | ---     | --- | E        |
| DSTA--DP | --- | --- | ---     | --- | E        |
| DSTA--DP | --- | --- | ---     | --- | E        |
| DDSR--ST | --- | --- | ---     | --- | H        |
| AENA--NP | --- | --- | ---     | --- | K        |
| DKGT--DP | --- | --- | ---     | --- | N        |
| DETV--DP | --- | --- | ---     | --- | Q        |
| ---      | --- | --- | ---     | --- | Q        |
| ---      | --- | --- | ---     | --- | Q        |
| EENA--DP | --- | --- | ---     | --- | Q        |
| AQNT--DA | --- | --- | ---     | --- | Q        |
| AQNA--DA | --- | --- | ---     | --- | Q        |
| AQNA--DA | --- | --- | ---     | --- | Q        |
| AQNV--DA | --- | --- | ---     | --- | Q        |
| AQNV--DA | --- | --- | ---     | --- | Q        |
| DGREITRV | --- | --- | HLNQLDM | --- | NLVLSVM  |
| DGRELTRS | --- | --- | YLDKQDL | --- | AKLLTTVR |
| DGREITRA | --- | --- | YLASVDM | --- | ENMLQEIH |
| DGRVVTRS | --- | --- | YLEKQDI | --- | EQILNEIQ |
| DGRVVTRS | --- | --- | YLEKQDF | --- | DOMLQEIQ |
| DGRVVTRS | --- | --- | YLEKQDF | --- | QMMQEIIE |
| DGRVVTRS | --- | --- | YLEKQDF | --- | QMMQEIQ  |
| DGRVVTRS | --- | --- | YLEKQDF | --- | QMMQEIQ  |
| ---      | --- | --- | ---     | --- | ---      |
| QPAASD   | --- | --- | ---     | --- | ---      |
| EPASSD   | --- | --- | ---     | --- | ---      |
| DHSLTV   | --- | --- | ---     | --- | ---      |
| AHG TSA  | --- | --- | ---     | --- | ---      |
| ADGLTT   | --- | --- | ---     | --- | ---      |
| EDHLTA   | --- | --- | ---     | --- | ---      |
| SDQTTA   | --- | --- | ---     | --- | ---      |
| QDGLTT   | --- | --- | ---     | --- | ---      |
| ADPLTA   | --- | --- | ---     | --- | ---      |
| ADDLTS   | --- | --- | ---     | --- | ---      |
| ENLSA    | --- | --- | ---     | --- | ---      |
| RRGMRI   | --- | --- | ---     | --- | ---      |
| KDDTDT   | --- | --- | ---     | --- | ---      |
| KDDIST   | --- | --- | ---     | --- | ---      |
| VPSLSV   | --- | --- | ---     | --- | ---      |
| DAALTA   | --- | --- | ---     | --- | ---      |
| EKGITE   | --- | --- | ---     | --- | ---      |
| DRTL SA  | --- | --- | ---     | --- | ---      |
| SKNLTG   | --- | --- | ---     | --- | ---      |
| SNNLTG   | --- | --- | ---     | --- | ---      |
| SHNLTG   | --- | --- | ---     | --- | ---      |
| SHNLTG   | --- | --- | ---     | --- | ---      |
| SRNLTG   | --- | --- | ---     | --- | ---      |

|                                                                        |            |         |       |       |       |
|------------------------------------------------------------------------|------------|---------|-------|-------|-------|
| znt9like_[Nostoc_cycadae]                                              | AKNLTG     | ----    | ----- | ----- | ----- |
| znt9like_[Myxosarcina_sp._GI1]                                         | TKKLST     | ----    | ----- | ----- | ----- |
| znt9like_[Chondrocystis_sp._NIES-4102]                                 | IEDLET     | ----    | ----- | ----- | ----- |
| znt9like_[Pleurocapsa_sp._PCC_7319]                                    | KEDLET     | ----    | ----- | ----- | ----- |
| znt33D_[Drosophila_melanogaster]                                       |            |         |       |       |       |
| transporter_[Pleurocapsa_sp._PCC_7319]                                 | APR_EI     | ----    | ----- | ----- | ----- |
| transporter_[Leptolyngbya_foveolarum]                                  | EPK_DV     | ----    | ----- | ----- | ----- |
| transporter_[Myxosarcina_sp._GI1]                                      | DTS_DV     | ----    | ----- | ----- | ----- |
| transporter_[Chondrocystis_sp._NIES-4102]                              | DTD_DL     | ----    | ----- | ----- | ----- |
| transporter_[Phormidesmis_priestleyi]                                  | EPR_DV     | ----    | ----- | ----- | ----- |
| transporter_[Nostoc_piscinale]                                         | DAP_DV     | ----    | ----- | ----- | ----- |
| transporter_[Nosdoc_punctiforme]                                       | DAP_DV     | ----    | ----- | ----- | ----- |
| transporter_[Nostoc_caldicola]                                         | DAP_DV     | ----    | ----- | ----- | ----- |
| cationtransporter3_[Firmicutes_bacterium]                              | NPAMSV     | ----    | ----- | ----- | ----- |
| c.e.p_[Firmicutes_bacterium]                                           | EPMSV      | ----    | ----- | ----- | ----- |
| cationtransporter1_[Firmicutes_bacterium]                              | EHDLSV     | ----    | ----- | ----- | ----- |
| cationtransporter2_[Firmicutes_bacterium]                              | EPDLNV     | ----    | ----- | ----- | ----- |
| cationtransporter1_[Actinobacteria_bacterium]                          | DPTITV     | ----    | ----- | ----- | ----- |
| cationtransporter2_[Actinobacteria_bacterium]                          | DESRTV     | ----    | ----- | ----- | ----- |
| c.e.p_[Candidatus_Woesearchaeota_archaeon_CG08_land_8_20_14_0_20_43_7] | KDKLTV     | ----    | ----- | ----- | ----- |
| transporter_[E.Coli]                                                   | NGNLSV     | ----    | ----- | ----- | ----- |
| znt9-like2_[Candidatus_Micrarchaeota_archaeon]                         | PSKLTII    | ----    | ----- | ----- | ----- |
| znt9-like_[Candidatus_Pacearchaeota_archaeon]                          | PSKLSV     | ----    | ----- | ----- | ----- |
| znt9-like_[Candidatus_Aenigmarchaeota_archaeon_ex4484_52]              | SNKLN      | ----    | ----- | ----- | ----- |
| znt9-likel_[Candidatus_Micrarchaeota_archaeon]                         | EGKMTI     | ----    | ----- | ----- | ----- |
| znt9-like4_[Candidatus_Micrarchaeota_archaeon]                         | PHGMPV     | ----    | ----- | ----- | ----- |
| znt9-like_[Candidatus_Woesearchaeota_archaeon]                         | PRKMSV     | ----    | ----- | ----- | ----- |
| znt7_[Drosophila_melanogaster]                                         | SKNVD      | ----    | ----- | ----- | ----- |
| znt7_[Danio_rerio]                                                     | APDAD      | ----    | ----- | ----- | ----- |
| znt7_human                                                             | APDAD      | ----    | ----- | ----- | ----- |
| znt7_[Mus_musculus]                                                    | APDAD      | ----    | ----- | ----- | ----- |
| znt7_[Rattus_norvegicus]                                               | APDAD      | ----    | ----- | ----- | ----- |
| znt5-like_[Ciona_intestinalis]                                         | EPHVI      | ----    | ----- | ----- | ----- |
| znt5_[Danio_rerio]                                                     | MSDVV      | ----    | ----- | ----- | ----- |
| znt5_human                                                             | TSDVL      | ----    | ----- | ----- | ----- |
| znt5_[Mus_musculus]                                                    | TSEVL      | ----    | ----- | ----- | ----- |
| znt5_[Rattus_norvegicus]                                               | TSDVL      | ----    | ----- | ----- | ----- |
| znt6_[Ciona_intestinalis]                                              | RRDAEQMVL  | AHVTHRL | ----  | ----- | ----- |
| znt6_[Danio_rerio]                                                     | RRDAEQMVL  | AHVWNRL | ----  | ----- | ----- |
| znt6_human                                                             | RRDANEQMVL | AHVTNRL | ----  | ----- | ----- |
| znt6_[Rattus_norvegicus]                                               | RRDANEQMVL | AHVTNRL | ----  | ----- | ----- |
| znt6_isoform1_[Mus_musculus]                                           | RRDANEQMVL | AHVSNRL | ----  | ----- | ----- |
| znt6_isoform2_[Mus_musculus]                                           | RRDANEQMVL | AHVSNRL | ----  | ----- | ----- |
| znt4_[Danio_rerio]                                                     |            |         |       |       |       |
| cationtransporter1_[Candidatus_Micrarchaeota_archaeon]                 | NNISLLE    | ----    | ----- | ----- | ----- |
| transporter_[Geopsychrobacter_electrodiphilus]                         | DDALLSA    | ----    | ----- | ----- | ----- |
| cationtransporter2_[Candidatus_Micrarchaeota_archaeon]                 | ERERKSN    | ----    | ----- | ----- | ----- |
| znt10_[Danio_rerio]                                                    | QAPAG      | ----    | ----- | ----- | ----- |
| znt10_human                                                            | PKDRG      | ----    | ----- | ----- | ----- |
| znt10_[Mus_musculus]                                                   | QKGTE      | ----    | ----- | ----- | ----- |
| znt10_[Rattus_norvegicus]                                              | QEGTE      | ----    | ----- | ----- | ----- |
| znt1-likel_[Hydra_vulgaris]                                            | ETPEE      | ----    | ----- | ----- | ----- |
| znt1_[Ciona_intestinalis]                                              | SDAET      | ----    | ----- | ----- | ----- |
| znt1a_[Danio_rerio]                                                    | HDPTS      | ----    | ----- | ----- | ----- |
| znt1_human                                                             | EDPTS      | ----    | ----- | ----- | ----- |

znt1\_[Mus\_musculus]  
znt1\_[Rattus\_norvegicus]  
znt1\_isoformG\_[Drosophila\_melanogaster]  
znt1\_isoformF\_[Drosophila\_melanogaster]  
znt1-like2\_[Hydra\_vulgaris]

|       |       |       |       |       |       |
|-------|-------|-------|-------|-------|-------|
| EDPAS | ----- | ----- | ----- | ----- | ----- |
| EDPAS | ----- | ----- | ----- | ----- | ----- |
| RNLSE | ----- | ----- | ----- | ----- | ----- |
| RNLSE | ----- | ----- | ----- | ----- | ----- |
| NTLDD | ----- | ----- | ----- | ----- | ----- |

|                                                |             |            |            |             |             |            |            |
|------------------------------------------------|-------------|------------|------------|-------------|-------------|------------|------------|
| znt4_human                                     | -----       | -----      | ---        | EVQSKA      | NHLLL       | NTFG       | MYRCTIQLOS |
| znt4_[Rattus_norvegicus]                       | -----       | -----      | ---        | EVQSKA      | KHLLL       | NTFG       | MYKCTVQLQS |
| znt4_isoforma_[Mus_musculus]                   | -----       | -----      | ---        | EVQSKA      | KHLLL       | NTFG       | MYKCTIQLOS |
| znt4_isoformb_[Mus_musculus]                   | -----       | -----      | ---        | EVQSKA      | KHLLL       | NTFG       | MYKCTIQLOS |
| znt8_human                                     | -----       | -----      | ---        | VVRREI      | AKALS       | KSFT       | MHSLTIQMES |
| znt8_[Mus_musculus]                            | -----       | -----      | ---        | SVRTGI      | AQALS       | SFD        | LHSLTIQIES |
| znt8_[Rattus_norvegicus]                       | -----       | -----      | ---        | -----       | -----       | -----      | -----      |
| znt3_human                                     | -----       | -----      | ---        | AVLAEA      | SSRLY       | SRFG       | FSSCTLQVEQ |
| znt3_[Rattus_norvegicus]                       | -----       | -----      | ---        | AILAEA      | SSRLY       | SRFG       | FSSCTLQVEK |
| znt3_isoform1_[Mus_musculus]                   | -----       | -----      | ---        | AVLAEA      | SSRLY       | SRFG       | FSSCTLQVEQ |
| znt3_isoform2_[Mus_musculus]                   | -----       | -----      | ---        | AVLAEA      | SSRLY       | SRFG       | FSSCTLQVEQ |
| znt2-like_[Hydra_vulgaris]                     | -----       | -----      | ---        | SVLREA      | QTLVS       | RKYD       | IHHSTIQVEK |
| znt35C_[Drosophila_melanogaster]               | -----       | -----      | ---        | RILDAA      | TSAVH       | LRYN       | FFETTIQIED |
| znt2_[Ciona_intestinalis]                      | -----       | -----      | ---        | LVLKRA      | TRRLK       | SLYD       | FHSLTIQVEY |
| znt8_[Danio_rerio]                             | -----       | -----      | ---        | EVLREM      | TQVCF       | TKYS       | FHSVTIQLEP |
| znt2_[Danio_rerio]                             | -----       | -----      | ---        | SVLKEA      | TELLQ       | TKFG       | FYSTTIQVEP |
| znt3_isoformX1_[Danio_rerio]                   | -----       | -----      | ---        | SVLKEA      | TELLQ       | TKFG       | FYSTTIQVEP |
| znt2_human                                     | -----       | -----      | ---        | AVLKTA      | SSRLQ       | GKFH       | FHTVTIQIED |
| znt2_isoform1_[Mus_musculus]                   | -----       | -----      | ---        | AVLKVA      | RDRLO       | GKFN       | FHTMTIQIEK |
| znt2_isoform2_[Mus_musculus]                   | -----       | -----      | ---        | AVLKVA      | RDRLO       | GKFN       | FHTMTIQIEK |
| znt2_isoform1_[Rattus_norvegicus]              | -----       | -----      | ---        | AVLKVA      | RDRLO       | GKFN       | FHTMTIQIES |
| znt2_isoform2_[Rattus_norvegicus]              | -----       | -----      | ---        | AVLKVA      | RDRLO       | GKFN       | FHTMTIQIES |
| znt9-like_[Hydra_vulgaris]                     | KIKTPEELEQ  | FLLEHGEOII | DVLGAQVDRL | ERNIKKNHPE  | VRHVDLEIL   | -----      | -----      |
| znt9_[Drosophila_melanogaster]                 | GFQKVEDLES  | FLLDQGENIV | DLMGGEIDRI | EMNLRTQFPE  | IRHVDLEIL   | -----      | -----      |
| znt9-like_[Ciona_intestinalis]                 | AVQTLLEELEI | LISRYGEHVI | DTLGVHVDRI | ESELKKNPD   | LRHIDLEVL   | -----      | -----      |
| znt9_[Danio_rerio]                             | QVKTPEELEN  | FMLKHGENII | DTLGAEVDRL | EKELKQRNPE  | VRHVDLEIL   | -----      | -----      |
| znt9_human                                     | EVKTPEELET  | FMLKHGENII | DTLGAEVDRL | EKELKQRNPE  | VRHVDLEIL   | -----      | -----      |
| znt9_[Rattus_norvegicus]                       | EVKTPEOLEA  | FMLKHGENII | DTLGAEVDRL | EKELKQRNPE  | VRHVDLEIL   | -----      | -----      |
| isoform1_znt9_[Mus_musculus]                   | EVKTPEOLEA  | FMLKHGENII | DTLGAEVDRL | EKELKQRNPE  | VRHVDLEIL   | -----      | -----      |
| isoform2_znt9_[Mus_musculus]                   | EVKTPEOLEA  | FMLKHGENII | DTLGAEVDRL | EKELKQRNPE  | VRHVDLEIL   | -----      | -----      |
| znt9like_[E.Coli_partial]                      | -----       | -----      | -----      | -----       | -----       | -----      | -----      |
| znt9like_[Rhodanobacter_glycinis]              | -----       | -----      | -----      | RTLIDAINTV  | ERAMKAIEFGD | VRWSFFEPDV | -----      |
| znt9like_[Dyella_ginsengisoli]                 | -----       | -----      | -----      | RGLIDAINTV  | EAAMKAIEFGE | IRWSFFEPDV | -----      |
| znt9like2_[Actinobacteria_bacterium]           | -----       | -----      | -----      | AQLAQAIIDDA | EQQLRAAVPI  | ARTIYIEPDI | -----      |
| znt9like_[Firmicutes_bacterium]                | -----       | -----      | -----      | GEIIQAVDRV  | EKALREALPR  | VTRIYLEADG | -----      |
| znt9-like3_[Candidatus_Micrarchaeota_archaeon] | -----       | -----      | -----      | DQVEEAIKVV  | ERAVQALPS   | VKRIFVEAES | -----      |
| znt9like_[Mesorhizobium_sp._L2C054A000]        | -----       | -----      | -----      | PEIEACVERI  | EALLKKEPME  | IARLFVKPQT | -----      |
| znt9like_[Geopsychrobacter_electrodiphilus]    | -----       | -----      | -----      | LELEKTIGVI  | DLEIKRTWPN  | VKQVFIEAEA | -----      |
| znt9like_[Sneathiella_limimaris]               | -----       | -----      | -----      | ERAEOTISDL  | EKEIKSKHPF  | VKRLFIEVQS | -----      |
| znt9like_[Sneathiella_sp]                      | -----       | -----      | -----      | AEVEQTIISDL | ERRIKTEFPD  | IRRVFIEAQS | -----      |
| znt9like_[Sneathiella_chungangensis]           | -----       | -----      | -----      | TEVEAAISAL  | EIRVKETYPD  | VRVVFIEAQS | -----      |
| znt9like_[Leptolyngbya_foveolarum]             | -----       | -----      | -----      | DEIELAVRRI  | EKTIRANHTD  | VKRIFIEAAS | -----      |
| znt9like_[Massilia_sp._LC238]                  | -----       | -----      | -----      | DEVEQAIARI  | EAAVASHPV   | IRQIYFEASA | -----      |
| znt9like1_[Variovorax_paradoxus]               | -----       | -----      | -----      | GEAAEAIAAI  | ERQVRARFPM  | IKRLFIEASE | -----      |
| znt9like2_[Variovorax_paradoxus]               | -----       | -----      | -----      | GQAADAVAAI  | ESQVRARFPT  | IKRIFIEATD | -----      |
| znt9like_[Nitrosospira_sp._Nsp11]              | -----       | -----      | -----      | NELAEIVSRL  | ELAIQRYHPS  | IKRIFIEVAP | -----      |
| znt9like_[Sorangium_cellulosum]                | -----       | -----      | -----      | SGVAEAIERI  | ETRIRSERPD  | VKHIYVEARS | -----      |
| znt9like1_[Actinobacteria_bacterium]           | -----       | -----      | -----      | HEVHEAVHRV  | EDSIRQRFPE  | VTRIFIEVES | -----      |
| znt9like_[Phormidismis_priestleyi]             | -----       | -----      | -----      | EAVTQAIERL  | ESTIRSHYPD  | IRNIFVEAKS | -----      |
| znt9like1_[Nosdoc_punctiforme]                 | -----       | -----      | -----      | EEIALTVERL  | EIKIRQKHPE  | IKQIFIEAKS | -----      |
| znt9like2_[Nosdoc_punctiforme]                 | -----       | -----      | -----      | EEIALTVD    | -----       | -----      | -----      |
| znt9like_[Nostoc_calcicola]                    | -----       | -----      | -----      | EEIALTVESL  | EANIRQKHPE  | IKQIFIEAKS | -----      |
| znt9like_[Nostoc_commune]                      | -----       | -----      | -----      | EEIALTVESL  | EANIRQKHPE  | IKQIFIEAKS | -----      |
| znt9like_[Nostoc_piscinale]                    | -----       | -----      | -----      | EEIASTVDSL  | ESKIRKKHPE  | IKQIFIEAKS | -----      |



znt1\_[Mus\_musculus]  
znt1\_[Rattus\_norvegicus]  
znt1\_isoformG\_[Drosophila\_melanogaster]  
znt1\_isoformF\_[Drosophila\_melanogaster]  
znt1-like2\_[Hydra\_vulgaris]

```
----- YM----- QVAKTI KDVFH--NHG IHATTIQPEF  
----- YM----- QVAKTI KDVFH--NHG IHATTIQPEF  
----- YM----- KIAEKV KEFFH--NEG IHSTTIQPEF  
----- YM----- KIAEKV KEFFH--NEG IHSTTIQPEF  
----- YM----- TIANQL KEFFH--NEG IHSTTIQPEF
```







znt1\_[Mus\_musculus]  
znt1\_[Rattus\_norvegicus]  
znt1\_isoformG\_[Drosophila\_melanogaster]  
znt1\_isoformF\_[Drosophila\_melanogaster]  
znt1-like2\_[Hydra\_vulgaris]

|    |     |     |       |       |       |       |
|----|-----|-----|-------|-------|-------|-------|
| AS | VGS | KS  | ----- | ----- | ----- | ----- |
| AS | VGS | KS  | ----- | ----- | ----- | ----- |
| SE | IEG | CNM | SDGTS | ----- | ----- | ----- |
| SE | IEG | CNM | SDGTS | ----- | ----- | ----- |
| LH | GPN | IN  | ----- | ----- | ----- | ----- |

|                                                |       |       |       |       |       |
|------------------------------------------------|-------|-------|-------|-------|-------|
| znt4_human                                     | ----- | ----- | ----- | ----- | ----- |
| znt4_[Rattus_norvegicus]                       | ----- | ----- | ----- | ----- | ----- |
| znt4_isoforma_[Mus_musculus]                   | ----- | ----- | ----- | ----- | ----- |
| znt4_isoformb_[Mus_musculus]                   | ----- | ----- | ----- | ----- | ----- |
| znt8_human                                     | ----- | ----- | ----- | ----- | ----- |
| znt8_[Mus_musculus]                            | ----- | ----- | ----- | ----- | ----- |
| znt8_[Rattus_norvegicus]                       | ----- | ----- | ----- | ----- | ----- |
| znt3_human                                     | ----- | ----- | ----- | ----- | ----- |
| znt3_[Rattus_norvegicus]                       | ----- | ----- | ----- | ----- | ----- |
| znt3_isoform1_[Mus_musculus]                   | ----- | ----- | ----- | ----- | ----- |
| znt3_isoform2_[Mus_musculus]                   | ----- | ----- | ----- | ----- | ----- |
| znt2-like_[Hydra_vulgaris]                     | ----- | ----- | ----- | ----- | ----- |
| znt35C_[Drosophila_melanogaster]               | ----- | ----- | ----- | ----- | ----- |
| znt2_[Ciona_intestinalis]                      | ----- | ----- | ----- | ----- | ----- |
| znt8_[Danio_rerio]                             | ----- | ----- | ----- | ----- | ----- |
| znt2_[Danio_rerio]                             | ----- | ----- | ----- | ----- | ----- |
| znt3_isoformX1_[Danio_rerio]                   | ----- | ----- | ----- | ----- | ----- |
| znt2_human                                     | ----- | ----- | ----- | ----- | ----- |
| znt2_isoform1_[Mus_musculus]                   | ----- | ----- | ----- | ----- | ----- |
| znt2_isoform2_[Mus_musculus]                   | ----- | ----- | ----- | ----- | ----- |
| znt2_isoform1_[Rattus_norvegicus]              | ----- | ----- | ----- | ----- | ----- |
| znt2_isoform2_[Rattus_norvegicus]              | ----- | ----- | ----- | ----- | ----- |
| znt9-like_[Hydra_vulgaris]                     | ----- | ----- | ----- | ----- | ----- |
| znt9_[Drosophila_melanogaster]                 | ----- | ----- | ----- | ----- | ----- |
| znt9-like_[Ciona_intestinalis]                 | ----- | ----- | ----- | ----- | ----- |
| znt9_[Danio_rerio]                             | ----- | ----- | ----- | ----- | ----- |
| znt9_human                                     | ----- | ----- | ----- | ----- | ----- |
| znt9_[Rattus_norvegicus]                       | ----- | ----- | ----- | ----- | ----- |
| isoform1_znt9_[Mus_musculus]                   | ----- | ----- | ----- | ----- | ----- |
| isoform2_znt9_[Mus_musculus]                   | ----- | ----- | ----- | ----- | ----- |
| znt9like_[E.Coli_partial]                      | ----- | ----- | ----- | ----- | ----- |
| znt9like_[Rhodanobacter_glycinis]              | ----- | ----- | ----- | ----- | ----- |
| znt9like_[Dyella_ginsengisoli]                 | ----- | ----- | ----- | ----- | ----- |
| znt9like2_[Actinobacteria_bacterium]           | ----- | ----- | ----- | ----- | ----- |
| znt9like_[Firmicutes_bacterium]                | ----- | ----- | ----- | ----- | ----- |
| znt9-like3_[Candidatus_Micrarchaeota_archaeon] | ----- | ----- | ----- | ----- | ----- |
| znt9like_[Mesorhizobium_sp._L2C054A000]        | ----- | ----- | ----- | ----- | ----- |
| znt9like_[Geopsychrobacter_electrodiphilus]    | ----- | ----- | ----- | ----- | ----- |
| znt9like_[Sneathiella_limimaris]               | ----- | ----- | ----- | ----- | ----- |
| znt9like_[Sneathiella_sp]                      | ----- | ----- | ----- | ----- | ----- |
| znt9like_[Sneathiella_chungangensis]           | ----- | ----- | ----- | ----- | ----- |
| znt9like_[Leptolyngbya_foveolarum]             | ----- | ----- | ----- | ----- | ----- |
| znt9like_[Massilia_sp._LC238]                  | ----- | ----- | ----- | ----- | ----- |
| znt9like1_[Variovorax_paradoxus]               | ----- | ----- | ----- | ----- | ----- |
| znt9like2_[Variovorax_paradoxus]               | ----- | ----- | ----- | ----- | ----- |
| znt9like_[Nitrosospira_sp._Nsp11]              | ----- | ----- | ----- | ----- | ----- |
| znt9like_[Sorangium_cellulosum]                | ----- | ----- | ----- | ----- | ----- |
| znt9like1_[Actinobacteria_bacterium]           | ----- | ----- | ----- | ----- | ----- |
| znt9like_[Phormidesmis_priestleyi]             | ----- | ----- | ----- | ----- | ----- |
| znt9like1_[Nosdoc_punctiforme]                 | ----- | ----- | ----- | ----- | ----- |
| znt9like2_[Nosdoc_punctiforme]                 | ----- | ----- | ----- | ----- | ----- |
| znt9like_[Nostoc_calcicola]                    | ----- | ----- | ----- | ----- | ----- |
| znt9like_[Nostoc_commune]                      | ----- | ----- | ----- | ----- | ----- |
| znt9like_[Nostoc_piscinale]                    | ----- | ----- | ----- | ----- | ----- |

|                                                                         |     |                   |   |           |
|-------------------------------------------------------------------------|-----|-------------------|---|-----------|
| znt9like_[Nostoc_cycadae]                                               |     |                   |   |           |
| znt9like_[Myxosarcina_sp._GI1]                                          |     | NSLNKT            |   |           |
| znt9like_[Chondrocystis_sp._NIES-4102]                                  |     |                   |   |           |
| znt9like_[Pleurocapsa_sp._PCC_7319]                                     |     |                   |   |           |
| znt33D_[Drosophila_melanogaster]                                        |     |                   |   |           |
| transporter_[Pleurocapsa_sp._PCC_7319]                                  |     |                   |   |           |
| transporter_[Leptolyngbya_foveolarum]                                   |     |                   |   |           |
| transporter_[Myxosarcina_sp._GI1]                                       |     |                   |   |           |
| transporter_[Chondrocystis_sp._NIES-4102]                               |     |                   |   |           |
| transporter_[Phormidesmis_priestleyi]                                   |     |                   |   |           |
| transporter_[Nostoc_piscinale]                                          |     |                   |   |           |
| transporter_[Nostoc_punctiforme]                                        |     |                   |   |           |
| transporter_[Nostoc_caldicola]                                          |     |                   |   |           |
| cationtransporter3_[Firmicutes_bacterium]                               |     |                   |   |           |
| c.e.p_[Firmicutes_bacterium]                                            |     |                   |   |           |
| cationtransporter1_[Firmicutes_bacterium]                               |     |                   |   |           |
| cationtransporter2_[Firmicutes_bacterium]                               |     |                   |   |           |
| cationtransporter1_[Actinobacteria_bacterium]                           |     |                   |   |           |
| cationtransporter2_[Actinobacteria_bacterium]                           |     |                   |   |           |
| c.e.p_[Candidatus_Woeseearchaeota_archaeon_CG08_land_8_20_14_0_20_43_7] |     |                   |   |           |
| transporter_[E.Coli]                                                    |     |                   |   |           |
| znt9-like2_[Candidatus_Micrarchaeota_archaeon]                          | GPE |                   | G | MCICP--KC |
| znt9-like_[Candidatus_Pacearchaeota_archaeon]                           | GPE |                   | G | YCVCP--KC |
| znt9-like_[Candidatus_Aenigmarchaeota_archaeon_ex4484_52]               | GPE |                   | G | YCVCP--KC |
| znt9-likel1_[Candidatus_Micrarchaeota_archaeon]                         |     |                   |   |           |
| znt9-like4_[Candidatus_Micrarchaeota_archaeon]                          |     |                   |   |           |
| znt9-like_[Candidatus_Woeseearchaeota_archaeon]                         |     |                   |   |           |
| znt7_[Drosophila_melanogaster]                                          |     |                   |   |           |
| znt7_[Danio_rerio]                                                      |     |                   |   |           |
| znt7_human                                                              |     |                   |   |           |
| znt7_[Mus_musculus]                                                     |     |                   |   |           |
| znt7_[Rattus_norvegicus]                                                |     |                   |   |           |
| znt5-like_[Ciona_intestinalis]                                          |     |                   |   |           |
| znt5_[Danio_rerio]                                                      | GIS |                   |   |           |
| znt5_human                                                              | QME |                   |   |           |
| znt5_[Mus_musculus]                                                     | QME |                   |   |           |
| znt5_[Rattus_norvegicus]                                                | QME |                   |   |           |
| znt6_[Ciona_intestinalis]                                               | QME |                   |   |           |
| znt6_[Danio_rerio]                                                      | GSK | PS S A SSS        |   | I         |
| znt6_human                                                              | GSE | PT PATSTPAKPS SPP |   | P         |
| znt6_[Rattus_norvegicus]                                                | TDD | LN PVTSTPAKPS SPP |   | P         |
| znt6_isoform1_[Mus_musculus]                                            | NDE | RT PVTSTPAKPS SPP |   | P         |
| znt6_isoform2_[Mus_musculus]                                            | VDE | RT PVTSTPAKPS SPP |   | P         |
| znt4_[Danio_rerio]                                                      | VDE | RT PVTSTPAKPS SPP |   | P         |
| cationtransporter1_[Candidatus_Micrarchaeota_archaeon]                  |     |                   |   |           |
| transporter_[Geopsychrobacter_electrodiphilus]                          |     |                   |   |           |
| cationtransporter2_[Candidatus_Micrarchaeota_archaeon]                  |     |                   |   |           |
| znt10_[Danio_rerio]                                                     |     |                   |   | DADSSC    |
| znt10_human                                                             |     |                   |   | DLLLLC    |
| znt10_[Mus_musculus]                                                    |     |                   |   | DFLLTC    |
| znt10_[Rattus_norvegicus]                                               |     |                   |   | DFLPTC    |
| znt1-likel1_[Hydra_vulgaris]                                            |     |                   |   | ILKQC     |
| znt1_[Ciona_intestinalis]                                               |     |                   |   | C         |
| znt1a_[Danio_rerio]                                                     |     |                   |   | RASLC     |
| znt1_human                                                              |     |                   |   | SVVPC     |





|                                                                         |                 |                       |                     |                                       |
|-------------------------------------------------------------------------|-----------------|-----------------------|---------------------|---------------------------------------|
| znt9like_[Nostoc_cycadae]                                               | -----           | -----                 | -----               | -----                                 |
| znt9like_[Myxosarcina_sp._GI1]                                          | -----           | -----                 | -----               | -----                                 |
| znt9like_[Chondrocystis_sp._NIES-4102]                                  | -----           | -----                 | -----               | -----                                 |
| znt9like_[Pleurocapsa_sp._PCC_7319]                                     | -----           | -----                 | -----               | -----                                 |
| znt33D_[Drosophila_melanogaster]                                        | -----           | -----                 | -----               | -----                                 |
| transporter_[Pleurocapsa_sp._PCC_7319]                                  | -----           | -----                 | -----               | -----                                 |
| transporter_[Leptolyngbya_foveolarum]                                   | -----           | -----                 | -----               | -----                                 |
| transporter_[Myxosarcina_sp._GI1]                                       | -----           | -----                 | -----               | -----                                 |
| transporter_[Chondrocystis_sp._NIES-4102]                               | -----           | -----                 | -----               | -----                                 |
| transporter_[Phormidesmis_priestleyi]                                   | -----           | -----                 | -----               | -----                                 |
| transporter_[Nostoc_piscinale]                                          | -----           | -----                 | -----               | -----                                 |
| transporter_[Nosdoc_punctiforme]                                        | -----           | -----                 | -----               | -----                                 |
| transporter_[Nostoc_caldicola]                                          | -----           | -----                 | -----               | -----                                 |
| cationtransporter3_[Firmicutes_bacterium]                               | -----           | -----                 | -----               | -----                                 |
| c.e.p_[Firmicutes_bacterium]                                            | -----           | -----                 | -----               | -----                                 |
| cationtransporter1_[Firmicutes_bacterium]                               | -----           | -----                 | -----               | -----                                 |
| cationtransporter2_[Firmicutes_bacterium]                               | -----           | -----                 | -----               | -----                                 |
| cationtransporter1_[Actinobacteria_bacterium]                           | -----           | -----                 | -----               | -----                                 |
| cationtransporter2_[Actinobacteria_bacterium]                           | -----           | -----                 | -----               | -----                                 |
| c.e.p_[Candidatus_Woeseearchaeota_archaeon_CG08_land_8_20_14_0_20_43_7] | -----           | -----                 | -----               | -----                                 |
| transporter_[E.Coli]                                                    | -----           | -----                 | -----               | -----                                 |
| znt9-like2_[Candidatus_Micrarchaeota_archaeon]                          | G Y E Q P H E R | G V P C P E V K C P   | K                   | C                                     |
| znt9-like_[Candidatus_Pacearchaeota_archaeon]                           | G Y K Q K H E K | G I P C S K I K C P   | K                   | C                                     |
| znt9-like_[Candidatus_Aenigmarchaeota_archaeon_ex4484_52]               | K H R Q K H K K | G I P C S T I K C P   | L                   | C                                     |
| znt9-likel1_[Candidatus_Micrarchaeota_archaeon]                         | -----           | -----                 | -----               | -----                                 |
| znt9-like4_[Candidatus_Micrarchaeota_archaeon]                          | -----           | -----                 | -----               | -----                                 |
| znt9-like_[Candidatus_Woeseearchaeota_archaeon]                         | -----           | -----                 | -----               | -----                                 |
| znt7_[Drosophila_melanogaster]                                          | -----           | -----                 | -----               | -----                                 |
| znt7_[Danio_rerio]                                                      | -----           | -----                 | -----               | -----                                 |
| znt7_human                                                              | -----           | -----                 | -----               | -----                                 |
| znt7_[Mus_musculus]                                                     | -----           | -----                 | -----               | -----                                 |
| znt7_[Rattus_norvegicus]                                                | -----           | -----                 | -----               | -----                                 |
| znt5-like_[Ciona_intestinalis]                                          | -----           | L N Q S S D S E G E F | T K L I             | -----                                 |
| znt5_[Danio_rerio]                                                      | -----           | S M K Y Y K D G T C   | I M                 | -----                                 |
| znt5_human                                                              | -----           | S M K Y C K D G T Y   | I M                 | -----                                 |
| znt5_[Mus_musculus]                                                     | -----           | S L K Y C K D G T Y   | I M                 | -----                                 |
| znt5_[Rattus_norvegicus]                                                | -----           | S M K Y C K D G T Y   | I M                 | -----                                 |
| znt6_[Ciona_intestinalis]                                               | I Y G F N       | K P A A A V A         | P M P H N P         | S K Y T T T I A E K K S A D D F S F A |
| znt6_[Danio_rerio]                                                      | E F S F H       | T P G R H V Q         | P V V F Q T A H P   | H R P L Y G                           |
| znt6_human                                                              | E F S F N       | T P G K N V N         | P V I L L N T Q T   | R P Y G F G L N H G H T P Y S S M L N |
| znt6_[Rattus_norvegicus]                                                | E F A F N       | T P G K N V S         | P V I L L N T Q T   | R P Y G L G L N R G H T P Y S S M F S |
| znt6_isoform1_[Mus_musculus]                                            | E F S F N       | T P G K N V S         | P V I L L N T Q T   | R P Y S L G L N R G H T P Y S S V F S |
| znt6_isoform2_[Mus_musculus]                                            | E F S F N       | T P G K N V S         | P V I L L N T Q T   | R P Y S L G L N R G H T P Y S S V F S |
| znt4_[Danio_rerio]                                                      | -----           | -----                 | -----               | -----                                 |
| cationtransporter1_[Candidatus_Micrarchaeota_archaeon]                  | -----           | -----                 | -----               | -----                                 |
| transporter_[Geopsychrobacter_electrodiphilus]                          | -----           | -----                 | -----               | -----                                 |
| cationtransporter2_[Candidatus_Micrarchaeota_archaeon]                  | -----           | -----                 | -----               | -----                                 |
| znt10_[Danio_rerio]                                                     | S A P C L       | S S S C Q K L S C C   | P A G P V C V C A P | P R D S S T E K H T P Q A C T H S     |
| znt10_human                                                             | N S P C I       | T K G C A K Q L C C   | P P G A L P L A H V | N G C A E H N G G P S L D T Y G S     |
| znt10_[Mus_musculus]                                                    | S A P C I       | S Q S C A K K L C C   | P P G T L P L A L V | N G C A E H N G R S S R E S Y R S     |
| znt10_[Rattus_norvegicus]                                               | S A P C I       | S Q S C A K K L C C   | P P G T L P L A L V | N G C A E H N G G P N L E S Y R S     |
| znt1-likel1_[Hydra_vulgaris]                                            | F N K C N       | K E N C L E S M C C   | D T M N N A N P N C | S N V L S K T I E T D S Q             |
| znt1_[Ciona_intestinalis]                                               | V M V C N       | T N S C K T K R C C   | S V N D V P T L A K | N P S K S P C T S P                   |
| znt1a_[Danio_rerio]                                                     | E L S C         | R T Q C A P K L C C   | G A V D T A K P L E | G S L E S K K S C E S K T             |
| znt1_human                                                              | E L A C         | R T Q C A L K Q C C   | G T L P Q A P S G K | D A E K T                             |

znt1\_[Mus\_musculus]  
znt1\_[Rattus\_norvegicus]  
znt1\_isoformG\_[Drosophila\_melanogaster]  
znt1\_isoformF\_[Drosophila\_melanogaster]  
znt1-like2\_[Hydra\_vulgaris]

|       |       |            |            |      |       |           |    |
|-------|-------|------------|------------|------|-------|-----------|----|
| ELAC  | ----- | RTQCALKQCC | GTRPQVHSGK | DAE  | ----- | -----     | KA |
| ELAC  | ----- | RTQCALKQCC | GTRPQVHSGK | EAE  | ----- | -----     | KA |
| ALDCP | --TT  | EEGCVKATCC | QNNNKLNQLP | SPTN | ----- | SPYLCRQRN |    |
| ALDCP | --TT  | EEGCVKATCC | QNNNKLNQLP | SPTN | ----- | SPYLCRQRN |    |
| ILEC  | ----- | KEDCAERTCC | GEKDGNES-P | NQ   | ----- | LVKANQ    |    |

|                                                |       |       |       |       |       |
|------------------------------------------------|-------|-------|-------|-------|-------|
| znt4_human                                     | ----- | ----- | ----- | ----- | ----- |
| znt4_[Rattus_norvegicus]                       | ----- | ----- | ----- | ----- | ----- |
| znt4_isoforma_[Mus_musculus]                   | ----- | ----- | ----- | ----- | ----- |
| znt4_isoformb_[Mus_musculus]                   | ----- | ----- | ----- | ----- | ----- |
| znt8_human                                     | ----- | ----- | ----- | ----- | ----- |
| znt8_[Mus_musculus]                            | ----- | ----- | ----- | ----- | ----- |
| znt8_[Rattus_norvegicus]                       | ----- | ----- | ----- | ----- | ----- |
| znt3_human                                     | ----- | ----- | ----- | ----- | ----- |
| znt3_[Rattus_norvegicus]                       | ----- | ----- | ----- | ----- | ----- |
| znt3_isoform1_[Mus_musculus]                   | ----- | ----- | ----- | ----- | ----- |
| znt3_isoform2_[Mus_musculus]                   | ----- | ----- | ----- | ----- | ----- |
| znt2-like_[Hydra_vulgaris]                     | ----- | ----- | ----- | ----- | ----- |
| znt35C_[Drosophila_melanogaster]               | ----- | ----- | ----- | ----- | ----- |
| znt2_[Ciona_intestinalis]                      | ----- | ----- | ----- | ----- | ----- |
| znt8_[Danio_rerio]                             | ----- | ----- | ----- | ----- | ----- |
| znt2_[Danio_rerio]                             | ----- | ----- | ----- | ----- | ----- |
| znt3_isoformX1_[Danio_rerio]                   | ----- | ----- | ----- | ----- | ----- |
| znt2_human                                     | ----- | ----- | ----- | ----- | ----- |
| znt2_isoform1_[Mus_musculus]                   | ----- | ----- | ----- | ----- | ----- |
| znt2_isoform2_[Mus_musculus]                   | ----- | ----- | ----- | ----- | ----- |
| znt2_isoform1_[Rattus_norvegicus]              | ----- | ----- | ----- | ----- | ----- |
| znt2_isoform2_[Rattus_norvegicus]              | ----- | ----- | ----- | ----- | ----- |
| znt9-like_[Hydra_vulgaris]                     | ----- | ----- | ----- | ----- | ----- |
| znt9_[Drosophila_melanogaster]                 | ----- | ----- | ----- | ----- | ----- |
| znt9-like_[Ciona_intestinalis]                 | ----- | ----- | ----- | ----- | ----- |
| znt9_[Danio_rerio]                             | ----- | ----- | ----- | ----- | ----- |
| znt9_human                                     | ----- | ----- | ----- | ----- | ----- |
| znt9_[Rattus_norvegicus]                       | ----- | ----- | ----- | ----- | ----- |
| isoform1_znt9_[Mus_musculus]                   | ----- | ----- | ----- | ----- | ----- |
| isoform2_znt9_[Mus_musculus]                   | ----- | ----- | ----- | ----- | ----- |
| znt9like_[E.Coli_partial]                      | ----- | ----- | ----- | ----- | ----- |
| znt9like_[Rhodanobacter_glycinis]              | ----- | ----- | ----- | ----- | ----- |
| znt9like_[Dyella_ginsengisoli]                 | ----- | ----- | ----- | ----- | ----- |
| znt9like2_[Actinobacteria_bacterium]           | ----- | ----- | ----- | ----- | ----- |
| znt9like_[Firmicutes_bacterium]                | ----- | ----- | ----- | ----- | ----- |
| znt9-like3_[Candidatus_Micrarchaeota_archaeon] | ----- | ----- | ----- | ----- | ----- |
| znt9like_[Mesorhizobium_sp._L2C054A000]        | ----- | ----- | ----- | ----- | ----- |
| znt9like_[Geopsychrobacter_electrodiphilus]    | ----- | ----- | ----- | ----- | ----- |
| znt9like_[Sneathiella_limimaris]               | ----- | ----- | ----- | ----- | ----- |
| znt9like_[Sneathiella_sp]                      | ----- | ----- | ----- | ----- | ----- |
| znt9like_[Sneathiella_chungangensis]           | ----- | ----- | ----- | ----- | ----- |
| znt9like_[Leptolyngbya_foveolarum]             | ----- | ----- | ----- | ----- | ----- |
| znt9like_[Massilia_sp._LC238]                  | ----- | ----- | ----- | ----- | ----- |
| znt9like1_[Variovorax_paradoxus]               | ----- | ----- | ----- | ----- | ----- |
| znt9like2_[Variovorax_paradoxus]               | ----- | ----- | ----- | ----- | ----- |
| znt9like_[Nitrosospira_sp._Nsp11]              | ----- | ----- | ----- | ----- | ----- |
| znt9like_[Sorangium_cellulosum]                | ----- | ----- | ----- | ----- | ----- |
| znt9like1_[Actinobacteria_bacterium]           | ----- | ----- | ----- | ----- | ----- |
| znt9like_[Phormidesmis_priestleyi]             | ----- | ----- | ----- | ----- | ----- |
| znt9like1_[Nosdoc_punctiforme]                 | ----- | ----- | ----- | ----- | ----- |
| znt9like2_[Nosdoc_punctiforme]                 | ----- | ----- | ----- | ----- | ----- |
| znt9like_[Nostoc_calcicola]                    | ----- | ----- | ----- | ----- | ----- |
| znt9like_[Nostoc_commune]                      | ----- | ----- | ----- | ----- | ----- |
| znt9like_[Nostoc_piscinale]                    | ----- | ----- | ----- | ----- | ----- |



|                                                                         |            |            |           |            |
|-------------------------------------------------------------------------|------------|------------|-----------|------------|
| znt9like_[Nostoc_cycadae]                                               | -----      | -----      | -----     | -----      |
| znt9like_[Myxosarcina_sp._GI1]                                          | -----      | -----      | -----     | -----      |
| znt9like_[Chondrocystis_sp._NIES-4102]                                  | -----      | -----      | -----     | -----      |
| znt9like_[Pleurocapsa_sp._PCC_7319]                                     | -----      | -----      | -----     | -----      |
| znt33D_[Drosophila_melanogaster]                                        | -----      | -----      | -----     | -----      |
| transporter_[Pleurocapsa_sp._PCC_7319]                                  | -----      | -----      | -----     | -----      |
| transporter_[Leptolyngbya_foveolarum]                                   | -----      | -----      | -----     | -----      |
| transporter_[Myxosarcina_sp._GI1]                                       | -----      | -----      | -----     | -----      |
| transporter_[Chondrocystis_sp._NIES-4102]                               | -----      | -----      | -----     | -----      |
| transporter_[Phormidesmis_priestleyi]                                   | -----      | -----      | -----     | -----      |
| transporter_[Nostoc_piscinale]                                          | -----      | -----      | -----     | -----      |
| transporter_[Nosdoc_punctiforme]                                        | -----      | -----      | -----     | -----      |
| transporter_[Nostoc_caldicola]                                          | -----      | -----      | -----     | -----      |
| cationtransporter3_[Firmicutes_bacterium]                               | -----      | -----      | -----     | -----      |
| c.e.p_[Firmicutes_bacterium]                                            | -----      | -----      | -----     | -----      |
| cationtransporter1_[Firmicutes_bacterium]                               | -----      | -----      | -----     | -----      |
| cationtransporter2_[Firmicutes_bacterium]                               | -----      | -----      | -----     | -----      |
| cationtransporter1_[Actinobacteria_bacterium]                           | -----      | -----      | -----     | -----      |
| cationtransporter2_[Actinobacteria_bacterium]                           | -----      | -----      | -----     | -----      |
| c.e.p_[Candidatus_Woeseearchaeota_archaeon_CG08_land_8_20_14_0_20_43_7] | -----      | -----      | -----     | -----      |
| transporter_[E.Coli]                                                    | -----      | -----      | -----     | -----      |
| znt9-like2_[Candidatus_Micrarchaeota_archaeon]                          | -----      | GTAMIR     | K         | KE         |
| znt9-like_[Candidatus_Pacearchaeota_archaeon]                           | -----      | KIPLER     | K         |            |
| znt9-like_[Candidatus_Aenigmarchaeota_archaeon_ex4484_52]               | -----      | GKNLKR     | E         |            |
| znt9-likel1_[Candidatus_Micrarchaeota_archaeon]                         | -----      | -----      | -----     | -----      |
| znt9-like4_[Candidatus_Micrarchaeota_archaeon]                          | -----      | -----      | -----     | -----      |
| znt9-like_[Candidatus_Woeseearchaeota_archaeon]                         | -----      | -----      | -----     | -----      |
| znt7_[Drosophila_melanogaster]                                          | -----      | -----      | -----     | -----      |
| znt7_[Danio_rerio]                                                      | -----      | -----      | -----     | -----      |
| znt7_human                                                              | -----      | -----      | -----     | -----      |
| znt7_[Mus_musculus]                                                     | -----      | -----      | -----     | -----      |
| znt7_[Rattus_norvegicus]                                                | -----      | -----      | -----     | -----      |
| znt5-like_[Ciona_intestinalis]                                          | -----      | -----      | -----     | -----      |
| znt5_[Danio_rerio]                                                      | -----      | -----      | -----     | -----      |
| znt5_human                                                              | -----      | -----      | -----     | -----      |
| znt5_[Mus_musculus]                                                     | -----      | -----      | -----     | -----      |
| znt5_[Rattus_norvegicus]                                                | -----      | -----      | -----     | -----      |
| znt6_[Ciona_intestinalis]                                               | PTKSKPQIKS | L--APPSAGS | -----     | --NIARMYKA |
| znt6_[Danio_rerio]                                                      | -----G     | L--QGPGVRL | GLG-----P | RGPTLQAYRT |
| znt6_human                                                              | -----QG    | L--GVPGIGA | TQG-----L | -----RTG   |
| znt6_[Rattus_norvegicus]                                                | -----QG    | L--AFPGVGA | GQG-----L | -----RPT   |
| znt6_isoform1_[Mus_musculus]                                            | -----QG    | L--AFPGVGA | GQG-----L | -----RPT   |
| znt6_isoform2_[Mus_musculus]                                            | -----QG    | L--AFPGVGA | GQG-----L | -----RPT   |
| znt4_[Danio_rerio]                                                      | -----      | -----      | -----     | -----      |
| cationtransporter1_[Candidatus_Micrarchaeota_archaeon]                  | -----      | -----      | -----     | -----      |
| transporter_[Geopsychrobacter_electrodiphilus]                          | -----      | -----      | -----     | -----      |
| cationtransporter2_[Candidatus_Micrarchaeota_archaeon]                  | -----      | -----      | -----     | -----      |
| znt10_[Danio_rerio]                                                     | SKL        | -----      | -----     | -----      |
| znt10_human                                                             | DGLS       | -----R     | -----R    | DAREVAIEVS |
| znt10_[Mus_musculus]                                                    | -----      | -----      | -----I    | EAEVAID--  |
| znt10_[Rattus_norvegicus]                                               | -----      | -----      | -----I    | EAEVVIDVA  |
| znt1-likel1_[Hydra_vulgaris]                                            | -----GNDIS | VRIAS-SSSK | T-D-----L | HLPNENN    |
| znt1_[Ciona_intestinalis]                                               | TVTEVDETN  | LALIPRSPST | TS-----   | NVFT       |
| znt1a_[Danio_rerio]                                                     | PTLPSASVTS | LEIISSEVED | T-S-----  | RPESVVII   |
| znt1_human                                                              | PAVSISC    | LELSN-NLEK | K-PRRTKAE | NIPAVVIEIK |
|                                                                         | -----      | -----      | -----     | --NMP      |

znt1\_[Mus\_musculus]  
znt1\_[Rattus\_norvegicus]  
znt1\_isoformG\_[Drosophila\_melanogaster]  
znt1\_isoformF\_[Drosophila\_melanogaster]  
znt1-like2\_[Hydra\_vulgaris]

|            |            |            |            |            |           |
|------------|------------|------------|------------|------------|-----------|
| ---        | PTVSISC    | LELSE-NLEK | K-ARRTKAEG | SLPAVVIEIK | --NVP---- |
| ---        | PTVSISC    | LELSE-NLEK | K-PRRTKAEG | SVPAVVIEIK | --NVP---- |
| AARQAGDVEA | GSLLEATSSG | NQGATGGAST | GAPVAAIGAT | --STPK--SD |           |
| AARQAGDVEA | GSLLEATSSG | NQGATGGAST | GAPVAAIGAT | --STPK--SD |           |
| AAL-AT---- | -----      | -----      | -----      | -----      |           |

|                                                |       |       |       |       |       |
|------------------------------------------------|-------|-------|-------|-------|-------|
| znt4_human                                     | ----- | ----- | ----- | ----- | ----- |
| znt4_[Rattus_norvegicus]                       | ----- | ----- | ----- | ----- | ----- |
| znt4_isoforma_[Mus_musculus]                   | ----- | ----- | ----- | ----- | ----- |
| znt4_isoformb_[Mus_musculus]                   | ----- | ----- | ----- | ----- | ----- |
| znt8_human                                     | ----- | ----- | ----- | ----- | ----- |
| znt8_[Mus_musculus]                            | ----- | ----- | ----- | ----- | ----- |
| znt8_[Rattus_norvegicus]                       | ----- | ----- | ----- | ----- | ----- |
| znt3_human                                     | ----- | ----- | ----- | ----- | ----- |
| znt3_[Rattus_norvegicus]                       | ----- | ----- | ----- | ----- | ----- |
| znt3_isoform1_[Mus_musculus]                   | ----- | ----- | ----- | ----- | ----- |
| znt3_isoform2_[Mus_musculus]                   | ----- | ----- | ----- | ----- | ----- |
| znt2-like_[Hydra_vulgaris]                     | ----- | ----- | ----- | ----- | ----- |
| znt35C_[Drosophila_melanogaster]               | ----- | ----- | ----- | ----- | ----- |
| znt2_[Ciona_intestinalis]                      | ----- | ----- | ----- | ----- | ----- |
| znt8_[Danio_rerio]                             | ----- | ----- | ----- | ----- | ----- |
| znt2_[Danio_rerio]                             | ----- | ----- | ----- | ----- | ----- |
| znt3_isoformX1_[Danio_rerio]                   | ----- | ----- | ----- | ----- | ----- |
| znt2_human                                     | ----- | ----- | ----- | ----- | ----- |
| znt2_isoform1_[Mus_musculus]                   | ----- | ----- | ----- | ----- | ----- |
| znt2_isoform2_[Mus_musculus]                   | ----- | ----- | ----- | ----- | ----- |
| znt2_isoform1_[Rattus_norvegicus]              | ----- | ----- | ----- | ----- | ----- |
| znt2_isoform2_[Rattus_norvegicus]              | ----- | ----- | ----- | ----- | ----- |
| znt9-like_[Hydra_vulgaris]                     | ----- | ----- | ----- | ----- | ----- |
| znt9_[Drosophila_melanogaster]                 | ----- | ----- | ----- | ----- | ----- |
| znt9-like_[Ciona_intestinalis]                 | ----- | ----- | ----- | ----- | ----- |
| znt9_[Danio_rerio]                             | ----- | ----- | ----- | ----- | ----- |
| znt9_human                                     | ----- | ----- | ----- | ----- | ----- |
| znt9_[Rattus_norvegicus]                       | ----- | ----- | ----- | ----- | ----- |
| isoform1_znt9_[Mus_musculus]                   | ----- | ----- | ----- | ----- | ----- |
| isoform2_znt9_[Mus_musculus]                   | ----- | ----- | ----- | ----- | ----- |
| znt9like_[E.Coli_partial]                      | ----- | ----- | ----- | ----- | ----- |
| znt9like_[Rhodanobacter_glycinis]              | ----- | ----- | ----- | ----- | ----- |
| znt9like_[Dyella_ginsengisoli]                 | ----- | ----- | ----- | ----- | ----- |
| znt9like2_[Actinobacteria_bacterium]           | ----- | ----- | ----- | ----- | ----- |
| znt9like_[Firmicutes_bacterium]                | ----- | ----- | ----- | ----- | ----- |
| znt9-like3_[Candidatus_Micrarchaeota_archaeon] | ----- | ----- | ----- | ----- | ----- |
| znt9like_[Mesorhizobium_sp._L2C054A000]        | ----- | ----- | ----- | ----- | ----- |
| znt9like_[Geopsychrobacter_electrodiphilus]    | ----- | ----- | ----- | ----- | ----- |
| znt9like_[Sneathiella_limimaris]               | ----- | ----- | ----- | ----- | ----- |
| znt9like_[Sneathiella_sp]                      | ----- | ----- | ----- | ----- | ----- |
| znt9like_[Sneathiella_chungangensis]           | ----- | ----- | ----- | ----- | ----- |
| znt9like_[Leptolyngbya_foveolarum]             | ----- | ----- | ----- | ----- | ----- |
| znt9like_[Massilia_sp._LC238]                  | ----- | ----- | ----- | ----- | ----- |
| znt9like1_[Variovorax_paradoxus]               | ----- | ----- | ----- | ----- | ----- |
| znt9like2_[Variovorax_paradoxus]               | ----- | ----- | ----- | ----- | ----- |
| znt9like_[Nitrosospira_sp._Nsp11]              | ----- | ----- | ----- | ----- | ----- |
| znt9like_[Sorangium_cellulosum]                | ----- | ----- | ----- | ----- | ----- |
| znt9like1_[Actinobacteria_bacterium]           | ----- | ----- | ----- | ----- | ----- |
| znt9like_[Phormidesmis_priestleyi]             | ----- | ----- | ----- | ----- | ----- |
| znt9like1_[Nosdoc_punctiforme]                 | ----- | ----- | ----- | ----- | ----- |
| znt9like2_[Nosdoc_punctiforme]                 | ----- | ----- | ----- | ----- | ----- |
| znt9like_[Nostoc_calcicola]                    | ----- | ----- | ----- | ----- | ----- |
| znt9like_[Nostoc_commune]                      | ----- | ----- | ----- | ----- | ----- |
| znt9like_[Nostoc_piscinale]                    | ----- | ----- | ----- | ----- | ----- |



znt1\_[Mus\_musculus]  
znt1\_[Rattus\_norvegicus]  
znt1\_isoformG\_[Drosophila\_melanogaster]  
znt1\_isoformF\_[Drosophila\_melanogaster]  
znt1-like2\_[Hydra\_vulgaris]

```
---NKQ---PE---SSL-----  
---NKQ---PE---SSL-----  
L-V-----  
L-VXRQ---PH---QAQQHVHFAT---TKTETATATT---KAATTAAATS---IRDIMYEPRA---  
-----
```

|                                                |       |       |       |       |       |
|------------------------------------------------|-------|-------|-------|-------|-------|
| znt4_human                                     | ----- | ----- | ----- | ----- | ----- |
| znt4_[Rattus_norvegicus]                       | ----- | ----- | ----- | ----- | ----- |
| znt4_isoforma_[Mus_musculus]                   | ----- | ----- | ----- | ----- | ----- |
| znt4_isoformb_[Mus_musculus]                   | ----- | ----- | ----- | ----- | ----- |
| znt8_human                                     | ----- | ----- | ----- | ----- | ----- |
| znt8_[Mus_musculus]                            | ----- | ----- | ----- | ----- | ----- |
| znt8_[Rattus_norvegicus]                       | ----- | ----- | ----- | ----- | ----- |
| znt3_human                                     | ----- | ----- | ----- | ----- | ----- |
| znt3_[Rattus_norvegicus]                       | ----- | ----- | ----- | ----- | ----- |
| znt3_isoform1_[Mus_musculus]                   | ----- | ----- | ----- | ----- | ----- |
| znt3_isoform2_[Mus_musculus]                   | ----- | ----- | ----- | ----- | ----- |
| znt2-like_[Hydra_vulgaris]                     | ----- | ----- | ----- | ----- | ----- |
| znt35C_[Drosophila_melanogaster]               | ----- | ----- | ----- | ----- | ----- |
| znt2_[Ciona_intestinalis]                      | ----- | ----- | ----- | ----- | ----- |
| znt8_[Danio_rerio]                             | ----- | ----- | ----- | ----- | ----- |
| znt2_[Danio_rerio]                             | ----- | ----- | ----- | ----- | ----- |
| znt3_isoformX1_[Danio_rerio]                   | ----- | ----- | ----- | ----- | ----- |
| znt2_human                                     | ----- | ----- | ----- | ----- | ----- |
| znt2_isoform1_[Mus_musculus]                   | ----- | ----- | ----- | ----- | ----- |
| znt2_isoform2_[Mus_musculus]                   | ----- | ----- | ----- | ----- | ----- |
| znt2_isoform1_[Rattus_norvegicus]              | ----- | ----- | ----- | ----- | ----- |
| znt2_isoform2_[Rattus_norvegicus]              | ----- | ----- | ----- | ----- | ----- |
| znt9-like_[Hydra_vulgaris]                     | ----- | ----- | ----- | ----- | ----- |
| znt9_[Drosophila_melanogaster]                 | ----- | ----- | ----- | ----- | ----- |
| znt9-like_[Ciona_intestinalis]                 | ----- | ----- | ----- | ----- | ----- |
| znt9_[Danio_rerio]                             | ----- | ----- | ----- | ----- | ----- |
| znt9_human                                     | ----- | ----- | ----- | ----- | ----- |
| znt9_[Rattus_norvegicus]                       | ----- | ----- | ----- | ----- | ----- |
| isoform1_znt9_[Mus_musculus]                   | ----- | ----- | ----- | ----- | ----- |
| isoform2_znt9_[Mus_musculus]                   | ----- | ----- | ----- | ----- | ----- |
| znt9like_[E.Coli_partial]                      | ----- | ----- | ----- | ----- | ----- |
| znt9like_[Rhodanobacter_glycinis]              | ----- | ----- | ----- | ----- | ----- |
| znt9like_[Dyella_ginsengisoli]                 | ----- | ----- | ----- | ----- | ----- |
| znt9like2_[Actinobacteria_bacterium]           | ----- | ----- | ----- | ----- | ----- |
| znt9like_[Firmicutes_bacterium]                | ----- | ----- | ----- | ----- | ----- |
| znt9-like3_[Candidatus_Micrarchaeota_archaeon] | ----- | ----- | ----- | ----- | ----- |
| znt9like_[Mesorhizobium_sp._L2C054A000]        | ----- | ----- | ----- | ----- | ----- |
| znt9like_[Geopsychrobacter_electrodiphilus]    | ----- | ----- | ----- | ----- | ----- |
| znt9like_[Sneathiella_limimaris]               | ----- | ----- | ----- | ----- | ----- |
| znt9like_[Sneathiella_sp]                      | ----- | ----- | ----- | ----- | ----- |
| znt9like_[Sneathiella_chungangensis]           | ----- | ----- | ----- | ----- | ----- |
| znt9like_[Leptolyngbya_foveolarum]             | ----- | ----- | ----- | ----- | ----- |
| znt9like_[Massilia_sp._LC238]                  | ----- | ----- | ----- | ----- | ----- |
| znt9like1_[Variovorax_paradoxus]               | ----- | ----- | ----- | ----- | ----- |
| znt9like2_[Variovorax_paradoxus]               | ----- | ----- | ----- | ----- | ----- |
| znt9like_[Nitrosospira_sp._Nsp11]              | ----- | ----- | ----- | ----- | ----- |
| znt9like_[Sorangium_cellulosum]                | ----- | ----- | ----- | ----- | ----- |
| znt9like1_[Actinobacteria_bacterium]           | ----- | ----- | ----- | ----- | ----- |
| znt9like_[Phormidesmis_priestleyi]             | ----- | ----- | ----- | ----- | ----- |
| znt9like1_[Nosdoc_punctiforme]                 | ----- | ----- | ----- | ----- | ----- |
| znt9like2_[Nosdoc_punctiforme]                 | ----- | ----- | ----- | ----- | ----- |
| znt9like_[Nostoc_calcicola]                    | ----- | ----- | ----- | ----- | ----- |
| znt9like_[Nostoc_commune]                      | ----- | ----- | ----- | ----- | ----- |
| znt9like_[Nostoc_piscinale]                    | ----- | ----- | ----- | ----- | ----- |

|                                                                         |         |         |       |       |
|-------------------------------------------------------------------------|---------|---------|-------|-------|
| znt9like_[Nostoc_cycadae]                                               | -----   | -----   | ----- | ----- |
| znt9like_[Myxosarcina_sp._GI1]                                          | -----   | -----   | ----- | ----- |
| znt9like_[Chondrocystis_sp._NIES-4102]                                  | -----   | -----   | ----- | ----- |
| znt9like_[Pleurocapsa_sp._PCC_7319]                                     | -----   | -----   | ----- | ----- |
| znt33D_[Drosophila_melanogaster]                                        | -----   | -----   | ----- | ----- |
| transporter_[Pleurocapsa_sp._PCC_7319]                                  | -----   | -----   | ----- | ----- |
| transporter_[Leptolyngbya_foveolarum]                                   | -----   | -----   | ----- | ----- |
| transporter_[Myxosarcina_sp._GI1]                                       | -----   | -----   | ----- | ----- |
| transporter_[Chondrocystis_sp._NIES-4102]                               | -----   | -----   | ----- | ----- |
| transporter_[Phormidesmis_priestleyi]                                   | -----   | -----   | ----- | ----- |
| transporter_[Nostoc_piscinale]                                          | -----   | -----   | ----- | ----- |
| transporter_[Nostoc_punctiforme]                                        | -----   | -----   | ----- | ----- |
| transporter_[Nostoc_caldicola]                                          | -----   | -----   | ----- | ----- |
| cationtransporter3_[Firmicutes_bacterium]                               | -----   | -----   | ----- | ----- |
| c.e.p_[Firmicutes_bacterium]                                            | -----   | -----   | ----- | ----- |
| cationtransporter1_[Firmicutes_bacterium]                               | -----   | -----   | ----- | ----- |
| cationtransporter2_[Firmicutes_bacterium]                               | -----   | -----   | ----- | ----- |
| cationtransporter1_[Actinobacteria_bacterium]                           | -----   | -----   | ----- | ----- |
| cationtransporter2_[Actinobacteria_bacterium]                           | -----   | -----   | ----- | ----- |
| c.e.p_[Candidatus_Woeseearchaeota_archaeon_CG08_land_8_20_14_0_20_43_7] | -----   | -----   | ----- | ----- |
| transporter_[E.Coli]                                                    | -----   | -----   | ----- | ----- |
| znt9-like2_[Candidatus_Micrarchaeota_archaeon]                          | -----   | -----   | ----- | ----- |
| znt9-like_[Candidatus_Pacearchaeota_archaeon]                           | -----   | -----   | ----- | ----- |
| znt9-like_[Candidatus_Aenigmarchaeota_archaeon_ex4484_52]               | -----   | -----   | ----- | ----- |
| znt9-likel1_[Candidatus_Micrarchaeota_archaeon]                         | -----   | -----   | ----- | ----- |
| znt9-like4_[Candidatus_Micrarchaeota_archaeon]                          | -----   | -----   | ----- | ----- |
| znt9-like_[Candidatus_Woeseearchaeota_archaeon]                         | -----   | -----   | ----- | ----- |
| znt7_[Drosophila_melanogaster]                                          | -----   | -----   | ----- | ----- |
| znt7_[Danio_rerio]                                                      | -----   | -----   | ----- | ----- |
| znt7_human                                                              | -----   | -----   | ----- | ----- |
| znt7_[Mus_musculus]                                                     | -----   | -----   | ----- | ----- |
| znt7_[Rattus_norvegicus]                                                | -----   | -----   | ----- | ----- |
| znt5-like_[Ciona_intestinalis]                                          | -----   | -----   | ----- | ----- |
| znt5_[Danio_rerio]                                                      | -----   | -----   | ----- | ----- |
| znt5_human                                                              | -----   | -----   | ----- | ----- |
| znt5_[Mus_musculus]                                                     | -----   | -----   | ----- | ----- |
| znt5_[Rattus_norvegicus]                                                | -----   | -----   | ----- | ----- |
| znt6_[Ciona_intestinalis]                                               | TGILSSA | NLKLTKS | ----- | ----- |
| znt6_[Danio_rerio]                                                      | -----   | -----   | ----- | ----- |
| znt6_human                                                              | -----   | -----   | ----- | ----- |
| znt6_[Rattus_norvegicus]                                                | -----   | -----   | ----- | ----- |
| znt6_isoform1_[Mus_musculus]                                            | -----   | -----   | ----- | ----- |
| znt6_isoform2_[Mus_musculus]                                            | -----   | -----   | ----- | ----- |
| znt4_[Danio_rerio]                                                      | -----   | -----   | ----- | ----- |
| cationtransporter1_[Candidatus_Micrarchaeota_archaeon]                  | -----   | -----   | ----- | ----- |
| transporter_[Geopsychrobacter_electrodiphilus]                          | -----   | -----   | ----- | ----- |
| cationtransporter2_[Candidatus_Micrarchaeota_archaeon]                  | -----   | -----   | ----- | ----- |
| znt10_[Danio_rerio]                                                     | -----   | -----   | ----- | ----- |
| znt10_human                                                             | -----   | -----   | ----- | ----- |
| znt10_[Mus_musculus]                                                    | -----   | -----   | ----- | ----- |
| znt10_[Rattus_norvegicus]                                               | -----   | -----   | ----- | ----- |
| znt1-likel1_[Hydra_vulgaris]                                            | -----   | -----   | ----- | ----- |
| znt1_[Ciona_intestinalis]                                               | -----   | -----   | ----- | ----- |
| znt1a_[Danio_rerio]                                                     | -----   | -----   | ----- | ----- |
| znt1_human                                                              | -----   | -----   | ----- | ----- |





|                                                |   |
|------------------------------------------------|---|
| znt4_human                                     | - |
| znt4_[Rattus_norvegicus]                       | - |
| znt4_isoforma_[Mus_musculus]                   | - |
| znt4_isoformb_[Mus_musculus]                   | - |
| znt8_human                                     | - |
| znt8_[Mus_musculus]                            | - |
| znt8_[Rattus_norvegicus]                       | - |
| znt3_human                                     | - |
| znt3_[Rattus_norvegicus]                       | - |
| znt3_isoform1_[Mus_musculus]                   | - |
| znt3_isoform2_[Mus_musculus]                   | - |
| znt2-like_[Hydra_vulgaris]                     | - |
| znt35C_[Drosophila_melanogaster]               | - |
| znt2_[Ciona_intestinalis]                      | - |
| znt8_[Danio_rerio]                             | - |
| znt2_[Danio_rerio]                             | - |
| znt3_isoformX1_[Danio_rerio]                   | - |
| znt2_human                                     | - |
| znt2_isoform1_[Mus_musculus]                   | - |
| znt2_isoform2_[Mus_musculus]                   | - |
| znt2_isoform1_[Rattus_norvegicus]              | - |
| znt2_isoform2_[Rattus_norvegicus]              | - |
| znt9-like_[Hydra_vulgaris]                     | - |
| znt9_[Drosophila_melanogaster]                 | - |
| znt9-like_[Ciona_intestinalis]                 | - |
| znt9_[Danio_rerio]                             | - |
| znt9_human                                     | - |
| znt9_[Rattus_norvegicus]                       | - |
| isoform1_znt9_[Mus_musculus]                   | - |
| isoform2_znt9_[Mus_musculus]                   | - |
| znt9like_[E.Coli_partial]                      | - |
| znt9like_[Rhodanobacter_glycinis]              | - |
| znt9like_[Dyella_ginsengisoli]                 | - |
| znt9like2_[Actinobacteria_bacterium]           | - |
| znt9like_[Firmicutes_bacterium]                | - |
| znt9-like3_[Candidatus_Micrarchaeota_archaeon] | - |
| znt9like_[Mesorhizobium_sp._L2C054A000]        | - |
| znt9like_[Geopsychrobacter_electrodiphilus]    | - |
| znt9like_[Sneathiella_limimaris]               | - |
| znt9like_[Sneathiella_sp]                      | - |
| znt9like_[Sneathiella_chungangensis]           | - |
| znt9like_[Leptolyngbya_foveolarum]             | - |
| znt9like_[Massilia_sp._LC238]                  | - |
| znt9like1_[Variovorax_paradoxus]               | - |
| znt9like2_[Variovorax_paradoxus]               | - |
| znt9like_[Nitrosospira_sp._Nsp11]              | - |
| znt9like_[Sorangium_cellulosum]                | - |
| znt9like1_[Actinobacteria_bacterium]           | - |
| znt9like_[Phormidesmis_priestleyi]             | - |
| znt9like1_[Nosdoc_punctiforme]                 | - |
| znt9like2_[Nosdoc_punctiforme]                 | - |
| znt9like_[Nostoc_calcicola]                    | - |
| znt9like_[Nostoc_commune]                      | - |
| znt9like_[Nostoc_piscinale]                    | - |

znt9like\_[Nostoc\_cycadae] -  
znt9like\_[Myxosarcina\_sp.\_GI1] -  
znt9like\_[Chondrocystis\_sp.\_NIES-4102] -  
znt9like\_[Pleurocapsa\_sp.\_PCC\_7319] -  
znt33D\_[Drosophila\_melanogaster] -  
transporter\_[Pleurocapsa\_sp.\_PCC\_7319] -  
transporter\_[Leptolyngbya\_foveolarum] -  
transporter\_[Myxosarcina\_sp.\_GI1] -  
transporter\_[Chondrocystis\_sp.\_NIES-4102] -  
transporter\_[Phormidesmis\_priestleyi] -  
transporter\_[Nostoc\_piscinale] -  
transporter\_[Nostoc\_punctiforme] -  
transporter\_[Nostoc\_caldicola] -  
cationtransporter3\_[Firmicutes\_bacterium] -  
c.e.p\_[Firmicutes\_bacterium] -  
cationtransporter1\_[Firmicutes\_bacterium] -  
cationtransporter2\_[Firmicutes\_bacterium] -  
cationtransporter1\_[Actinobacteria\_bacterium] -  
cationtransporter2\_[Actinobacteria\_bacterium] -  
c.e.p\_[Candidatus\_Woeseearchaeota\_archaeon\_CG08\_land\_8\_20\_14\_0\_20\_43\_7] -  
transporter\_[E.Coli] -  
znt9-like2\_[Candidatus\_Micrarchaeota\_archaeon] -  
znt9-like\_[Candidatus\_Pacearchaeota\_archaeon] -  
znt9-like\_[Candidatus\_Aenigmarchaeota\_archaeon\_ex4484\_52] -  
znt9-likel1\_[Candidatus\_Micrarchaeota\_archaeon] -  
znt9-like4\_[Candidatus\_Micrarchaeota\_archaeon] -  
znt9-like\_[Candidatus\_Woeseearchaeota\_archaeon] -  
znt7\_[Drosophila\_melanogaster] -  
znt7\_[Danio\_rerio] -  
znt7\_human -  
znt7\_[Mus\_musculus] -  
znt7\_[Rattus\_norvegicus] -  
znt5-like\_[Ciona\_intestinalis] -  
znt5\_[Danio\_rerio] -  
znt5\_human -  
znt5\_[Mus\_musculus] -  
znt5\_[Rattus\_norvegicus] -  
znt6\_[Ciona\_intestinalis] -  
znt6\_[Danio\_rerio] -  
znt6\_human -  
znt6\_[Rattus\_norvegicus] -  
znt6\_isoform1\_[Mus\_musculus] -  
znt6\_isoform2\_[Mus\_musculus] -  
znt4\_[Danio\_rerio] -  
cationtransporter1\_[Candidatus\_Micrarchaeota\_archaeon] -  
transporter\_[Geopsychrobacter\_electrodiphilus] -  
cationtransporter2\_[Candidatus\_Micrarchaeota\_archaeon] -  
znt10\_[Danio\_rerio] -  
znt10\_human -  
znt10\_[Mus\_musculus] -  
znt10\_[Rattus\_norvegicus] -  
znt1-likel1\_[Hydra\_vulgaris] -  
znt1\_[Ciona\_intestinalis] -  
znt1a\_[Danio\_rerio] -  
znt1\_human -

znt1\_[Mus\_musculus]  
znt1\_[Rattus\_norvegicus]  
znt1\_isoformG\_[Drosophila\_melanogaster]  
znt1\_isoformF\_[Drosophila\_melanogaster]  
znt1-like2\_[Hydra\_vulgaris]

-  
-  
-  
**L**  
-
