# Supplementary material
Source: PubMed Central journal article supplement (PMC10491466)

Tree scale: 1

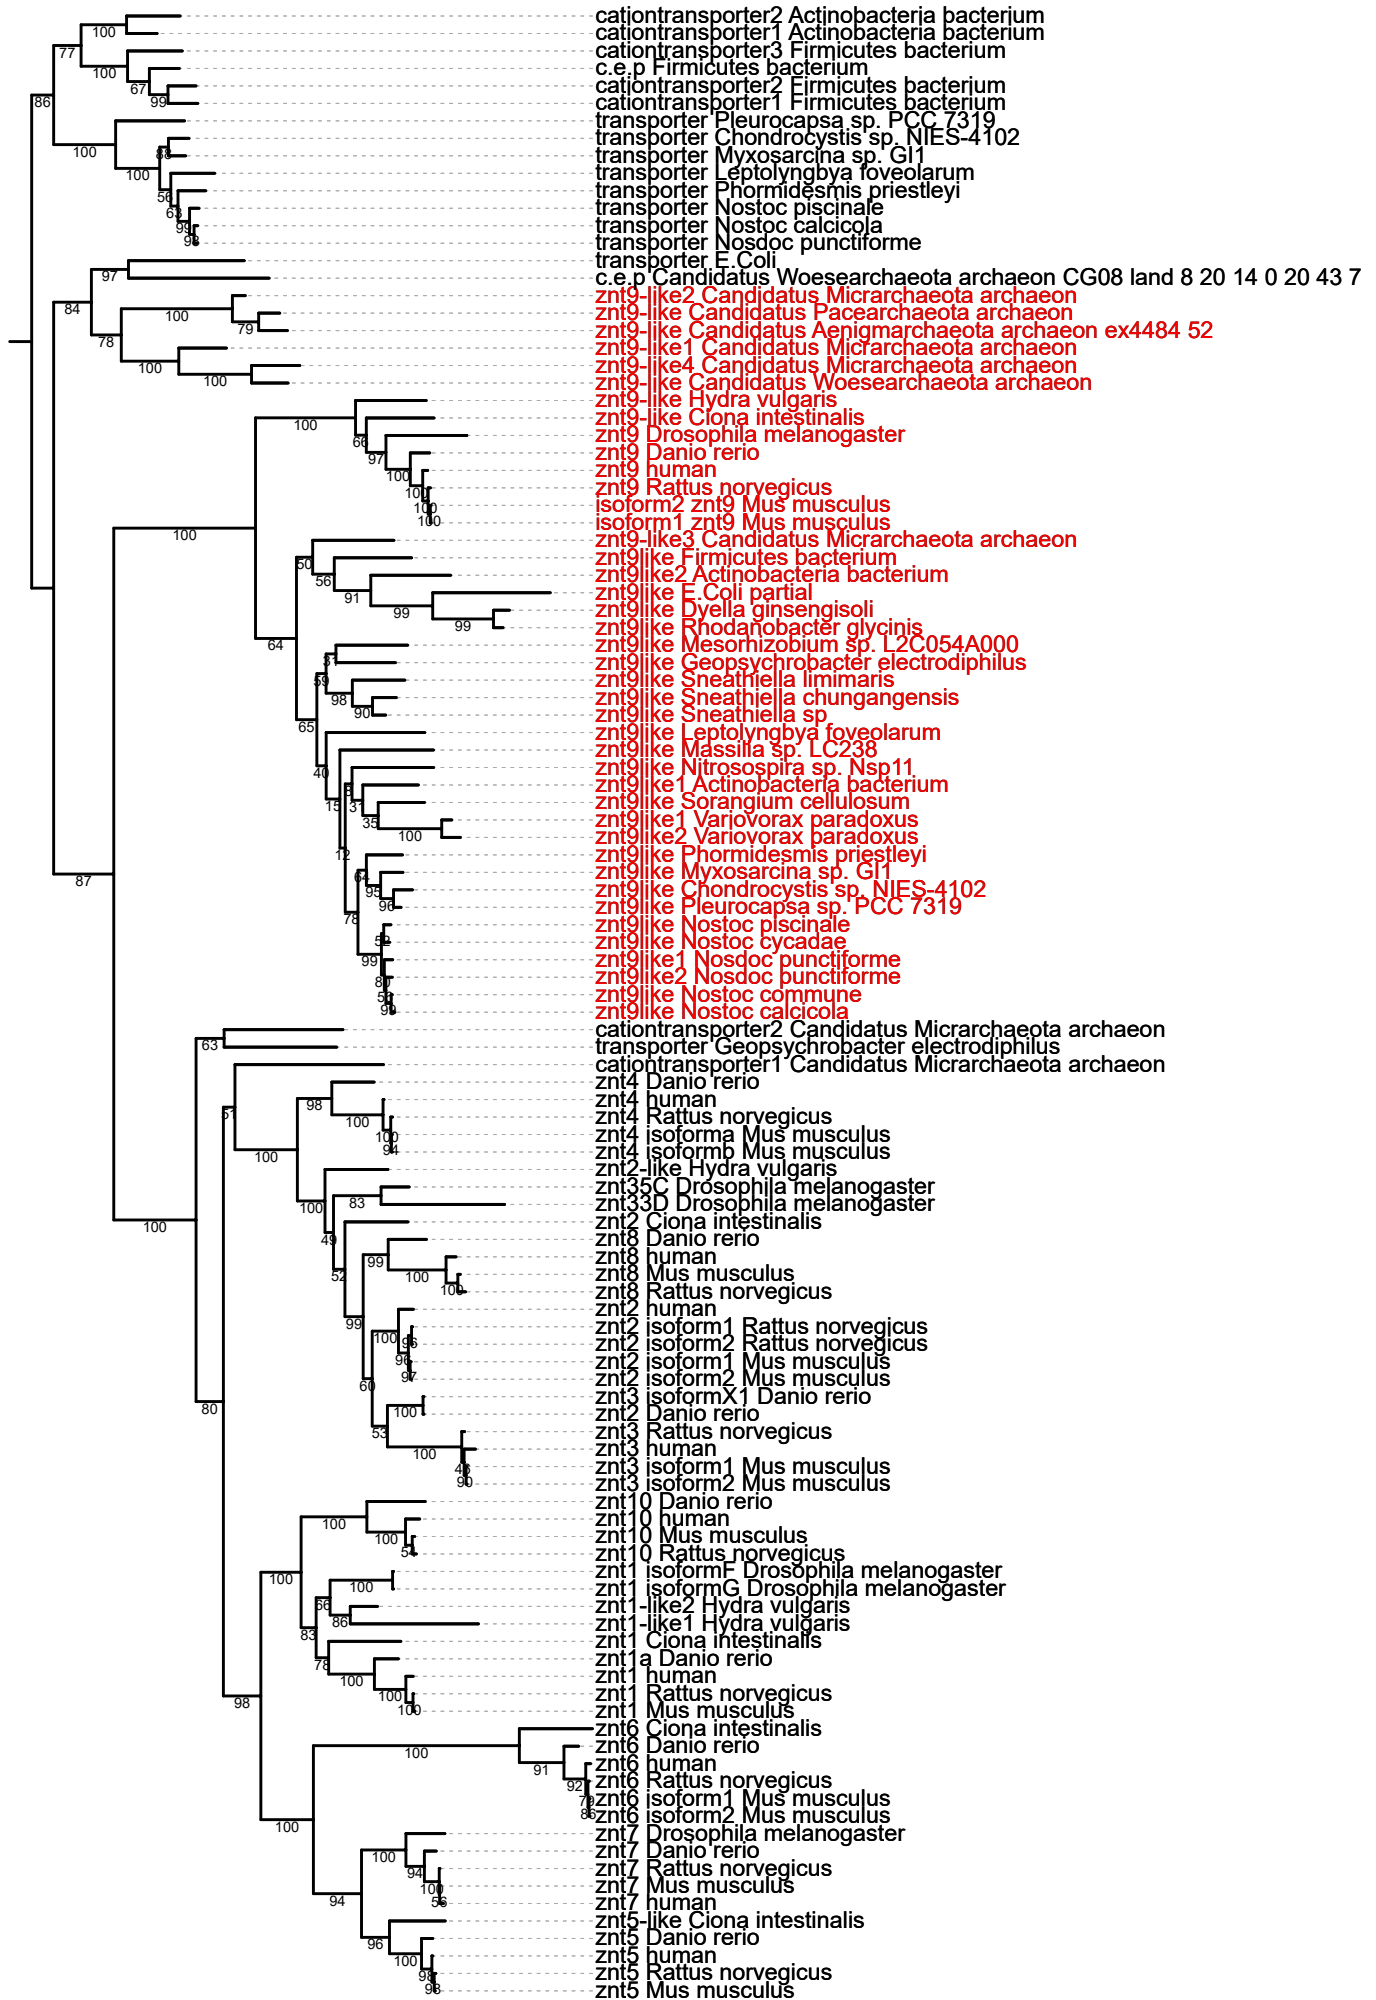

Supplement: NIHMS1751066-supplement-S2.pdf [file NIHMS1751066-supplement-S2.pdf]

Tree scale: 1

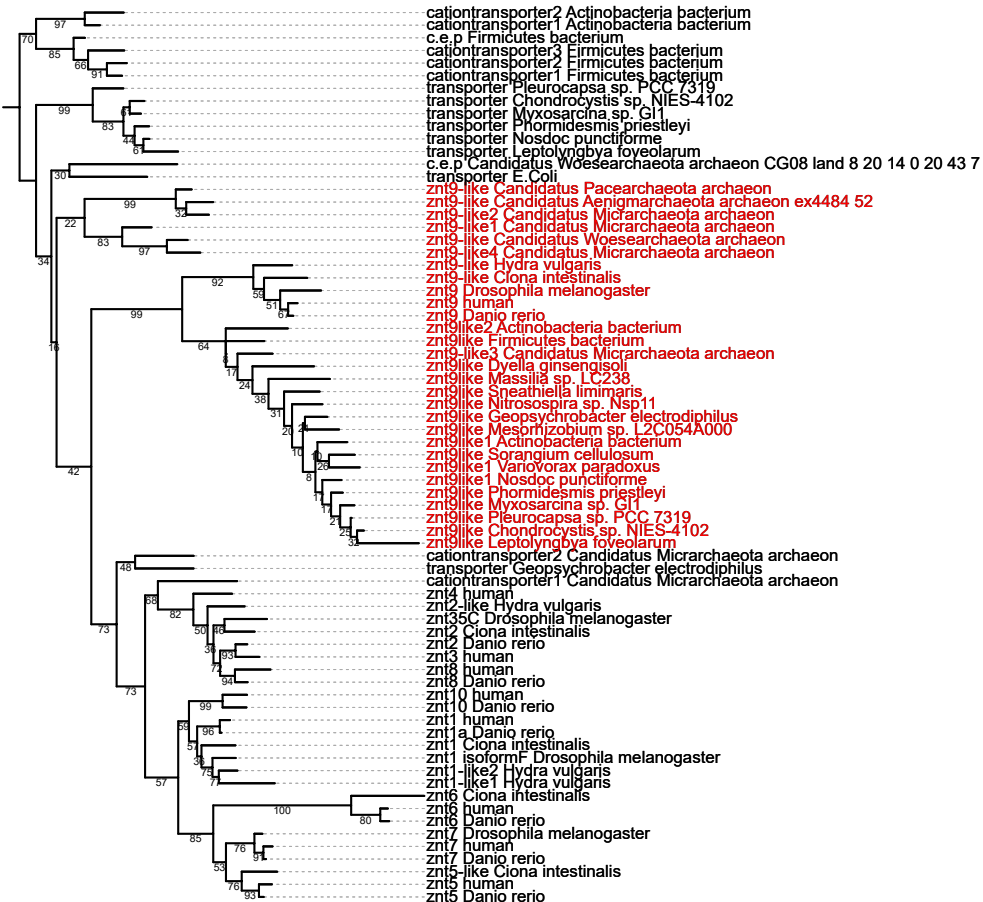

Supplement: NIHMS1751066-supplement-S3.pdf [file NIHMS1751066-supplement-S3.pdf]

**SLC30A9 versus ATP5J**

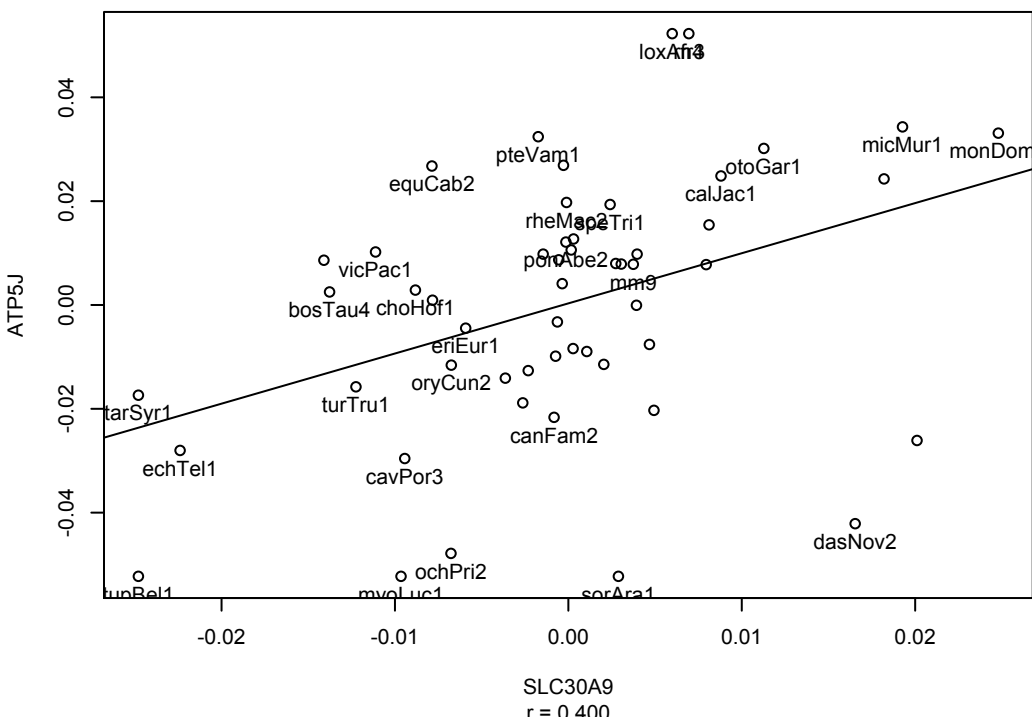

**SLC30A9 versus ATP5F1**

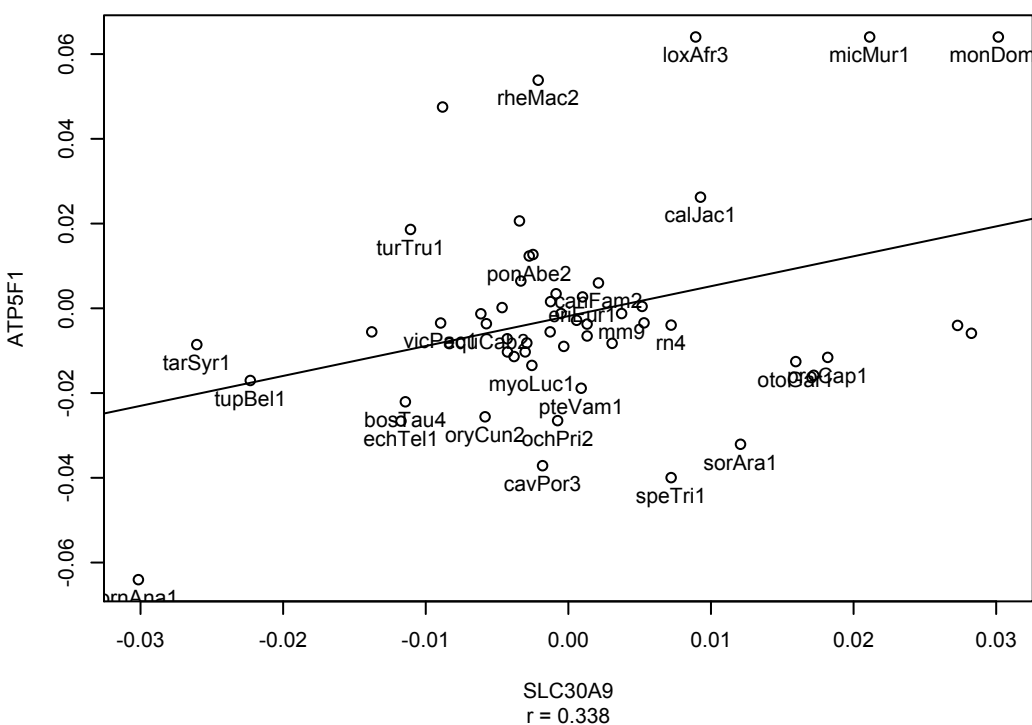

**SLC30A9 versus ATP5H**

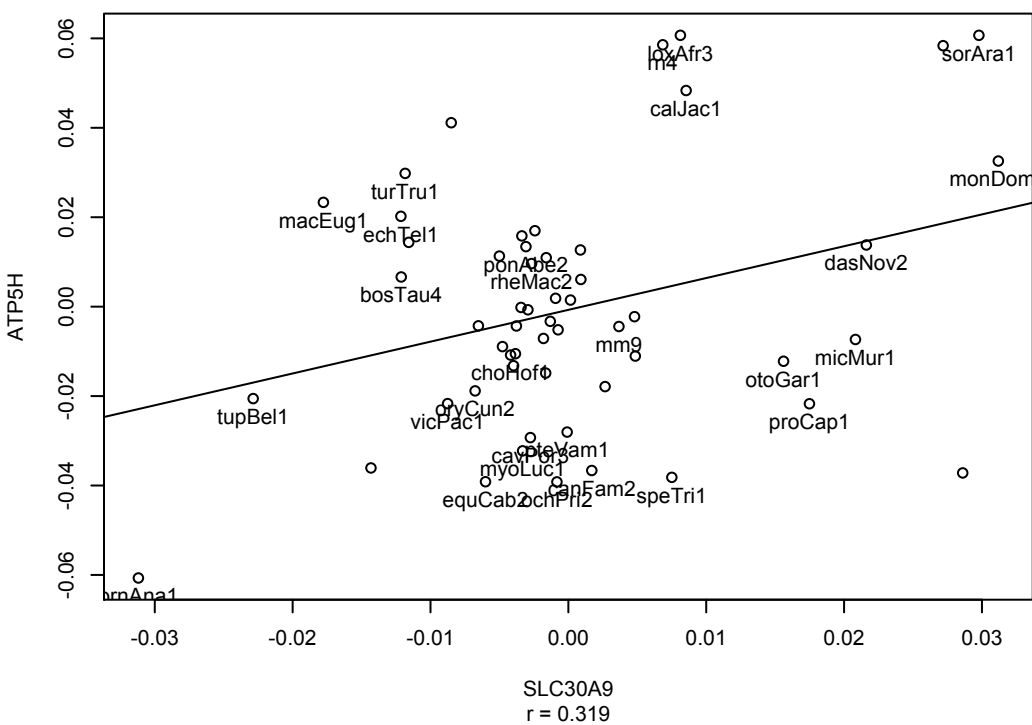

Supplement: NIHMS1751066-supplement-S4.pdf [file NIHMS1751066-supplement-S4.pdf]
